# Supplementary material
Source: publisher figshare collection journal article supplement (https://gsajournals.figshare.com/articles/dataset/_/13644098)
Supplement: Supplementary file 1 [file 1]

## Sheet: Table S1
Table S1. Untransformed best linear unbiased predictors of 11 elemental grain phenotypes used for the genome-wide association study and whole-genome prediction in the Ames panel
Accession number	Inbred line	Accession included in GWAS	B	Ca	Cu	Fe	K	Mg	Mn	Mo	Ni	P	Zn
Ames10244	Ab26	Yes	2.22459	47.2855	2.63723	34.8093	4858.7	1660.51	7.80492	0.413732	0.274351	3853.59	50.1098
Ames10247	GA152	Yes	2.45971	22.4996	2.1113	24.0466	4597.54	1481.02	5.33596	0.573699	0.367791	3551.78	30.8089
Ames10249	GA212	Yes	1.9947	31.0318	3.35957	24.775	3917.96	1273.02	3.59974	0.487847	0.183565	3198	31.6786
Ames10250	GA215	Yes	2.76414	47.3431	1.95662	23.7701	4327.59	1234.2	5.22525	0.488946	0.183266	3044.82	34.1722
Ames10251	GA219	Yes	2.2215	34.7493	2.38328	22.7178	4518.48	1388.85	8.7037	0.533116	0.338336	3557.59	39.6175
Ames10252	GA222	Yes	2.34893	36.2532	2.61531	20.9944	5003.65	1296.4	5.73968	0.472935	0.136362	3427.12	29.7156
Ames10253	GE19	Yes	2.18642	38.1636	1.65601	27.0014	4368.36	1462.2	4.87373	0.595771	0.374597	3631.94	32.8012
Ames10254	GE54	Yes	2.25979	52.2152	2.19685	22.1561	4134.79	1306.86	5.43319	0.527593	0.0371912	3405.73	23.7604
Ames10255	GE72	Yes	1.98654	35.6335	2.92688	23.6932	4910.48	1342.16	6.07039	0.430228	0.238723	3645.2	34.1804
Ames10256	GE129	Yes	2.3823	76.2931	2.12089	20.5685	3713.21	1257.63	3.59097	0.357594	0.30169	3142.04	24.1215
Ames10258	GE293	Yes	2.26729	37.731	3.1092	19.9462	3785.87	1353.82	5.78493	0.498701	0.303575	3208.29	33.1259
Ames10259	GE311	Yes	1.82777	40.4022	2.48907	25.0848	4551.85	1397.12	3.1049	0.419579	0.164945	3029.83	28.2267
Ames10260	GE317	Yes	2.20942	34.23	2.5328	19.7796	3956.42	1380.84	5.48734	0.654276	0.142315	2988.58	27.1278
Ames10261	GE335	Yes	1.88367	26.6785	2.88732	29.6967	4836.62	1492.92	6.43911	0.485524	0.326076	3805.86	30.6878
Ames10264	L605	Yes	1.91756	35.145	1.68203	22.5485	4064.59	1533.71	7.31268	0.446326	0.162937	3334.51	31.72
Ames10265	L678	Yes	2.06025	36.4844	2.55957	24.2318	4006.45	1374.12	5.77644	0.416131	0.236283	3202.01	33.5595
Ames10267	SC15	Yes	1.70745	26.6853	1.88485	21.0136	4231.56	1182.71	5.90853	0.57299	0.173611	3212.25	30.0631
Ames10269	SC44	Yes	2.12508	46.7161	2.17003	33.888	4607.68	1545.32	7.70839	0.472113	0.167629	3676.34	29.2359
Ames10271	SC84E	Yes	1.72843	40.3758	2.98857	23.868	4164.99	1315.58	5.2854	0.422836	0.354905	3389.3	32.9973
Ames10272	SC90	Yes	2.24149	66.6644	3.06495	23.513	4724.04	1308.96	6.23946	0.459373	0.323288	3485.68	36.5542
Ames10273	SC102	Yes	2.10431	24.1704	2.05061	20.7413	3992.22	1267.34	5.78203	0.462196	0.0967282	3475.35	23.4061
Ames10274	SC144	Yes	2.39247	62.8104	1.84552	26.8976	4123.73	1376.11	7.36871	0.434843	0.333484	3297.15	34.2706
Ames10276	SC225	Yes	2.7621	32.2987	2.53597	20.1766	4038.11	1311.5	4.70264	0.427179	0.490755	3146.7	38.9529
Ames10277	SC235	Yes	2.01001	48.8599	1.7679	23.5459	4101.08	1266.13	4.31008	0.45859	0.129825	3139.46	32.1235
Ames10287	ABPl3	Yes	2.03532	54.4194	2.47988	24.9408	4433.63	1248.44	5.99673	0.374148	0.253282	3456.61	34.2436
Ames12725	NC7	Yes	2.04582	34.0686	3.06345	22.8156	3851.97	1237.54	7.07104	0.518527	0.138848	3206.75	29.5579
Ames12726	NC13	Yes	2.09426	35.9914	1.85974	22.5035	3682.12	1313.72	4.45324	0.395988	0.284961	3058.54	25.3664
Ames12727	NC83	Yes	2.12568	40.6731	1.57757	17.8589	3813.26	1347.31	4.12329	0.525925	0.413369	3155.93	32.1557
Ames12728	NC220	Yes	1.88356	25.2707	1.87564	18.5603	4069.64	955.203	2.37815	0.555654	0.264292	2651.48	23.1551
Ames12729	NC222	Yes	2.14205	45.9451	3.23738	29.9814	4133.29	1217.14	5.48228	0.564836	0.454991	3288.32	35.8976
Ames12730	NC224	Yes	2.09053	13.569	2.49769	19.6864	4879.89	1305.56	5.02607	0.576385	0.206617	3634.05	31.9417
Ames12731	NC230	Yes	2.17007	38.5293	1.93962	25.9777	4250.69	1389.43	6.01043	0.48652	0.385387	3478.7	28.4842
Ames12732	NC232	Yes	2.16161	33.2469	1.76972	17.8516	4066.88	1255.08	4.06105	0.519669	0.425408	3146.48	25.624
Ames12733	NC234	Yes	1.88459	28.7816	2.48993	18.65	4572.6	1320.32	4.66794	0.480547	0.343297	3325.68	28.708
Ames12734	NC236	Yes	2.15873	35.1033	2.23145	22.7545	4261.97	1311.65	4.51162	0.507247	0.130033	3376.53	33.6438
Ames12735	NC238	Yes	2.01714	10.8677	2.63734	23.6331	4423.11	1271.18	5.69324	0.567192	0.24043	3257.88	29.6459
Ames12736	NC240A	Yes	2.26414	20.2021	1.85225	19.8691	4508.41	1271.48	5.29295	0.401279	0.0833625	3273.46	24.3151
Ames12737	NC242	Yes	2.16938	35.6224	2.19498	27.6656	4032.67	1309.57	4.33093	0.614295	0.587129	3286.15	32.7503
Ames12738	NC244	Yes	2.11252	42.8429	1.63071	24.6813	3738.42	1345.03	6.07924	0.627526	0.273389	2981.23	34.3219
Ames12739	NC246	Yes	2.24888	40.7513	3.5282	23.6128	4396.82	1281.15	5.69001	0.523988	0.319652	3022.38	32.0663
Ames12740	NC248	Yes	2.1211	19.8714	2.64932	23.2638	4085.44	1178.6	4.57741	0.455284	0.409152	3114.84	33.0699
Ames12814	89S4083	Yes	2.05062	8.60111	1.86439	20.6489	3955.15	1243.05	5.0739	0.557729	0.133601	2854.75	23.9182
Ames12815	89S4098	Yes	2.17122	38.8281	2.24395	27.8767	4670.85	1207.54	5.50857	0.558909	0.13634	3011.83	33.6832
Ames12816	89S4107	Yes	2.11985	39.0405	2.72505	25.9796	4426.36	1447.25	4.99744	0.483295	0.33932	3601.04	28.0369
Ames12817	89S4110	Yes	1.99845	27.1836	1.68566	22.3691	3411.65	1212.69	3.08395	0.376279	-0.0176776	2667.36	22.053
Ames12818	89S4117	Yes	2.97627	15.7502	1.80265	19.2608	4610.53	1181.06	4.90704	0.44887	0.231791	3265.18	28.852
Ames12819	89S4125	Yes	2.40729	33.5838	1.30764	22.667	4416.63	1205.67	4.76705	0.387136	0.16984	3285.92	31.0623
Ames12820	89S4127	Yes	2.18704	54.5913	1.85323	19.9021	3647.45	1040.96	3.87752	0.375783	0.360844	2713.12	29.8995
Ames12821	89S4145	No	2.42572	44.3563	2.17423	24.4759	4384.43	1359.99	5.59091	0.366465	0.0796767	3460.86	30.2711
Ames12822	89S4154	Yes	2.1361	23.5062	1.70068	19.5943	4481.98	1431.77	5.83746	0.427874	0.375866	3449.43	29.2778
Ames12823	89S4157	Yes	1.91624	36.095	1.26638	17.1364	3651.24	1313.07	5.20218	0.45023	0.443565	3001.23	20.9516
Ames12824	89S4190	Yes	2.17225	37.4588	2.18092	21.5466	5064.98	1582.59	7.14745	0.391157	0.153192	4090.49	22.2084
Ames14111	T202	Yes	2.39152	34.247	2.39303	21.1474	4727.27	1485.83	6.10715	0.506608	0.317547	3425.03	29.6167
Ames14112	Va3A	Yes	2.24986	39.6584	3.54679	23.2533	4139.71	1217.69	5.595	0.407568	0.157911	3141.57	34.309
Ames14113	Va12C	Yes	2.30227	28.3022	1.87889	24.6783	4801	1333.24	5.07371	0.437976	0.354718	3383.88	33.0716
Ames14114	Va14A	Yes	2.14175	34.3232	3.66229	26.5003	4352.15	1295.27	5.81312	0.584439	0.319281	3413.97	32.5333
Ames14115	Va35C	Yes	2.1893	34.6607	2.15543	21.4604	3938.14	1340.38	5.16343	0.587929	0.157407	3228.3	29.7317
Ames14116	Va36A	Yes	2.00343	35.7871	2.44319	24.0904	3786.42	1263.5	5.15744	0.504426	0.262517	3398.57	29.8153
Ames14211	EAST028WHITECOB	Yes	2.64137	30.9638	2.52005	23.0515	4586.73	1097.88	4.37395	0.650215	0.143285	2978.7	27.759
Ames14407		No	2.59376	54.4937	1.53651	18.024	3863.71	1109.68	5.31068	0.424419	0.0491616	2680.67	24.2989
Ames15929		Yes	2.48225	59.0062	2.58422	23.129	5087.73	1418.95	7.73908	0.461	0.190755	3553.44	29.0281
Ames18999	Ab28A	Yes	2.06924	36.2141	3.55288	24.775	4196.32	1331.34	7.20695	0.470511	0.251004	3312.68	35.1189
Ames19000	VaW6	Yes	2.13302	34.9278	2.79584	22.5417	4123.13	1299.95	6.43461	0.472763	0.203584	3137.54	33.5197
Ames19001	Va16	Yes	2.2648	26.5321	1.92211	21.1813	3903.48	1160.93	4.82064	0.488199	-0.000961303	2965.52	29.9138
Ames19002	Va17	Yes	2.74739	44.8212	2.37577	30.424	4833.47	1509.49	7.4896	0.520985	0.089707	3707.78	38.005
Ames19003	Va18A	Yes	2.15636	30.8438	1.82023	19.9094	3794.09	1239.67	5.94697	0.543265	0.289929	3127.56	33.383
Ames19004	Va21A	Yes	2.22004	40.971	2.29984	21.9767	4434.62	1306.36	4.84826	0.531806	0.0748052	3390.83	25.4192
Ames19006	Va22B	Yes	2.2682	37.232	3.46828	27.1034	5027.83	1539.26	6.78924	0.559636	0.193157	4096.55	35.6876
Ames19007	Va23	Yes	2.18948	46.0224	3.40469	20.2295	4134.84	1402.01	6.49833	0.611235	0.288176	3365.94	31.8484
Ames19008	Va24	Yes	1.94333	40.5771	3.18203	29.3815	4003.51	1246.38	4.40876	0.49326	0.24537	3194.66	28.382
Ames19010	Va37	Yes	1.96242	26.6889	2.52852	20.3682	4785.91	1535.67	6.96677	0.457475	0.107528	3830.06	34.1706
Ames19011	Va38	Yes	2.20428	37.0472	1.98395	24.8269	4258.89	1189.01	6.18949	0.481226	0.538928	3101.8	26.8497
Ames19012	Va39	Yes	2.70649	77.6614	3.69029	24.9625	5754.1	1545.8	5.5446	0.407455	0.344174	4270.36	33.803
Ames19013	Va46	Yes	2.32504	28.7399	3.14572	30.8164	4784.41	1459.13	6.35671	0.466865	0.24555	3821.31	34.5501
Ames19014	Va52	Yes	2.11648	37.4486	1.74691	26.6863	4316.62	1360.75	7.56239	0.586696	0.364123	3288.77	31.0192
Ames19015	Va58	Yes	2.25427	54.0136	2.8137	18.9768	4218.97	1260.17	5.00332	0.645906	0.320378	3274.86	28.4377
Ames19016	Va59	Yes	2.15951	39.634	2.98514	25.6308	4131.11	1342.18	5.46321	0.48631	0.251831	3102.64	31.4585
Ames19019	Va91	Yes	2.18347	53.4704	1.98795	27.5952	4545.27	1386.9	8.26168	0.45797	0.217311	3508.35	36.4844
Ames19097		No	1.93663	17.3004	2.20562	25.4616	4253.69	1270.32	4.89097	0.468666	0.236865	2985.89	28.626
Ames19283	B37TRf	Yes	2.44005	48.8392	2.47745	22.4303	4468.85	1403.58	6.42603	0.469423	0.324785	3313.91	28.2181
Ames19284	C103	Yes	2.13473	42.0491	2.92398	19.9879	4410.8	1034.31	4.63524	0.505153	0.183751	2998.6	24.3906
Ames19287	Mo17TRf	Yes	2.52961	18.0159	2.45034	21.1693	4603.79	1138.85	5.58801	0.550105	0.0499806	3075.06	28.9235
Ames19288	Oh43	Yes	2.187	36.5921	1.8528	23.8382	4332.63	1367.74	8.36229	0.509829	0.340003	3038.28	34.2338
Ames19290	Oh43TRf	Yes	2.17331	37.8698	1.98445	21.2151	4011.39	1387.41	8.4503	0.468873	0.438263	2979.23	32.0243
Ames19293	Wf9	Yes	2.34077	36.0085	2.29435	27.7473	4942.06	1341.85	6.28105	0.399261	0.538162	3618.93	37.2723
Ames19308	A634	Yes	2.18169	36.426	2.19057	23.6151	4497.74	1375.6	6.1004	0.505089	0.38325	3653.95	29.6043
Ames19309	A635	Yes	2.12082	24.3088	1.95344	19.2805	4490.37	1423.16	5.63375	0.417607	0.147732	3672.71	29.0408
Ames19310	A639	Yes	2.27297	27.3684	2.56006	17.6304	5164.95	1310.23	8.06074	0.41984	0.0371582	3454.38	22.4622
Ames19311	A641	No	2.4216	37.979	2.25134	24.099	4159.57	1307.65	6.18568	0.34571	0.270697	3345.13	26.7241
Ames19313	C123	Yes	2.12488	36.7656	1.91567	21.2113	4962.57	1103.12	4.69215	0.437326	0.377344	3313.04	28.2783
Ames19314	CI64	Yes	2.57922	30.7111	1.97491	18.3205	4438	1303.19	6.40713	0.650457	0.439007	3388.97	27.7648
Ames19316	CM174	Yes	2.21422	19.4425	1.86239	20.7607	4452.09	1429.03	5.61685	0.417883	0.271556	3719.28	25.7066
Ames19318	H107	Yes	1.95013	32.4165	2.42722	19.9099	4676.35	1266.07	4.99417	0.535583	0.0689022	3017.19	25.7238
Ames19319	H95	Yes	2.00994	50.197	1.74913	20.9762	4086.24	1237.01	5.90048	0.673678	0.0892388	2827.74	30.8265
Ames19321	N28	Yes	2.33284	23.6978	1.45145	20.6961	3743.5	1214.74	3.82353	0.425426	0.165302	2784.12	28.6929
Ames19323	Oh7B	Yes	1.91708	45.4143	1.734	20.5502	3669.59	1274.22	5.98899	0.4256	0.492497	3000.65	25.7889
Ames19324	Pa871	Yes	2.28086	27.1914	1.86887	21.5677	4568	1391.03	5.52553	0.62055	0.296371	3178.13	33.3106
Ames19326	R168	Yes	2.80266	40.7507	2.74584	28.3784	4660.36	1377.93	5.88517	0.600212	0.522709	3663.81	38.0273
Ames19327	Tx303	Yes	2.35256	29.8338	2.8449	16.7238	4736.63	1304.33	5.69413	0.48471	0.173353	3173.84	28.463
Ames19328	Va22	Yes	2.14645	36.3155	3.46932	26.2762	4193.19	1407.31	7.8033	0.532786	0.129325	3622.23	33.9993
Ames19330	W182B	Yes	2.47851	53.3437	3.15055	21.1618	4383.38	1312.21	7.14156	0.403004	0.342643	3320.94	35.9847
Ames20116	Mo23W	Yes	2.59031	29.7669	1.3332	31.2248	4706.93	1617.87	8.66975	0.527647	0.369194	3824.97	33.5729
Ames20118	Mo25W	Yes	2.12665	24.1016	2.46694	25.5449	4695.67	1314.2	5.13714	0.514286	0.206503	3334.88	39.2439
Ames20119	Mo40	Yes	2.18441	39.0133	2.1723	23.5574	4341.05	1259.32	5.47742	0.471059	0.325232	2975.21	29.967
Ames20120	Mo42	Yes	2.28656	36.687	3.33766	26.0114	4536.35	1338.39	6.57127	0.610793	0.116663	3405.13	33.9754
Ames20136	H21W	Yes	2.04207	33.7516	2.18528	27.4258	4243.44	1346.78	5.81801	0.405156	0.112241	3434.63	40.5141
Ames20137	H25W	Yes	2.05417	39.5301	1.51665	14.6179	4340.1	1331.91	6.07819	0.446367	0.527766	3186.35	26.6655
Ames20140	Mt42	Yes	2.58875	47.9515	1.53164	27.388	4155.76	1449.09	4.03841	0.494318	0.172389	3067.84	33.1047
Ames20190	CM37	No	2.26207	35.7221	3.00867	24.6163	4442.47	1475.55	5.65009	0.539342	0.0963239	3606.1	33.9973
Ames21095	R12	Yes	2.18753	52.832	2.49771	15.258	3775.62	1150.13	4.60435	0.433585	0.0303165	2876.73	32.5474
Ames21096	R35	Yes	2.08371	37.2133	2.24646	26.1757	3598.48	1249.97	6.70566	0.397329	0.291775	3022.51	31.3927
Ames21512	CI31A	Yes	2.04267	54.1499	3.11078	28.6208	4253.81	1350.59	4.75304	0.565017	0.216917	3375.91	33.0995
Ames22011	C5Ark1956	No	2.06357	41.1983	2.06734	28.1373	5671.91	1412.2	3.75094	0.432854	0.259019	3444.25	25.8417
Ames22012	C7	No	2.12213	65.0123	1.84444	26.7101	5179.35	1359.22	7.71815	0.505272	0.162067	3154.84	33.1976
Ames22014	C8pseudo	No	2.22497	66.9372	4.33015	34.7705	4966.64	1253.79	7.60418	0.418982	0.233661	3447.38	37.5207
Ames22015	C12-1	No	2.02438	38.0866	3.97528	33.6677	4481.54	1472.54	5.73158	0.450708	0.428355	3635.03	36.3889
Ames22016	C15	No	2.44201	55.1674	2.0358	27.9637	4606.25	1442.77	6.86312	0.50866	0.136893	3401.6	43.7207
Ames22017	C18	No	2.20725	66.5727	3.54844	23.7963	5023.48	1545.46	8.01698	0.519324	0.358989	3789.02	42.5265
Ames22018	C22	No	2.48463	44.7175	4.97057	21.2229	5173.94	1428.34	7.11072	0.564193	0.164826	3856.71	35.5166
Ames22020	C31	No	2.14025	30.5741	3.07023	29.6464	4321.41	1295.88	8.06069	0.483243	0.274112	3480.39	43.6647
Ames22021	C38	No	2.11777	33.1133	2.64417	25.2901	4235.19	1278.85	5.47094	0.465544	0.16653	3312.09	32.6523
Ames22022	C40	No	2.01998	42.5275	2.48304	31.1669	5518.27	1341.64	4.27273	0.659677	0.392993	3327	41.4972
Ames22023	C68	No	1.91028	38.9407	2.15039	26.4851	5345.41	1399.52	7.68339	0.574723	0.0647626	3743.83	29.2105
Ames22024	C90	No	2.53765	39.0039	3.83147	23.2293	4187.97	1135.69	5.41361	0.545075	0.259934	3063.97	44.4391
Ames22025	IaCG4189	No	2.10391	42.1586	2.54076	23.1538	4956.52	1544.56	7.67466	0.425473	0.192848	3697.16	33.5325
Ames22026	IaEv191	No	2.38079	65.4377	2.5071	35.0283	5981.58	1563.4	10.2618	0.45515	0.632002	4133.6	44.074
Ames22027	IaEv3004	No	2.52322	49.1207	2.57982	21.3106	5402.5	1375.56	5.60471	0.447033	0.160962	3358.81	31.6674
Ames22030	Ia453	No	2.18109	35.5383	2.56842	24.7911	4546.68	1312.14	5.93926	0.437287	0.143734	3297.72	32.9608
Ames22031	Ia5145	No	2.76623	99.0519	4.55832	28.4141	4905.32	1337.51	8.23689	0.581098	0.542077	3469.43	41.086
Ames22032	IP39	No	1.85721	34.6432	2.80366	26.3684	4500.08	1301.16	7.05746	0.494295	0.362623	3371.18	38.7103
Ames22033	Ill101Q	No	2.17261	42.2063	2.04559	20.5152	4084.03	1268.89	5.11341	0.5611	0.0857419	3229.44	26.496
Ames22034	M23	No	2.10091	24.9842	1.90551	27.8721	4810.83	1422.34	6.22456	0.489599	0.136619	3370.44	30.228
Ames22035	M45	No	2.12917	55.6891	3.53878	23.3165	5764.9	1448.27	7.7861	0.623998	0.136458	3570.8	38.7555
Ames22036	Ma32	No	2.13617	38.2148	2.70351	28.172	4414.11	1208.21	7.04094	0.519615	0.494618	3078.51	40.2951
Ames22038	Me100	No	2.09638	38.7003	3.35561	31.1723	4703.03	1500.44	5.02156	0.560129	0.193571	3589.23	34.4653
Ames22039	Me121Wa	No	1.86579	35.6535	2.63003	28.4279	4751.84	1399.74	6.50134	0.525901	0.27861	3499.91	36.0925
Ames22041	Me135	No	2.02628	41.7354	3.16072	22.7787	4189.61	1491.59	5.97765	0.525467	0.217149	3422.76	30.8798
Ames22042	Me244Wa	No	2.00641	61.6113	2.94058	26.0643	4421.16	1248.56	6.98338	0.493562	0.239792	3330.63	38.1193
Ames22044	NJ112	No	2.12844	37.0028	4.44059	27.8703	4591.12	1433.13	5.89626	0.554166	0.230641	3278.02	41.7544
Ames22045	NJ116Wa	No	2.2016	47.903	2.89318	23.6692	5435.02	1416.28	5.30414	0.43544	0.216378	3406.63	35.0939
Ames22046	NJ116Wb	No	2.16239	62.3769	4.76089	24.9619	4562.11	1303.79	5.79634	0.49298	0.284666	3168.87	36.74
Ames22047	NJ159	No	2.19702	61.9397	2.44534	26.8279	4595.5	1465.79	6.51872	0.596328	0.0729953	3540.98	33.2144
Ames22048	P39M96	No	1.58377	33.0042	2.36427	24.4755	4032.47	1077.41	5.34583	0.479628	0.0179398	2749.77	29.6096
Ames22049	P51	No	2.20235	46.8814	2.62792	26.1161	5542.6	1472.85	5.35062	0.65114	0.13191	3490.79	29.634
Ames22050	P51wx	No	1.99007	55.7936	2.9187	26.8668	4737.24	1262.64	5.66208	0.483696	0.241421	3328.04	34.2068
Ames22051	W1736	No	2.17106	36.244	2.78558	31.2856	5348.89	1332.69	7.07818	0.575703	0.144525	3473.4	31.5163
Ames22053	W3647	No	2.24638	39.0868	2.68862	23.5171	5137.63	1328.21	4.83609	0.547335	0.13282	3245.2	33.3851
Ames22055	W3742	No	2.1403	63.989	3.10304	33.5104	5296.97	1357.88	8.00828	0.572088	0.338836	3777.33	48.843
Ames22056	W5543	No	2.21405	46.1991	3.03311	21.5488	5382.16	1203.9	5.32636	0.412799	0.155711	3028.04	29.4295
Ames22057	W5552	No	2.1329	40.0798	2.39187	22.6598	6289.32	1466.13	6.88687	0.525659	0.245058	3798.23	31.7051
Ames22058	W5579	No	2.16484	43.9631	4.20561	26.287	4235.19	1324.6	5.53519	0.593286	0.23885	3413.28	44.6617
Ames22060	W6462	No	2.10502	44.9985	4.59654	28.1119	4940.83	1413.74	8.75488	0.429467	0.194741	3516.28	38.0192
Ames22061	W6714	No	2.35114	73.2286	2.60469	25.9681	5465.45	1292.47	7.03429	0.563768	0.113865	3455.81	30.1905
Ames22062	W6720-1	No	2.05393	52.2772	4.39199	24.2753	4607.2	1266.61	5.80226	0.428253	0.217231	3068.65	38.3724
Ames22063	W6720-2	No	2.12947	51.9568	3.00396	26.5681	4950.67	1298.33	5.26815	0.487036	0.112584	3428.68	33.1164
Ames22064	W6728	No	2.082	36.7903	2.46781	29.3906	5364.55	1313.19	6.62176	0.589464	0.151793	3385.16	26.2279
Ames22065	W6757	No	2.82147	58.4828	4.00762	22.7948	4327.82	1138.27	5.94769	0.582902	0.121715	3220.76	39.7368
Ames22067	W7151	No	2.11693	34.7829	2.64839	29.9698	5340.1	1437.64	7.59941	0.439032	0.190945	3694.92	47.6715
Ames22097		No	2.09188	34.7622	2.43813	26.5122	4224.09	1294.75	6.22902	0.508752	0.162782	3095.11	32.1504
Ames22439	A73	No	2.14177	49.1273	3.59239	23.6597	4748.54	1363.77	7.58375	0.477986	0.140326	3575.43	31.1152
Ames22440		No	2.6703	30.6846	2.21323	21.2386	4800.13	1454.7	5.17744	0.404768	0.580663	3320.84	31.0617
Ames22441	CH157	Yes	2.39879	44.5651	2.02503	18.8297	5270.78	1259.21	4.81234	0.405423	0.314007	3508.1	26.9113
Ames22442	Ms100	Yes	2.27653	36.0546	3.4635	26.1521	4160.84	1341.37	6.55628	0.574871	0.160067	3022.98	30.2103
Ames22443	A188	Yes	2.09039	37.0183	3.89923	19.6321	4540.57	1281.9	8.08333	0.392214	0.172464	3055.96	28.5005
Ames22748	H100	Yes	2.59359	25.4378	1.84652	21.3304	4468.74	1484.7	6.49046	0.466657	0.0673746	3619.84	27.7617
Ames22750	H112	Yes	2.11896	16.859	2.14388	21.0763	4083.53	1205.71	4.2018	0.496774	0.124589	3067.07	20.1096
Ames22751	H114	Yes	2.50379	46.8189	2.88895	22.3728	4313.04	1367.7	6.70307	0.475075	0.313715	3161.31	34.8787
Ames22752	H119	Yes	2.11923	31.0179	1.69823	22.0226	4261.78	1283.62	4.79631	0.503211	0.143562	2967.72	23.971
Ames22753	H123	Yes	2.0631	35.8381	1.86235	25.1138	4372.97	1241.8	3.9854	0.589977	0.278208	3308.46	29.4294
Ames22754	K55	Yes	2.02921	42.6236	2.2008	26.6205	3994.42	1335.1	5.78723	0.438877	0.375753	3273.99	30.1643
Ames22755	N197	Yes	2.10453	17.9184	2.71977	22.9445	4281.95	1179.63	5.06787	0.482628	0.0830963	3045.84	29.2841
Ames22756	Os426	Yes	1.68412	40.2089	1.8342	18.9199	3676.75	1216.1	6.23849	0.420634	0.0959009	2838.84	30.179
Ames22757	Pa405	Yes	2.20838	29.3872	1.04433	25.0687	3815.96	1533.2	5.65219	0.545504	0.399243	3256.19	29.6091
Ames22760	Tx71	Yes	2.12478	45.0879	2.35885	24.9801	4225.49	1325.85	4.93396	0.414194	0.084539	3171.96	32.1791
Ames22761	Tx81	Yes	1.66814	47.4473	2.35829	26.9247	4186.79	1411.51	5.32687	0.415601	0.168078	3428.18	32.7313
Ames22762	Tx118	Yes	2.23993	28.943	2.57802	25.6996	4184.38	1292.92	7.26499	0.535853	0.157457	3249.32	29.6862
Ames22792	ABPl2	Yes	2.12158	47.9816	2.14275	23.1861	4328.52	1297.71	5.71219	0.408574	0.229562	3396.98	31.1123
Ames22793	ABPl4	Yes	2.26163	40.034	2.24389	26.6511	4427.26	1298.71	5.12291	0.453633	0.20368	3067.68	33.3208
Ames22794	ABPl5	Yes	2.35597	55.4214	1.46891	18.9566	4630.71	1404.65	5.00698	0.852459	0.117125	3631.87	26.2993
Ames2327	Lai1029	Yes	2.30567	42.4061	3.69078	23.0529	5147.88	1534.18	7.01616	0.517008	0.191256	3749.49	34.9412
Ames2328	North7	Yes	2.52588	29.5137	1.8462	15.7985	4710.91	1187.98	4.37191	0.364848	0.108678	3188.09	22.6139
Ames2329	SW322	Yes	2.24407	27.7301	1.5055	25.2883	4366.1	1348.6	4.65912	0.482153	0.137756	3114.01	38.3726
Ames2330	East028	Yes	2.17984	35.6586	2.23251	22.9056	4028.77	1632.61	8.42046	0.481991	0.182422	3538.64	30.4361
Ames2331	Yellow3-4	Yes	2.0428	42.2	2.38761	20.6677	4031.86	1197.13	6.30935	0.473087	0.194008	2801.14	28.9638
Ames2332	Bei10=North10	Yes	1.95627	46.3591	1.37178	25.4217	4463.93	1238.3	4.27265	0.382452	0.054272	3239.31	24.4678
Ames2333	Yong28	Yes	2.24705	48.4665	2.60479	23.3071	4434.82	1496.39	7.22535	0.411364	0.0774274	3150.91	34.892
Ames2334	Yong28br2	Yes	2.48082	57.9701	2.75322	23.2135	4189.53	1443.98	7.09592	0.460322	0.0775497	2977.64	30.6583
Ames2335	Ye4	Yes	2.81998	82.4156	1.7596	25.7287	4943.88	1204.06	7.11615	0.648823	0.0817714	3441.73	38.5343
Ames2336	52220	Yes	2.4115	46.1271	2.72925	24.9949	5023.28	1318.99	5.08855	0.634163	0.113827	3376.92	35.3675
Ames2337	Huanyao	Yes	2.3281	73.6463	1.78896	23.0713	4192.4	1104.92	6.29907	0.555925	0.118245	3121.61	34.676
Ames2338	TwanxTzuh-S6	Yes	2.3368	26.1374	2.32185	33.3474	4861.97	1659.72	10.6153	0.532102	0.0953239	3847.68	41.4092
Ames23389	A15	Yes	2.94193	40.8232	3.3349	25.8502	5842.06	1425.8	8.34141	0.563084	0.174622	3612.23	33.3042
Ames2339	Huobai	Yes	2.41446	39.3356	2.3353	15.2123	3952.5	1202.92	5.30898	0.322478	0.183842	2931.34	22.235
Ames23391	A34	Yes	2.15158	25.6505	4.64652	23.3168	3893.75	1339.85	7.24669	0.452912	0.350265	3215.86	31.9985
Ames23392	A90	Yes	2.47597	28.21	1.64817	28.4975	4651.04	1200.04	6.11569	0.384964	0.116552	3107.01	42.3119
Ames23393	A96	Yes	1.97628	26.503	2.21506	27.7432	4201.13	1291.22	6.27291	0.457872	0.426984	3219.03	33.6242
Ames23394	A116	Yes	2.09393	48.2007	1.65088	17.556	3942.13	1294.62	5.60576	0.539037	0.140424	3078.51	24.8363
Ames23395	A152	Yes	2.33864	58.4875	2.63332	22.5829	4696.86	1479.82	8.68668	0.533502	0.0406703	3534.31	32.3141
Ames23396	A155	Yes	2.81633	53.9187	2.53632	21.0912	5046.98	1452.3	6.12594	0.586867	0.119328	3529.81	30.4721
Ames23397	A158	Yes	2.18731	44.8176	3.22243	18.8314	4771.45	1473.43	6.91023	0.427311	0.0142868	3525.09	27.2373
Ames23398	A166	Yes	2.24126	31.2664	2.48455	23.8826	4303.16	1294.27	7.91583	0.369636	0.0655347	3083.06	30.0995
Ames23399	A201	Yes	2.15314	37.1516	3.0721	25.6799	4967.92	1447.28	7.27882	0.533539	0.032757	3460.9	30.9518
Ames2340	WFg3-9	Yes	1.92719	29.8469	2.01944	27.4615	4442.54	1326.2	5.88309	0.599551	0.159405	3499.52	31.8745
Ames23400	A203	Yes	2.12738	37.6457	2.6607	25.8656	5384.35	1576.03	7.2569	0.525512	0.00691282	3621.46	30.8578
Ames23401	A204	Yes	2.45453	53.2697	2.45443	25.3389	4798.63	1569.26	8.61759	0.512107	0.110712	3632.81	33.0779
Ames23402	A208	Yes	2.26667	29.4465	2.6342	24.0758	5362.39	1381.46	6.36003	0.489935	0.0412103	3798.65	28.8526
Ames23403	A218	Yes	1.93213	40.1878	1.5969	22.7037	3595.03	1399.92	7.03517	0.405643	0.229854	3042.5	28.0322
Ames23404	A223	Yes	2.03489	48.0159	2.44846	20.9655	4240.19	1450.13	8.56221	0.544496	0.460764	3555.5	34.0805
Ames23405	A239	Yes	2.08768	63.0791	2.35496	24.186	4370.89	1350.14	6.78985	0.562426	0.134764	3398.77	36.85
Ames23406	A251	Yes	2.10403	41.7603	2.37358	19.9642	4456.27	1341.63	6.61068	0.423872	0.107618	3379.21	27.3332
Ames23407	A257	Yes	2.19832	46.3772	2.83186	22.5348	4638.39	1418.53	7.32342	0.562715	0.280253	3484.5	33.0266
Ames23408	A260	Yes	2.26111	28.2192	2.36099	22.9177	4371.93	1257.4	8.30673	0.501093	0.218307	3451.78	31.9857
Ames23409	A264	Yes	2.36616	28.8384	2.11505	20.0803	4980.07	1321.96	5.54805	0.465697	0.409368	3382.11	36.838
Ames2341	S330	Yes	2.36487	23.7199	1.88755	30.1117	5211.16	1591.81	6.70422	0.574505	0.164086	3495.5	38.7005
Ames23410	A265	Yes	2.03163	61.349	1.86706	23.4955	3567.11	1307.01	5.07594	0.415058	0.249624	2900.68	26.66
Ames23413	A286	Yes	1.97348	34.8617	1.28324	19.4783	4706.11	1326.96	3.57668	0.485347	0.854781	3071.71	25.3468
Ames23414	A288	Yes	2.00844	39.5696	2.02337	22.5077	4511.69	1511.85	7.42262	0.60285	0.162927	3571.07	32.2003
Ames23415	A295	Yes	2.10914	35.1497	2.87029	24.1352	4733.08	1343.46	4.84612	0.518635	0.193868	3396.98	33.5839
Ames23417	A305	Yes	2.42369	36.6373	1.7646	18.1399	4186.56	1290.8	6.03421	0.527357	0.173772	3126.24	28.2446
Ames23418	A308	Yes	2.19842	40.2679	3.95158	21.755	4433.16	1299.18	6.76368	0.47425	0.117285	3114.67	32.0268
Ames23419	A310	Yes	2.03916	30.7049	1.68181	22.086	4225.78	1321.1	7.29421	0.456042	0.178925	3139.27	35.5861
Ames23420	A312	Yes	2.11248	51.5345	1.4884	16.84	3882.36	1184.33	6.24453	0.436052	0.0748846	2943.71	25.6067
Ames23421	A321	Yes	2.03066	53.1842	2.06847	21.8794	4883.87	1407.22	10.5245	0.474581	0.286214	3587.77	35.2446
Ames23422	A322	Yes	2.52699	33.3538	2.18119	19.7451	3748.82	1117.14	7.22463	0.382997	0.0189879	2732.25	28.5847
Ames23423	A334	Yes	1.95073	48.6377	1.53519	24.1797	4698.71	1387.6	7.05066	0.622877	0.475935	3355.57	34.5868
Ames23424	A340	Yes	2.53477	45.8513	4.14653	22.2868	4505.3	1474.81	6.79641	0.57297	0.342762	3579.35	33.8613
Ames23425	A344	Yes	2.16415	62.1489	4.02425	27.291	4581.91	1570.69	9.62566	0.514997	0.152478	3283.23	37.0623
Ames23426	A357	Yes	2.05274	36.3481	2.43562	25.2826	4304.85	1484.38	8.32809	0.53641	0.152806	3561.35	42.0586
Ames23428	A375	Yes	1.83618	33.4792	2.74587	20.7989	4183.12	1404.04	7.2547	0.530243	0.255632	3646.54	31.8773
Ames23429	A385	Yes	2.58189	60.8442	2.37891	20.7187	6257.18	1387.18	4.69694	0.406816	0.0920984	3852.99	27.4144
Ames23430	A401	Yes	2.00995	42.6709	2.04989	32.9611	4278.49	1498.42	5.57754	0.524227	0.116724	3397.75	39.1927
Ames23431	A407	Yes	2.58538	61.1052	2.56975	24.135	4259.15	1416.92	5.74824	0.567519	0.058253	3347.7	31.4967
Ames23433	A422	Yes	2.1471	51.1378		17.6148	4645.14	1208.82	4.14887	0.447404	0.177178	3222.47	23.7394
Ames23434	A424	Yes	2.23944	56.8324	3.66089	30.4228	4302.81	1526.97	7.77305	0.498089	0.342041	3407.81	43.2521
Ames23435	A427	Yes	1.90655	33.3181	1.92532	25.9222	4040.02	1353.9	3.91893	0.675198	0.496028	3202.22	22.7673
Ames23436	A449	Yes	2.10236	42.8461	2.62258	22.2856	4955.52	1345.94	8.53656	0.386141	0.105341	3624.27	29.97
Ames23437	A450	Yes	2.07696	36.0426	2.33863	21.2739	4375.05	1348.47	9.0637	0.432831	0.261534	3454.32	34.0953
Ames23438	A451	Yes	2.32038	32.4308	3.34838	25.3843	5492.93	1381.04	8.0945	0.485215	0.141547	3483.25	45.486
Ames23439	A480	Yes	1.94261	34.6942	2.33946	22.5562	4034.53	1368.64	6.14452	0.429525	0.27678	3292.58	26.7825
Ames23440	A495	Yes	2.2462	66.0255	2.64353	20.1866	4731.02	1520.69	8.54762	0.519143	0.0627285	3704.43	30.9905
Ames23441	A497	Yes	2.34381	60.3091	3.50355	26.0052	5230.28	1497.64	7.68868	0.452155	0.14543	3684.78	33.122
Ames23442	A498	Yes	2.04367	50.9518	2.00384	19.7731	4347.07	1333.34	6.31434	0.408572	0.0638641	3331.99	25.8811
Ames23443	A499	Yes	1.99695	27.8028	2.3927	22.5468	4537.34	1565.7	6.49264	0.502326	0.0466688	3812.43	21.8603
Ames23444	A500	Yes	2.09078	44.2056	2.69503	20.5971	4918.69	1381.39	7.29064	0.517777	0.292211	3512.11	29.089
Ames23445	A502	Yes	2.00637	57.485	3.72445	22.79	4335.15	1322.89	6.7912	0.441506	0.608635	3301.64	35.7015
Ames23446	A508	Yes	2.05771	27.3554	2.87406	32.897	4842.13	1499.67	6.13684	0.469055	0.106559	3449.11	40.6097
Ames23448	A547	Yes	2.22003	34.1213	2.27258	20.6313	3724.59	1317.94	3.93913	0.52891	0.222237	3184.35	23.7731
Ames23449	A548	Yes	1.83855	33.7244	2.06673	19.5819	4368.5	1367.68	6.02489	0.575976	0.386053	3587.95	31.4154
Ames23450	A556	Yes	2.03057	38.7977	1.95928	28.2385	4116.2	1447.53	5.85683	0.527493	0.101206	2868.79	32.0802
Ames23451	A572	Yes	1.96229	50.614	2.31072	24.5331	4389.39	1564.88	9.44904	0.603337	0.188074	3432.71	36.6731
Ames23452	A575	Yes	2.21499	48.5481	1.976	22.395	4696.97	1361.25	6.05432	0.670482	0.0648231	3402.05	34.1656
Ames23455	A588	Yes	2.20989	22.6575	2.03213	21.545	4608.55	1402.01	5.81191	0.554075	0.205696	3572.81	31.5374
Ames23456	A617	Yes	2.17648	36.0908	3.22075	22.652	4333.49	1356.59	7.75082	0.438816	0.301852	3228.74	27.8188
Ames23457	A618	Yes	2.19909	29.1831	3.03547	21.1565	4395.94	1323.13	7.26301	0.586236	0.37424	3346.38	29.109
Ames23458	A619HT	Yes	2.08469	36.4432	1.89212	24.8449	4222.96	1303.45	5.44266	0.570373	0.429516	2783.06	34.3064
Ames23459	A622	Yes	2.06496	59.7373	2.69278	23.9802	4113.97	1211.9	6.92656	0.557323	0.14136	3167.74	31.1365
Ames23460	A624	Yes	2.0708	57.5685	2.91912	21.2215	4395.9	1393.86	4.95642	0.626658	0.133195	3318.82	34.7896
Ames23461	A625	Yes	2.44663	26.9625	2.66193	25.5431	4739.71	1475.39	7.97066	0.456985	0.448203	3605.2	35.9207
Ames23463	A627	Yes	2.24806	42.8632	1.77436	22.9503	4085.77	1417.22	8.06404	0.481598	0.172682	3397.81	29.8773
Ames23464	A628	Yes	1.84633	24.1512	2.57609	26.473	4112.92	1630.4	5.39404	0.453263	0.110722	3450.2	32.8506
Ames23465	A629	Yes	2.19532	23.7409	1.35238	26.7788	4387.95	1394.27	5.34226	0.42731	0.379473	3464.6	30.1986
Ames23466	A630	Yes	2.07583	33.5324	1.91325	24.0269	4759.16	1227.73	5.85783	0.461121	0.378618	3347.89	35.1376
Ames23467	A631	Yes	2.14164	40.5202	1.1769	23.9761	3782.15	1329.99	5.31532	0.373043	0.380788	3125.75	29.0348
Ames23468	A632HT	Yes	2.1618	28.3168	1.698	17.1742	4436.64	1279.95	5.81912	0.394072	0.168855	3424.92	24.3705
Ames23469	A632HTN	Yes	2.16728	26.0893	1.48666	18.7021	4522.98	1319.37	5.51794	0.416779	0.162244	3380.84	24.1939
Ames23470	A632RpRp	Yes	2.2848	33.8306	1.69645	18.0822	4557.23	1413.84	7.09239	0.376797	0.14251	3753.1	20.5449
Ames23471	A633	Yes	2.10265	14.5313	1.69375	21.0971	4812.51	1296.69	5.63986	0.415416	0.0897337	3656.46	21.6284
Ames23473	A635RpRp	Yes	2.15174	32.5108	2.32568	18.1454	4976.18	1432.61	6.27596	0.379318	0.30991	3525.67	28.0298
Ames23474	A636	Yes	2.23456	27.4867	2.10901	23.8463	4823.09	1514.61	7.85432	0.413063	0.359448	4024.45	23.9932
Ames23475	A637	Yes	2.12352	32.5592	1.93397	21.0776	3956.37	1301.31	5.66005	0.457341	0.0269779	3138.1	25.8993
Ames23476	A638	Yes	2.01937	45.5852	1.76457	29.6263	4190.79	1328.24	6.60625	0.439338	0.452303	3352.66	23.7831
Ames23478	A643	Yes	1.90734	55.6897	3.68151	20.7966	4034.51	1449.35	6.41633	0.463287	0.43948	3181.52	38.0173
Ames23479	A644	Yes	2.05178	39.9924	2.9442	28.9064	4495.78	1347.06	5.11332	0.59636	0.176513	3492.26	33.8807
Ames23480	A645	Yes	2.19428	50.7141	3.03126	21.0513	3533.8	1358.69	4.8455	0.595998	0.0662124	3282.26	32.7512
Ames23481	A646	Yes	2.18742	50.043	3.5578	21.711	3686.53	1572.46	7.02045	0.469659	0.0211802	3364.72	34.188
Ames23482	A649	Yes	2.34096	55.5386	2.64295	23.314	4055.05	1411.95	5.94845	0.549704	0.365475	3433.23	30.4496
Ames23483	A650	Yes	2.1614	36.5377	2.44572	24.899	4332.69	1384.64	6.60645	0.633391	0.206198	3429.23	32.3445
Ames23484	A651	Yes	2.38722	48.9254	3.03952	26.3709	4187.43	1341.55	6.86883	0.531551	0.114361	3115.22	31.715
Ames23485	A652	Yes	2.13879	34.0638	2.01063	22.6413	3948.6	1206.36	4.64086	0.469005	0.156039	2896.61	30.1976
Ames23486	A653	Yes	2.73055	26.2763	2.5634	26.5232	5505.06	1271.56	5.46423	0.390429	0.394486	3601.04	39.5594
Ames23487	A655	Yes	2.29253	29.3566	2.42676	29.5909	5517.6	1422.95	4.44971	0.428561	0.471475	3604.57	27.2153
Ames23488	A656	Yes	2.13013	37.9784	2.28433	17.4015	5415.75	1339.03	7.75296	0.444582	0.00776745	3552.79	22.1123
Ames23490	A666	Yes	2.15673	30.857	1.92468	20.9534	4203.99	1346.09	5.4261	0.594929	0.0732867	3066.88	30.9683
Ames23491	A667	Yes	2.2265	45.9025	2.94564	28.5123	5383.46	1525.23	7.64528	0.477819	0.141125	3985.44	36.4113
Ames23492	A668	Yes	2.32621	30.9973	2.80025	23.3137	4945.68	1402.01	6.38835	0.491902	0.0884257	3370.44	37.2643
Ames23493	A669	Yes	2.17901	121.079	3.54978	24.0313	4520.73	1315.95	5.43383	0.370169	0.18985	3113.72	32.1716
Ames23494	A670	Yes	2.27354	39.025	2.27314	27.8373	4821.5	1343.07	7.17071	0.560787	0.375951	3299.81	35.4099
Ames23495	A671	Yes	2.20305	46.7869	2.48505	26.2202	4873.4	1418.83	5.98692	0.571306	0.125355	3516.28	26.7673
Ames23496	A672	Yes	2.02804	39.5698	1.76974	16.6959	4659.97	1476.41	7.15787	0.393426	0.338048	3721.63	28.8782
Ames23497	A673	Yes	1.7218	36.2215	1.8544	23.7285	4407.99	1391.09	6.34949	0.465242	0.207444	3491.26	30.6309
Ames23498	A674	Yes	1.83348	37.2177	2.19262	21.1922	4219.18	1258.98	5.61141	0.55342	0.194831	3212.87	29.296
Ames23499	A675	Yes	2.28558	22.5527	2.41236	29.5973	4760.81	1338.97	3.80531	0.409029	0.194288	3317.77	28.4003
Ames23500	A676	Yes	2.12073	46.5666	2.29516	29.8707	3294.39	1369.75	6.99231	0.520798	0.173455	3168.21	27.5347
Ames23501	A677	Yes	2.30117	24.2347	1.6009	18.9641	4086.5	1218.02	3.54325	0.49147	0.145586	3052.48	27.9344
Ames23502	A678	Yes	2.34468	48.9801	2.18811	25.5544	4388.84	1270.46	5.9948	0.453247	0.346813	3126.24	37.6572
Ames23503	A680	Yes	1.95458	34.6065	1.73377	22.3386	4512.06	1195.7	3.89069	0.488178	0.130658	2970.1	27.2566
Ames23504	A681	Yes	2.20061	24.5107	1.80014	17.5671	4056.17	977.159	3.1296	0.431205	0.0700457	2453	21.7664
Ames23505	A683	Yes	2.44424	56.4926	1.65143	20.2633	3814.19	1166.34	5.82453	0.545312	0.143127	2941.23	28.4377
Ames23506		No	2.24895	36.5073	2.10289	27.7477	4928.25	1534.8	6.35673	0.407556	0.191474	3581.58	41.1345
Ames23507	C42	No	2.06346	46.7608	3.51198	28.2231	5285.62	1515.45	8.48422	0.567223	0.245999	3590.71	45.4685
Ames23508	S4	No	2.16749	48.9885	3.12691	24.4722	5751.69	1383.52	6.4484	0.435969	0.21342	3487.83	30.1139
Ames23509	S8	No	2.49815	66.6111	3.1606	24.704	4307.62	1389.13	6.43276	0.437011	0.299876	3201.35	26.6541
Ames23510	S43	No	2.21936	50.5885	4.04962	20.911	4758.29	1426.48	7.84636	0.464906	0.104348	3381.22	27.3145
Ames23710		No	2.06211	40.0704	2.08411	25.081	4702.75	1606.82	9.35537	0.494143	0.438136	3737.31	34.3145
Ames23922	Oh51A	Yes	2.30947	37.2902	2.2256	18.9495	4055.56	1305.92	5.17557	0.384861	0.194575	3368.11	28.5754
Ames23923	Tx61M	Yes	2.21397	53.8133	2.05478	20.7122	3906.37	1316.66	7.81796	0.396274	0.176985	3221.32	29.3291
Ames23924	Tx706	Yes	2.07124	54.8991	2.0602	23.5187	4652.24	1264.27	5.46717	0.606891	0.219032	3134.17	30.1733
Ames24575	IDS28	No	2.43101	40.6529	3.83746	29.0299	4375.3	1320.24	6.59412	0.526679	0.180836	3376.82	45.6785
Ames24576	IDS69	No	2.97485	61.8848	1.6259	22.1196	3536.1	1314.13	11.3858	0.461088	0.120116	2885.9	35.1736
Ames24577	IDS91	No	2.79787	55.4883	2.39003	24.7306	3966.94	1475.09	11.6188	0.546625	0.102214	3226.28	39.6001
Ames24585	CG10	Yes	2.0989	49.2031	2.69164	20.8342	4028.61	1436.44	6.12826	0.422118	0.655311	3418.23	33.7902
Ames24589	I159	Yes	2.03804	25.4581	1.46237	24.5012	4652.16	1338.21	5.79816	0.477509	0.722338	3281.47	31.8558
Ames24590	I198	Yes	2.04496	15.1744	1.56248	21.6959	4670.19	1265.66	5.30405	0.531458	0.350079	3277.42	29.6976
Ames24705	MS4	Yes	2.2025	51.5407	1.68446	22.0141	4171.29	1305.38	5.11544	0.387633	0.10555	3011.19	32.2349
Ames24706	MS12	Yes	2.23834	51.8535	1.72541	26.792	4637.2	1452.12	6.43878	0.475261	0.333922	3590.76	31.7558
Ames24707	MS24	Yes	2.13931	31.2327	1.39199	25.3423	4913.05	1383.23	6.36154	0.419485	0.468	3637.72	26.3996
Ames24708	MS24A	Yes	2.34997	31.6246	2.12648	29.0829	4829.45	1294.19	7.94963	0.365659	0.438094	3418.52	28.1135
Ames24709	MS57	Yes	2.05378	20.2713	2.86404	26.0666	4804.61	1342.33	5.73216	0.462509	0.248648	3544.21	30.1499
Ames24710	MS67	Yes	2.13889	34.076	2.16851	21.437	4535.18	1320.37	4.10236	0.547251	0.17448	3428.06	30.1065
Ames24711	MS68	Yes	1.9285	52.2326	2.55012	23.7995	4597.75	1413.07	7.53336	0.453585	0.359808	3552.24	32.9688
Ames24712		Yes	2.73533	65.3745	3.64526	20.6492	4904.69	1260.42	8.47717	0.470566	0.180715	3369.81	30.2459
Ames24713	MS72	Yes	2.0167	30.424	2.39788	24.569	4133.4	1311.86	4.69902	0.519631	0.272591	3356.39	32.3898
Ames24714	MS74	Yes	2.1926	29.2486	1.69589	14.9347	3749.38	1221.58	5.02179	0.66726	0.25979	2719.08	21.2943
Ames24715	MS75	Yes	2.36801	34.3385	1.73637	20.8671	4000.88	1274.38	8.6668	0.380819	0.226783	3115.85	25.1857
Ames24716	MS76	Yes	2.2789	30.1237	2.62664	19.66	4453.24	1228.73	5.32959	0.443306	0.340233	3287.19	29.6254
Ames24717	MS77	Yes	2.55375	24.331	3.06406	20.4232	5171.02	1436.1	6.06272	0.444174	0.468764	3667.05	29.4838
Ames24718	MS78	Yes	2.52363	30.5402	2.05681	31.8465	4666.12	1448.08	7.42478	0.589547	0.413782	3199.71	39.7692
Ames24719	MS79	Yes	2.38726	26.9126	3.27916	21.4176	4137.6	1306.25	7.79838	0.650359	0.284202	2918.09	33.4649
Ames24720	MS80	Yes	1.89321	55.2214	1.88694	17.9653	4419.45	1282.28	6.24927	0.417289	0.0759307	3309.95	27.3752
Ames24721	MS81	Yes	2.24779	33.1125	1.99786	20.0471	4601.08	1283.81	5.96704	0.471758	0.142726	2978.21	23.7228
Ames24722	MS89	Yes	2.45387	49.0437	3.58078	27.6317	5470.06	1293.07	6.73754	0.533142	0.219167	3578.26	27.8887
Ames24723	MS91	Yes	2.01635	34.8305	1.90424	23.3571	4400.05	1383.82	7.19232	0.544463	0.262186	3474.99	30.0716
Ames24724	MS92	Yes	2.17792	63.2365	2.95477	21.453	4506.01	1338.37	6.88765	0.48598	0.155214	3454.93	27.1618
Ames24725	MS93	Yes	2.47431	45.0115	3.0639	15.1024	4670.72	1197.03	6.80808	0.361211	0.171772	3376.45	27.6347
Ames24726		Yes	2.6584	48.9756	4.35048	26.3028	4145.47	1321.95	7.14277	0.561543	0.11053	3170.03	29.3678
Ames24727	MS106	Yes	2.33849	49.4703	1.95108	25.8508	4463.89	1474.11	7.98435	0.464761	0.418316	3388.61	43.3116
Ames24728	MS107	Yes	2.32134	33.9046	1.92977	25.3559	4582.13	1311.52	6.3734	0.479002	0.214701	3254.78	30.6924
Ames24729	MS116	Yes	2.33816	37.7487	3.06218	21.111	4090.26	1233.23	5.35516	0.4401	0.214093	2873.49	38.6002
Ames24730	MS132	Yes	1.96989	32.8063	2.66084	25.3246	5229.53	1440.49	6.91452	0.450558	0.0950633	3607.75	34.0124
Ames24732	MS141	Yes	2.04606	42.0212	1.757	17.0201	3607.79	1248.94	5.06267	0.421117	0.117562	3019.46	23.988
Ames24733	MS142	Yes	2.08542	47.9108	2.82921	21.1455	4362.35	1319.35	6.59432	0.517684	0.3931	3406.57	34.8172
Ames24734	MS153	Yes	2.25228	50.0553	2.6677	20.8609	4052.47	1213.75	6.29445	0.402665	0.0511051	3028.93	25.4587
Ames24735	MS198	Yes	2.05349	22.1624	2.78046	29.4174	5082.93	1465.43	6.76417	0.611845	0.406574	3605.27	38.573
Ames24736	MS199	Yes	2.20715	39.1999	2.10625	23.0071	4503.64	1282.12	7.36341	0.461586	0.147302	3365.14	26.33
Ames24737	MS200	Yes	2.4364	34.6798	1.55758	24.9331	5444.34	1381.54	6.98675	0.399224	0.619411	3839.4	33.2388
Ames24738	MS201	Yes	2.92178	43.7942	3.48743	24.1163	4859.07	1381.6	7.47805	0.708179	0.226643	3632.54	35.4226
Ames24739	MS203	Yes	2.11655	42.2207	3.28586	23.7408	4872.2	1479.86	7.52241	0.447327	0.121483	3661.13	37.1051
Ames24740	MS204	Yes	2.34235	40.7742	1.79932	26.421	4783.89	1470.51	5.97633	0.445649	0.110038	3366.77	33.1542
Ames24741	MS206	Yes	2.299	37.399	2.24843	18.6668	3467.86	1083.38	4.26341	0.372434	0.156074	2842.38	25.7332
Ames24742	MS211	Yes	2.22474	43.1612	1.98421	21.6976	4231.98	1317.65	6.50296	0.376075	0.286236	3360.86	34.4325
Ames24743	MS214	Yes	2.19122	39.1797	2.13708	21.167	4737.71	1324.91	7.02984	0.672536	0.062763	3573.11	26.4929
Ames24744	MS215	Yes	2.47882	56.3147	4.52849	21.798	4338.9	1393.49	8.16674	0.467646	0.257103	3343.55	29.9298
Ames24745	MS216	Yes	2.11989	39.8346	2.06891	22.2267	4641.23	1235.58	6.72454	0.54145	0.0654122	3423.38	25.0386
Ames24746	MS221	Yes	2.57173	28.3753	2.36514	17.8253	4761.63	1340.26	4.77532	0.392411	0.462457	3411.35	24.1795
Ames24747	MS222	Yes	2.48989	31.659	2.54774	21.0908	5344.2	1505.57	5.4172	0.374875	0.515638	3502.52	27.1261
Ames24748	MS223	Yes	2.21433	37.8832	2.10775	28.3639	4636.54	1465.07	7.24754	0.469208	0.17727	3512.64	37.0732
Ames24749	MS224	Yes	2.25548	38.8801	2.93662	26.7414	4612.4	1375.97	7.10282	0.492576	0.0454285	3582.45	34.2225
Ames24750	MS225	Yes	2.17905	46.453	2.21272	32.4476	5202.65	1814.08	10.5505	0.489785	0.134423	4341.12	36.9459
Ames24751	MS226	Yes	2.19032	57.7284	1.76398	16.6237	4554.64	1252.84	6.73622	0.351152	0.0823415	3267.07	22.5621
Ames24752	MS1334	Yes	2.06651	22.7325	2.83993	25.7369	4266.84	1354.86	6.73484	0.499115	0.0628396	3080.15	35.169
Ames24989	Va99	Yes	2.25738	56.8585	2.3792	19.6784	3851.48	1370.86	5.54455	0.511131	0.0913463	3062.67	27.01
Ames25179	SeparationfromSC84E	Yes	2.16269	41.7544	2.52726	24.3586	4757.66	1326.63	5.55874	0.491766	0.306627	3395.34	33.8033
Ames25218	GA221	Yes	1.96768	18.6135	1.73138	24.3566	4728.31	1369.84	6.19238	0.399174	0.413302	3435.92	33.2566
Ames25219	A619Ht1	Yes	2.19682	27.6423	1.72533	30.8836	4807.96	1426.54	6.69305	0.476523	0.42194	3083.41	41.0522
Ames25220	A619Ht2	Yes	2.43709	35.3682	2.40437	25.6691	4810.66	1483.25	6.51994	0.58126	0.321242	3316.75	39.125
Ames25221	A619Ht3	Yes	2.25764	37.606	2.15419	28.2396	4782.35	1489.26	6.69007	0.568374	0.458608	3110.05	37.9441
Ames2523	38-11RPARENTHB19INB	Yes	2.47709	42.6271	3.34363	24.0942	4500.9	1328.6	5.4242	0.50022	0.0802643	3360.73	37.8825
Ames25270		No	2.19412	31.7578	2.73467	24.3845	4841.06	1427.65	7.02776	0.412385	0.417059	3640.73	31.4602
Ames25372	Pa91HT1	Yes	1.84422	92.0197	2.79956	23.7067	4231.56	1459.07	10.2297	0.547058	0.217504	3245.85	42.9558
Ames25373	Pa91HT2	Yes	1.88119	62.619	2.65633	28.2885	4644.75	1667.64	9.30654	0.569807	0.147583	3753.8	43.6105
Ames25374	Pa91HT3	Yes	2.43598	99.3915	2.70341	27.3163	4173.06	1620.98	10.7832	0.52197	0.252565	3489.83	47.9476
Ames25559	H60	Yes	2.07361	32.6101	1.95506	24.0486	4215.49	1326.84	6.90822	0.433703	0.0941641	3432.19	24.2301
Ames26004	MINN5	No	2.0425	43.2554	2.32126	23.9823	3989.18	1299.24	6.77291	0.608166	0.256713	3182.35	33.3053
Ames26021	P8	Yes	2.18324	52.0457	2.32662	31.589	4246.95	1471.66	9.86906	0.475926	0.242085	3423.19	31.7671
Ames26022	Tr	Yes	1.73603	36.1286	1.75332	23.2943	4347.06	1509.46	7.13754	0.520692	0.345839	3743.79	28.8423
Ames26028	CI540	Yes	2.31835	42.84	1.90996	24.0847	4654.47	1326.28	5.49035	0.517833	0.26914	3215.24	32.5931
Ames26114	CI1	Yes	2.13642	36.9214	1.7532	22.7375	4120.22	1298.19	6.32998	0.453132	0.241806	3107.51	31.7019
Ames26115	CI2	Yes	2.20374	40.109	2.68029	24.2562	4430.54	1317.11	5.84125	0.475422	0.0965094	3143.07	34.1474
Ames26116	CI3A	Yes	2.21179	76.2562	2.67918	26.2341	5655.09	1311.23	5.7432	0.662747	0.213025	3648.41	33.0305
Ames26117	CI7A	Yes	2.11897	56.7761	3.12566	22.6573	4481.75	1495.19	9.98643	0.480751	0.311294	3438.26	33.9085
Ames26118	CI11B	Yes	2.2734	58.4037	1.68474	27.754	5539.08	1288.43	5.92409	0.470919	0.143247	3243.78	33.5887
Ames26119	CI19	Yes	2.39862	46.1525	2.69173	24.7023	4336.72	1239.46	5.28457	0.703058	0.123547	3245.08	35.7988
Ames26120	CI20	Yes	2.55346	39.2148	2.37891	20.8764	4426.25	1262.13	6.46957	0.579129	0.317089	3297.91	27.3123
Ames26121	CI28	Yes	1.75567	14.5535	2.0996	24.8997	3921.94	1410.02	6.39219	0.439969	0.0336857	3287.7	28.114
Ames26122	CI28B	Yes	2.07619	21.8885	2.25119	25.5843	3975.66	1460.77	7.32318	0.435256	0.0932455	3413.98	30.392
Ames26123	CI28C	Yes	1.89228	30.7207	2.48055	25.7971	3704.03	1301.47	7.74954	0.481941	0.0467049	3049.34	26.401
Ames26124	CI30	Yes	2.34529	31.9942	1.42005	21.8929	3961.19	1361.19	7.12309	0.484862	0.189336	3177.17	30.4545
Ames26125	CI31	Yes	2.03428	41.0437	2.35158	26.2631	4362.91	1345.61	4.82303	0.598571	0.105978	3374.45	30.5673
Ames26126	CI32	Yes	1.911	49.7299	2.89233	20.6438	3907.48	1421.49	4.34648	0.558356	0.111595	3166.51	28.2268
Ames26127	CI34	Yes	2.21788	33.6471	2.81801	23.0882	4058.38	1226.11	4.69923	0.471834	0.138679	3222	29.0285
Ames26128	CI40H	Yes	2.37739	57.5882	2.41117	26.4603	5070.36	1714.14	8.72445	0.640017	0.318183	3971.11	34.4697
Ames26129	CI41	Yes	2.29816	44.2454	3.78325	28.348	4546.77	1615.29	6.5385	0.472357	0.0896195	3742.64	37.1063
Ames26130	CI46	Yes	2.51497	47.7158	2.37891	19.9085	3120.25	1090.93	4.4721	0.53669	0.145081	2593.59	28.5759
Ames26131	CI70	Yes	2.25089	43.8521	1.94761	22.8111	3638.54	1247.5	5.33253	0.497381	0.142564	2906.07	31.7709
Ames26132	CI72	Yes	1.79076	30.0601	1.5821	22.872	4176.3	1299.99	5.88683	0.413025	0.330736	3334.54	32.5383
Ames26133	CI74	Yes	2.155	25.8809	2.42045	25.8982	4489.11	1417.47	6.41998	0.563929	0.193173	3371.82	29.6142
Ames26134	CI75	Yes	1.91371	40.0478	2.19564	20.9415	4107.32	1272.11	7.19308	0.543683	0.0733935	3146.85	29.7031
Ames26135	CI82B	Yes	2.0422	30.3822	2.93411	27.6426	4235.04	1393.38	4.85616	0.476168	0.133759	3287.45	35.9144
Ames26136	CI84B	Yes	2.04526	32.8639	2.29326	25.5163	4692.67	1275.4	6.03714	0.511596	0.125916	3091.53	40.1252
Ames26137	CI91C	Yes	2.00309	39.8644	2.77712	27.657	4122.88	1391.94	6.85757	0.506552	0.196901	3356.8	37.3068
Ames26138	CI187-2	Yes	2.07526	29.599	2.83286	25.9082	4298.93	1383.89	6.65336	0.438478	0.188303	3323.85	27.7188
Ames26439	GEMN-0034	Yes	2.12479	37.3365	1.76276	24.0366	4674.49	1454.1	5.51509	0.55869	0.188811	3375.2	38.5703
Ames26443	GEMN-0038	Yes	2.31234	37.4403	2.09329	22.2592	4647.18	1376.91	8.97697	0.662336	0.354308	3392.41	34.2299
Ames26484	GEMS-0008	Yes	2.18274	36.4914	1.88468	25.1773	4894.62	1329.41	5.46333	0.459192	0.183942	3551.01	32.6405
Ames26501	GEMS-0026	Yes	2.15433	53.0728	2.44177	19.6186	4165.85	1107.57	5.6634	0.450885	0.203112	2878.61	35.1968
Ames26511	GEMS-0007	Yes	2.09621	25.705	1.72955	27.3974	4221.83	1429.87	5.65565	0.580562	0.278555	3049.98	35.4756
Ames26525		No	2.1697	36.8833	2.36951	20.9571	3859.11	1178.56	5.26153	0.456869	0.348491	3025.52	26.8283
Ames26604	38-11	Yes	2.22835	35.4297	2.54421	24.0239	4194.29	1384.34	6.33483	0.608634	0.246699	3185.48	35.424
Ames26741	WX187-2	Yes	2.0949	24.8512	2.06152	23.6253	4881.89	1338.96	5.67491	0.491035	0.218247	3276.97	24.4251
Ames26742	WX33-16	Yes	1.8777	42.0728	4.382	30.0723	5206.58	1427.12	5.65366	0.423505	0.614963	3599.04	36.0607
Ames26743	WX38-11	Yes	2.19061	47.5525	3.20567	24.4206	4417.22	1542.55	9.15056	0.552556	0.335513	3455.94	38.2241
Ames26744	WXB14	Yes	1.95722	25.3279	2.03181	20.8375	4803.26	1389.98	5.80805	0.364305	0.225556	3680.39	22.0102
Ames26745	WXB6	Yes	2.24071	42.5902	2.13793	21.9418	4452.13	1322.79	7.98146	0.56163	0.0795689	3322.79	33.5426
Ames26746	WXHy	Yes	2.08536	70.8043	2.27061	23.991	4578.64	1394.67	7.623	0.373099	0.137199	3148.57	34.1054
Ames26747	WXI198	Yes	2.23032	39.9316	1.8932	22.0121	5909.82	1370.4	5.05684	0.432982	0.419882	3357.45	31.106
Ames26748	WXI205	Yes	2.01602	23.6802	2.19553	22.634	5552.61	1370.42	5.6053	0.495845	0.70026	3851.31	28.9519
Ames26749	WXK41	Yes	2.25109	67.5853	2.66616	27.5148	5100.22	1542.95	8.51837	0.487508	0.143419	3739.62	35.1685
Ames26750	WXK44	Yes	2.33345	59.3728	1.51819	24.6136	4275.3	1362.45	8.6692	0.390775	0.29838	3434.92	32.5958
Ames26751	WXK55	Yes	2.15123	46.2484	2.3335	27.4921	4506.5	1356.72	5.47728	0.459168	0.398609	3555.88	26.6223
Ames26752	WXK64	Yes	2.47717	26.4485	2.03418		4101.06	1339.7	5.50534	0.554616	0.431061	3041.32	28.7241
Ames26753	WXL289	Yes	2.70863	37.5699	3.70423	19.7724	5210.26	1338.87	9.01562	0.48598	0.242346	3463.23	32.5969
Ames26754	WXL317	Yes	2.52213	37.2577	2.49407	20.2872	4460	1341.66	4.17509	0.534568	0.28519	3034.21	29.0251
Ames26755	WXM14	Yes	2.6113	72.0878	3.20186	24.3994	4601.53	1495.91	6.3481	0.541823	0.27605	3671.51	30.0254
Ames26756	WXOs420	Yes	2.51843	59.5768	2.57593	31.1944	5361.57	1592.54	9.31455	0.461576	0.311008	3847.3	37.6391
Ames26757	WXW22	Yes	2.15631	34.111	2.11818	26.5623	5267.68	1342.03	6.76873	0.579322	0.472354	3590.38	32.0108
Ames26758	WXWF9	Yes	2.51532	31.658	2.56499	27.565	4957.93	1304.17	6.13759	0.358154	0.547541	3499.74	33.4758
Ames26760	A632+/sh2	No	2.02342	29.5769	1.75827	18.849	4434.72	1354.74	5.90837	0.349184	0.235505	3550.22	24.0186
Ames26761	A632sh2/sh2	No	3.21009	67.6273	2.62336	22.7064	6468.72	1782.23	10.5388	0.427261	0.370055	4659.19	32.7579
Ames26762	A632su/su	No	2.22301	36.8739	2.1043	20.0999	4932.24	1406.7	6.81136	0.448352	0.312721	3694.06	26.3914
Ames26763	B84+/su	No	2.00732	33.4709	1.46356	19.7436	4520.71	1277.53	4.75696	0.585538	0.281422	3073.55	26.5607
Ames26764	Mo17+/su	No	2.29498	39.9988	2.90648	24.4337	4436.75	1220.76	5.69986	0.580138	0.0767104	3281.46	30.2307
Ames26765	Oh43su	No	2.50181	87.9158	2.72251	24.1207	6422.72	1407.24	8.59024	0.524709	0.212231	3171.45	34.0021
Ames26766	Oh43sh2	No	2.41423	68.3528	2.76749	26.1648	4454.3	1633.04	11.1842	0.670908	0.471541	3583.04	33.7936
Ames26767	W64Aae	No	2.26974	39.081	2.14938	21.8856	4419.82	1214.39	5.54941	0.349008	0.237173	3316.91	26.4588
Ames26768	W64Aae/wx	No	2.55063	48.9296	2.40946	22.5949	4601.6	1281.76	6.43023	0.338768	0.225348	3493.93	23.4987
Ames26769	B2	Yes	2.00257	24.4261	2.5755	24.7496	4634.96	1254.25	4.73787	0.52755	-0.00148729	3418.19	28.6542
Ames26770	66	Yes	2.30854	42.0826	2.68509	18.3157	4788.11	1258.63	4.934	0.383895	0.498227	3266.02	22.8301
Ames26771	33-16	Yes	2.18774	47.4078	3.33743	23.4131	4809.1	1290.18	5.42723	0.495498	0.583026	3365.94	30.6811
Ames26772	H5	Yes	1.82246	49.3845	2.22682	24.4003	4264.99	1426.87	6.25529	0.569198	0.508867	3619.91	36.0926
Ames26773	H10	Yes	2.25409	26.0334	2.61504	23.1108	4126.19	1247.56	5.19672	0.507689	0.184696	3235.67	29.3674
Ames26774	H14	Yes	2.38277	53.9143	3.45094	32.7132	4976.33	1573.65	8.27135	0.540223	0.386434	3749.17	52.3185
Ames26775	H19	Yes	2.50625	35.7438	1.77973	21.5013	4626.61	1230.51	5.82513	0.438304	0.261627	3406.22	29.1321
Ames26776	H22w	Yes	2.05669	23.3284	2.76669	22.3099	4918.76	1471.11	4.33312	0.566755	0.348963	3498.12	28.1217
Ames26777	H23w	Yes	2.14588	26.9871	2.93238	21.252	4192.47	1252.58	8.96333	0.449875	0.380399	3200.43	35.7227
Ames26778	H26w	Yes	2.35258	62.7343	2.77703	21.2982	3998.02	1266.97	7.14261	0.465684	0.0919572	3301.64	27.9686
Ames26779	H27w	Yes	2.03526	23.638	1.19306	21.9786	3713.76	1384.9	5.51211	0.489366	0.646146	3333.54	31.4213
Ames26780	H28w	Yes	2.43546	33.845	2.29986	22.0508	4025.54	1230.37	5.82612	0.374875	0.141966	3101.99	29.4484
Ames26781	H29w	Yes	2.04565	36.8727	2.29223	20.9015	4029.1	1200.87	5.05691	0.401516	0.0789845	3105.15	29.8244
Ames26782	H30w	Yes	2.1888	28.5816	2.14045	23.1588	4025.66	1349.13	6.41363	0.499868	0.282385	3138.03	34.1342
Ames26783	H41	Yes	2.15248	41.4904	1.83825	27.2835	4436.62	1322.88	6.0004	0.744979	0.319113	3531.42	32.4988
Ames26784	H42	Yes	2.27655	50.9596	2.17423	20.2801	4371.63	1335.58	6.31027	0.572207	0.132218	3466.77	30.7285
Ames26785	H45	Yes	2.29406	29.2523	1.46226	22.0608	5279.12	1195.8	6.00992	0.493048	0.609183	3200.46	30.1081
Ames26786	H46	Yes	2.45321	37.6214	1.81967	29.2297	4873.28	1338.93	6.33002	0.420246	0.558557	3571.85	33.0954
Ames26787	H49	Yes	2.38292	44.9141	2.39875	23.9054	4372.15	1167.53	5.82893	0.425881	0.280176	3189.75	29.0025
Ames26788	H50	Yes	2.74889	53.5056	3.70693	31.1056	4443.16	1740.02	9.61822	0.573882	0.272702	3847.19	44.5255
Ames26789	H51	Yes	2.37838	42.293	3.03251	27.5836	4429.29	1655.93	8.04606	0.584028	0.387005	3344.94	36.4426
Ames26790	H52	Yes	2.16843	44.2579	4.88015	24.1471	4717.36	1410.17	6.70913	0.570372	0.154477	3513.18	33.9223
Ames26791	H55	Yes	1.76456	34.342	1.35948	20.6835	3922.79	1386.54	7.73742	0.357443	0.137768	3002.03	30.3505
Ames26792	H59	Yes	2.53604	29.9769	1.50931	18.0834	4362.06	1273.61	6.63918	0.570698	0.0121612	3111.6	22.6759
Ames26793	H71	Yes	2.14189	32.6845	3.33345	19.3589	4816.58	1260.13	7.76437	0.491237	0.296328	3652.55	31.4511
Ames26794	H73	Yes	2.20079	26.4587	3.85772	20.8632	4141.11	1303.21	3.41042	0.445455	0.140472	3368.37	33.6042
Ames26795	H88	Yes	2.57149	49.36	1.68954	27.3995	5435.06	1469.66	6.93553	0.683374	0.194464	3572.33	35.5153
Ames26796	H93	Yes	2.39842	27.8215	2.08107	22.7551	3970.59	1364.75	6.24993	0.488402	0.343894	3006.99	31.5125
Ames26797	H96	Yes	1.8967	46.5919	1.37977	24.7261	4371.56	1602.97	7.92653	0.378622	0.167917	3449.63	34.4897
Ames26798	H98	Yes	2.18849	44.4183	2.47766	24.2985	3776.64	1226.22	5.61778	0.457245	0.172945	2954.68	29.5317
Ames26799	H101	Yes	1.9446	55.1684	2.26096	19.3677	3454.93	1384.74	6.43253	0.667787	0.0611925	2541.59	25.5588
Ames26800	H106w	Yes	2.13968	31.0793	2.00811	22.2144	4800.41	1152.41	4.52031	0.438003	0.0925617	2991.35	27.4807
Ames26801	H108	Yes	2.60817	33.5268	2.48663	22.707	4264.21	1240.58	4.2076	0.535891	0.0977927	3202.39	27.7248
Ames26802	H109	Yes	2.03151	34.9355	2.24175	21.3511	4895.92	1359.62	5.96021	0.482371	0.154635	3310.17	30.5565
Ames26803	H113	Yes	1.91806	61.2283	2.30459	23.8653	4372.08	1467.78	6.74479	0.421804	0.10307	3534.93	34.9166
Ames26804	H121	Yes	1.98733	22.2627	1.5402	25.2308	3765.34	1480.73	5.83441	0.528007	0.196191	3317.02	24.7962
Ames26805	H122w	Yes	1.97566	34.788	2.10873	29.0244	4253.13	1270.56	5.5884	0.431979	0.536864	2984.18	34.9181
Ames26806	H124w	Yes	2.23014	54.0929	2.43651	22.1232	4374.48	1402.63	10.8162	0.591235	0.595485	3425.43	40.6123
Ames26808	Ill.Hy	Yes	1.76571	51.3155	1.74566	20.0456	3947.29	1297.57	5.71674	0.321517	0.107007	3131.67	31.1821
Ames26813	C5	No	2.4521	67.0749	5.76541	27.9689	6361.67	1493.85	8.1992	0.71111	0.27559	4160.78	38.2786
Ames26909	Mo41	Yes	2.24646	42.467	2.28937	24.6992	4122.64	1314	6.08765	0.453485	0.222246	3247.38	28.6493
Ames27017	CH705-8	Yes	1.83029	42.9989	2.68928	29.2284	4937.56	1300.09	6.04686	0.427816	0.212031	3404.97	34.5779
Ames27018	CH711-10	Yes	2.48347	58.4573	2.55282	27.3373	4336.12	1241.91	8.18492	0.402726	0.330066	3274.83	31.4002
Ames27019	CH732-12	Yes	2.17842	47.2915	3.27596	26.1507	4873.4	1301.91	6.80886	0.574727	0.483163	3415.09	30.6834
Ames27020	CH741-6	Yes	2.42476	40.1203	2.39207	21.7529	4536.26	1427.69	4.89071	0.466973	0.118748	3839.97	29.5889
Ames27021	CH753-4	Yes	2.36774	27.6141	2.41203	17.5867	5055.46	1201.49	4.2653	0.42158	0.0649801	3366.74	22.3009
Ames27024	CL17	Yes	2.13088	42.1249	1.55698	20.6594	4346.68	1213.29	5.71188	0.503973	0.0968379	3280.88	27.6336
Ames27025	CL18	Yes	2.21401	30.9986	1.51275	20.5108	4905.31	1185.27	4.72037	0.459408	0.2065	3437.45	26.5127
Ames27026	CL19	Yes	2.31462	56.375	4.70342	32.0843	5293.18	1611.55	9.47445	0.445942	0.391325	4041.99	46.1713
Ames27028	CL22	Yes	2.14546	25.9935	5.20832	24.3145	5431.82	1251.12	6.74296	0.425055	0.31078	3423.18	32.9158
Ames27029	CL27	Yes	2.10809	32.9758	2.91781	20.8387	4231.05	1119.19	5.04928	0.542114	0.127691	3235.08	28.1867
Ames27031	CM99	Yes	2.22206	18.9838	1.72391	21.3319	5379.34	1440.73	6.09602	0.447746	0.264517	4038.16	27.6318
Ames27032	CM145	Yes	2.02998	36.2077	1.62007	27.1111	4529.94	1250.07	4.66492	0.454366	0.49288	3429.49	30.8455
Ames27034	CM155	Yes	2.40813	23.406	2.70832	21.5036	5039.27	1521.85	6.42653	0.500111	0.259231	3990.98	28.1428
Ames27036	CM182	Yes	2.2732	65.5122	3.52925	24.5667	4119.14	1387.38	7.35622	0.412548	0.0972376	3379.21	30.0189
Ames27037	CM234	Yes	2.20874	50.7836	1.54747	21.9965	4551.5	1286.21	6.09186	0.54238	0.237969	3232.5	25.6498
Ames27038	CMV3	Yes	2.17961	41.7611	1.62463	25.0112	4562.11	1385.13	5.71281	0.443048	0.110205	3523.02	29.6133
Ames27039	CO117	Yes	2.3369	35.2518	2.4567	22.6256	4572.32	1426.27	5.53794	0.530603	0.123443	3514.46	32.2207
Ames27040	CO120	Yes	2.5952	62.2557	2.4715	20.9015	4199.11	1440.72	9.56132	0.360584	0.193071	3241.7	30.1908
Ames27041	CO150	Yes	2.06986	45.5952	1.16852	23.295	4082.45	1248.88	5.54364	0.68145	0.328503	2897.95	33.3577
Ames27042	CO158	Yes	2.60809	41.7474	2.00426	22.3545	4005.96	1409.59	8.77665	0.388147	0.112871	3241.25	30.0804
Ames27043	CO192	Yes	2.24065	32.5024	1.57283	24.5558	4470.35	1594.3	5.64775	0.49458	0.231461	3749.58	26.9662
Ames27044	CO216	Yes	1.70197	37.6978	4.34534	27.2902	4153.19	1388.42	6.67579	0.427221	0.260996	3138.32	31.8863
Ames27045	CO220	Yes	2.04452	28.4413	2.73616	20.6571	4366.71	1329.57	7.42604	0.442621	0.381809	3342.44	34.8823
Ames27047	CO237	Yes	2.11164	30.8596	2.47301	24.9454	4078.27	1346.31	4.79524	0.44134	0.175843	2956.46	32.5089
Ames27048	CO245	Yes	2.10736	20.7513	2.60918	22.8612	5000.84	1205.73	5.6796	0.582602	0.157071	3365.25	27.5957
Ames27049	CO252	Yes	2.08932	53.4731	3.37862	19.2517	4283.38	1250.36	6.06164	0.641187	0.180509	3401.2	28.0254
Ames27050		Yes	2.75052	59.9976	4.83466	34.7942	4447.11	1407.79	10.5101	0.628402	0.280161	3403.96	41.758
Ames27051	CO256	Yes	2.19891	34.7666	1.62365	23.6454	5002.39	1366.97	6.8454	0.437566	0.118843	3612.05	31.4694
Ames27052	CO257	Yes	2.1276	40.7892	1.50678	21.4197	4523.62	1451.44	5.96927	0.503354	0.142085	3191.67	24.6507
Ames27053	CO258	Yes	1.74021	28.3542	1.7941	21.2071	3998.1	1174.93	6.02742	0.496871	0.324477	2881.32	19.3286
Ames27056	CSJ2	Yes	2.33481	33.6168	4.85802	23.0265	4625.91	1456.94	9.40077	0.490814	0.152401	3558.41	36.5332
Ames27057	CSJ3	Yes	1.86799	35.1288	2.32516	18.6987	4472.61	1280.55	5.22638	0.485674	0.25848	3128.03	27.4221
Ames27062	A6	Yes	1.64826	23.2653	2.33567	21.3572	4769.84	1345.96	6.1516	0.310803	0.139926	3459.2	29.6964
Ames27065	B73Htrhm	Yes	2.4189	31.7686	1.78285	23.4633	4548.93	1181.09	4.04295	0.39719	0.202362	3032.71	30.9528
Ames27066	B164	Yes	1.71138	35.1517	1.64545	22.5964	3700.12	1223.5	7.6043	0.574927	0.178982	3145.61	29.3067
Ames27069	CH701-30	Yes	2.52286	45.1839	1.72103	28.7931	4468.37	1622.98	8.41267	0.591485	0.551631	3697.29	39.4389
Ames27070	CM7	Yes	2.16649	39.5044	2.7082	22.0976	4253.4	1360.48	5.59695	0.523986	0.0764505	3368.61	31.2747
Ames27079	CML91	Yes	2.21051	36.2503	1.72016	24.0667	3979.81	1291.19	6.0507	0.442289	0.112286	3133.06	31.6519
Ames27080	CML92	Yes	2.0795	57.568	1.74179	24.9564	4891.04	1103.11	4.37376	0.571085	0.050189	3113.82	28.5577
Ames27081	CML103	Yes	2.19603	52.4708	2.35494	25.041	4832.3	1278.53	5.78562	0.445967	0.216472	3412.33	36.0625
Ames27082	CML108	Yes	2.21145	36.3309	1.87683	28.2814	4772.92	1340.2	4.5958	0.408215	0.109644	3328.38	31.1076
Ames27083	CML154Q	Yes	2.32819	41.9633	2.24797	22.019	5019.03	1497.39	5.47356	0.593629	0.49715	3924.36	28.9675
Ames27084	CML157Q	Yes	2.73236	49.6713	1.73644	21.0756	4498.07	1396.75	5.3762	0.300534	0.109346	3531.36	32.4224
Ames27085	CML158Q	Yes	2.65932	40.8232	3.08791	22.0908	5671.39	1484.9	6.16924	0.506594	0.161169	3837.46	36.2004
Ames27086	CML218	Yes	2.30375	56.1829	1.34563	26.6381	3803.21	1345.7	6.42306	0.540973	0.165006	2926.44	26.7298
Ames27087	CML220	Yes	2.20752	47.8209	2.01688	22.6304	4588.43	1395.23	3.45988	0.430576	0.663277	3197.06	34.6363
Ames27089	CML238	Yes	2.77026	87.5832	2.35746	26.3679	5885.09	1655.71	7.75525	0.392418	0.284835	3840.44	31.1981
Ames27093	CML311	Yes	2.56937	41.2564	3.23138	23.7748	5210.83	1345.62	5.3488	0.401331	0.306418	3638.07	34.6566
Ames27096	CML322	Yes	2.1813	39.3073	3.9268	26.0417	4577	1347.47	6.34084	0.592988	0.300845	3695.65	37.3995
Ames27097	CML323	Yes	2.11802	47.2531	1.52588	27.5225	4477.47	1350.78	6.55746	0.444045	0.286172	3432.37	30.0144
Ames27098	CML328	Yes	2.09314	39.7668	1.9885	25.82	4561.14	1292.17	6.79978	0.537618	0.189301	3430.95	35.1818
Ames27101	CML333	Yes	1.9202	54.047	3.78721	29.5965	4234.47	1260.99	5.8445	0.44542	0.354853	3339.57	36.889
Ames27104		Yes	2.0505	55.4528	2.02343	25.1561	5137.56	1483.56	5.86955	0.503121	0.161159	3632.69	32.2216
Ames27105	CO106	Yes	2.32865	49.7124	2.69983	22.9113	4174.43	1336.21	5.51579	0.593054	0.198697	3299.5	35.4966
Ames27106	CO125	Yes	2.25003	38.3201	2.55715	21.928	4193.65	1413.05	6.7896	0.48564	0.000956419	3132.09	29.0158
Ames27107	CO255	Yes	2.14609	40.4101	2.07098	26.0041	3855.79	1369.11	6.73063	0.569785	0.189128	3100.81	33.8138
Ames27110	E2558W	Yes	2.07009	21.9722	1.4826	25.802	4263.93	1170.93	3.59314	0.406837	0.155617	2906.78	25.2516
Ames27111	EP1	Yes	2.04906	36.3106	5.56645	29.0433	5129.58	1477.61	8.26119	0.517497	0.526428	3974.25	39.6783
Ames27112	F2834T	Yes	2.263	48.0304	2.07526	15.9371	5487.94	1316.95	6.61808	0.590188	0.153243	3774.47	28.0444
Ames27113	GT112	No	1.9197	21.7102	3.77093	23.117	4149.18	1237.78	5.33178	0.420673	0.18779	3062.31	30.4785
Ames27114	H91	Yes	2.44497	30.2272	1.96529	22.8294	5301.09	1538.27	8.31449	0.401015	0.342924	3986.21	26.6082
Ames27115	I29	No	2.37286	48.2159	3.84127	24.2113	3681.58	1297.64	5.45623	0.549651	0.153042	3221.76	32.9421
Ames27116	I137TN	Yes	2.15067	46.2248	2.161	22.528	4164.98	1274.25	6.47738	0.508483	0.0838474	3176.52	32.3407
Ames27117	Ia5125B	No	2.39205	54.6108	4.17342	27.6856	5302.43	1291.38	6.4787	0.684441	0.25315	3275.83	35.5282
Ames27118	Il14H	No	2.59489	42.9923	2.26414	20.4533	6310.69	1249.15	5.0476	0.486816	0.0998852	3484.25	26.3418
Ames27119	Il101T	No	2.41053	36.1028	2.19666	32.6255	5619.22	1415.21	7.48247	0.644455	0.285935	3695.2	43.1869
Ames27120	Il677a	No	2.47501	87.0458	3.12189	26.7707	6355.22	1390.17	8.03533	0.538506	0.211854	3342.48	28.0567
Ames27121	K64	Yes	2.12171	16.0102	1.73934	19.0874	4530.6	1401.16	6.08441	0.525507	0.517067	3387.69	29.6661
Ames27122	K148	Yes	2.43428	44.8228	1.76493	21.9308	4169.16	1481.46	7.39679	0.461986	0.235687	3436.9	33.7112
Ames27125	Ki21	Yes	2.16359	34.5522	3.69947	24.2672	4525.95	1324.11	6.205	0.488128	0.0953135	3339.2	32.0329
Ames27126	Ki43	Yes	2.05502	70.7354	2.4638	23.4728	4835.18	1560.34	7.7093	0.480934	0.144609	3582.69	29.2353
Ames27130	Ky21	Yes	2.06904	65.1536	3.84959	20.3976	4631.97	1353.05	5.24466	0.614683	0.0983394	3407.64	27.8619
Ames27131	Ky226	Yes	2.07959	35.8745	1.84997	24.3489	3605.61	1499.73	8.03988	0.512866	0.0754733	3345.97	26.5576
Ames27132	L578	Yes	2.24141	72.1057	2.99362	28.1457	4758.81	1488.64	7.25142	0.47089	0.288385	3675.38	36.1375
Ames27133	M37W	Yes	2.12279	50.4473	1.77008	26.6456	4802.52	1354.29	4.67749	0.422725	0.146325	3466.85	30.8417
Ames27134	M162W	Yes	2.18612	37.037	2.37891	21.2548	4362.79	1283.05	5.69823	0.541327	0.148175	3138.03	32.0594
Ames27136		Yes	2.13862	42.7046	1.57185	23.0907	4667.72	1304.76	5.70465	0.424244	0.110067	3256.07	28.6364
Ames27137	N6	Yes	1.86775	33.7997	2.05458	22.6619	3774.63	1331.4	6.36318	0.458811	0.0685834	2971.12	27.1622
Ames27138	N28Ht	Yes	2.26017	23.937	1.62016	20.1216	4093.08	1375.1	5.34857	0.460033	0.205666	3130.47	32.772
Ames27140	NC260	Yes	2.18532	36.2361	1.62908	28.8227	4836.46	1342.56	7.75639	0.546873	0.1481	3415.98	38.9805
Ames27141	NC290A	Yes	2.45151	35.5733	3.1067	26.5071	4244.08	1225.62	4.04817	0.44466	0.214054	2885.65	26.4219
Ames27142	NC292	Yes	1.8768	26.7051	1.7206	22.4554	4212.19	1179.92	4.26026	0.399693	0.177982	2968.56	29.9643
Ames27143	NC294	Yes	1.87329	36.903	2.02203	17.4815	4130.77	1190.91	4.54765	0.362927	0.129507	2916.33	26.4713
Ames27144	NC296	Yes	2.08765	33.0434	1.31085	23.8201	4317.15	1155.33	6.22069	0.448221	0.174708	2931.46	30.587
Ames27145	NC296A	Yes	2.16393	28.5527	1.46157	22.4119	4147.37	1120.69	4.63599	0.396637	0.108941	2710.86	29.435
Ames27147	NC302	Yes	2.09085	41.4577	1.88048	20.8976	4024.68	1096.65	5.28976	0.408081	0.082716	2920.42	24.1499
Ames27148	NC304	Yes	2.05524	40.7528	2.04739	23.7213	4173.33	1127.9	3.83557	0.469303	0.127425	3117.83	24.9981
Ames27149	NC306	Yes	2.07628	50.9687	2.01465	24.1721	5089.87	1240.66	4.54375	0.534545	0.223182	3208.02	29.2461
Ames27150	NC308	Yes	1.96386	26.9789	1.42431	22.7402	4250.08	1125.71	2.67988	0.491003	0.182195	3003.54	26.383
Ames27151	NC310	Yes	1.95056	35.1222	2.00649	21.2563	4203.8	1223.71	7.23701	0.396271	0.0983957	3069.96	30.586
Ames27152	NC312	Yes	2.31488	45.7284	1.95891	24.5939	4406.65	1196.64	4.53652	0.577186	0.235516	3043.68	29.8594
Ames27153	NC314	Yes	2.4283	29.2944	1.6126	23.5167	4584.67	1322.21	6.17034	0.521393	0.257104	3337.23	36.0115
Ames27154	NC316	Yes	2.27636	31.1743	2.41173	26.569	4620.05	1260.75	5.21078	0.45059	0.150673	3331	35.2822
Ames27155	NC318	Yes	2.75686	59.1798	2.98073	20.0713	3885.75	1378.31	6.29445	0.417067	0.341336	3261.77	31.6919
Ames27156	NC320	Yes	2.01321	56.1468	2.26205	22.0424	4073.07	1254.29	4.7737	0.509314	0.191981	3098.35	27.1442
Ames27157	NC322	Yes	2.24357	56.0189	2.43931	18.0003	3494.23	1182.42	5.3244	0.48633	0.191257	2736.69	25.7877
Ames27158	NC324	Yes	2.07534	36.1476	1.95435	20.8135	4299.83	1218.34	6.17403	0.45484	0.127298	3125.92	27.8711
Ames27159	NC326	Yes	1.99353	33.5608	1.38486	23.0153	4136.96	1054.1	4.18889	0.43202	0.158466	2709.3	25.7102
Ames27160	NC328	Yes	2.1218	36.0288	1.76422	21.8731	4029.19	1172.78	4.57588	0.392261	0.142152	2865.33	31.8427
Ames27161	NC330	Yes	2.06289	38.4452	1.46981	23.6396	4025.36	1162.02	4.86296	0.405798	0.216508	2977.28	28.3788
Ames27162	NC332	Yes	2.32635	71.5176	2.50527	18.9693	3594.85	1260.75	6.19997	0.526116	0.243864	2956.13	27.1288
Ames27163	NC334	Yes	2.37451	67.3693	2.48561	21.7676	3775.5	1364.62	6.89705	0.515463	0.261857	3141.58	31.1588
Ames27164	NC336	Yes	1.89358	39.0439	1.59341	22.6777	4589	1304.68	6.78211	0.417278	0.134439	3145.28	27.9968
Ames27165	NC338	Yes	2.19014	54.2538	1.77187	20.913	4364.19	1127.98	6.53504	0.441177	0.0349052	3006.02	26.4347
Ames27166	NC340	Yes	2.07472	55.522	1.74941	22.7902	4421.68	1153.14	5.3388	0.426219	0.0901301	3220.04	29.0701
Ames27167	NC342	Yes	2.15651	40.2106	3.26732	25.6492	4322.54	1320.46	6.02669	0.426053	0.297722	3343.97	29.7828
Ames27168	NC344	Yes	2.27883	37.7382	2.51206	18.8954	4146.52	1240.76	5.35594	0.364116	0.11706	2942.04	27.9477
Ames27169	NC346	Yes	1.70412	36.642	1.19302	22.1824	4685.85	1142.82	6.55705	0.4213	0.133751	2897.84	26.8464
Ames27170	NC348	Yes	2.40521	38.6952	1.86935	27.7055	4880.45	1228.25	7.97142	0.435724	0.438488	3453.44	36.611
Ames27172	NC352	Yes	2.27136	38.7205	1.38862	20.3241	4099.99	1131.58	5.12634	0.415755	0.0929438	2837.15	29.4285
Ames27173	NC354	Yes	2.07869	32.445	1.75882	23.2586	4633.9	1153.39	4.35664	0.494172	0.0723382	3006.02	28.4063
Ames27174	NC356	Yes	2.08295	31.4962	2.19225	22.1316	4451.33	1211.54	7.2079	0.363467	0.337672	3326.31	30.9977
Ames27175	NC358	Yes	2.0663	24.0534	2.49886	16.8698	4071.78	1120.67	6.77803	0.413074	0.0559588	3079.57	22.1421
Ames27176	NC360	Yes	2.13891	29.2296	3.14193	24.329	3891.22	1285.83	5.52807	0.437798	0.0972866	3177.95	31.1295
Ames27177	NC362	Yes	2.22273	28.4788	2.11867	24.9416	4411.26	1203.51	3.87046	0.446004	0.180421	2946.78	27.2015
Ames27178	NC364	No	2.36641	46.0742	3.08074	26.7902	4866.09	1315.73	6.08516	0.492652	0.210011	3170.42	31.6004
Ames27179	NC366	Yes	2.48147	35.5362	2.31046	22.0238	4306.37	1313.18	4.44988	0.453538	0.214568	3161.32	34.9902
Ames27180	NC368	Yes	2.13455	32.8499	1.80649	20.1884	4260.61	1208.12	5.15848	0.503642	0.144464	3184.96	25.4332
Ames27181	NC370	Yes	2.14778	49.4315	2.47197	25.9573	4247.16	1414.78	5.15794	0.53807	0.22017	3411.92	30.0166
Ames27182	NC372	Yes	2.0837	34.0655	2.05744	22.0818	4355.31	1163.58	3.52316	0.446827	0.208968	2787.03	26.3809
Ames27183	Oh43E	Yes	2.07194	51.3064	2.83831	23.237	4483.5	1518.8	8.30613	0.483072	0.440854	3102.93	29.7379
Ames27184	Pa762	Yes	2.49314	79.188	3.82164	22.2413	4203.27	1358.16	7.39065	0.61349	0.463782	2931.14	31.5245
Ames27185	Pa875	Yes	2.26185	36.7116	1.48364	30.7981	5265.12	1390.01	6.99972	0.565986	0.0992038	3594.52	31.7825
Ames27187	R4	Yes	2.14418	43.9006	2.65707	22.2754	4833.9	1431.71	8.21778	0.531602	0.217686	3394.88	31.5472
Ames27188	SA24	No	2.25635	32.261	2.21883	19.8212	3987.41	1427.43	6.36776	0.553922	0.173983	3082.28	36.4784
Ames27189	SC55	Yes	2.34936	33.1817	1.84517	24.6347	4164.01	1406.62	6.27912	0.48783	0.198274	3308.31	29.7681
Ames27190	T234	Yes	1.99209	37.0139	1.97583	19.7668	4419.12	1337.44	5.26647	0.608518	0.0973152	3351.08	29.8663
Ames27191	U267Y	Yes	2.0303	78.3977	1.8786	23.2414	4891	1472.17	5.26767	0.519358	0.0701889	3965.77	28.4599
Ames27192	Va14	Yes	2.22961	43.4419	1.79877	28.4069	5160.74	1489.45	7.30269	0.482328	0.165758	3716.2	36.4444
Ames27194	W401	Yes	2.11896	32.9498	1.56393	23.9574	4069.31	1312.76	6.19563	0.446294	0.545546	3250.07	26.5003
Ames27196	Yu796_NS	Yes	1.91922	36.408	2.66632	20.5193	3968.04	1067.18	4.84475	0.562576	0.142306	3046.88	28.865
Ames27197	GEMN-0044	Yes	2.11972	39.3706	2.49225	29.3397	4881.73	1369.26	7.50701	0.522154	0.414671	3522.11	32.3381
Ames27198	GEMN-0045	Yes	1.87278	27.315	1.57202	30.4528	4444.71	1359.11	5.35381	0.592857	0.216347	3471.43	28.4387
Ames27199	GEMN-0046	Yes	2.19952	32.5543	2.15466	31.5087	5012.31	1453.11	7.42786	0.593476	0.332799	3632.52	33.34
Ames27200	GEMN-0047	Yes	2.18611	41.4107	2.31871	26.3904	4094.07	1310.48	5.22303	0.48598	0.436574	3079.06	31.8431
Ames27201	GEMN-0048	Yes	2.37403	31.6999	1.67009	24.2071	4524.01	1319.68	5.72675	0.441791	0.298844	3276.38	27.879
Ames27202	GEMS-0049	Yes	2.16422	20.3301	1.52137	24.0723	4335.13	1403.68	6.81263	0.491458	0.117639	3275.26	26.5364
Ames27203	GEMS-0050	Yes	2.04582	34.7809	1.77038	21.2767	4308.89	1154.77	6.04222	0.378144	0.169291	2937.72	25.8363
Ames27204	GEMS-0051	Yes	2.18518	26.9991	1.60826	22.6946	4609.27	1274.58	5.03723	0.511147	0.0778417	3402.19	30.193
Ames27205	GEMS-0052	Yes	2.11531	27.6238	1.62389	18.4677	4850.19	1307.16	4.16593	0.471184	0.183048	3276.19	28.2448
Ames27206	GEMS-0053	Yes	2.20615	32.0041	1.91209	23.4399	4649.23	1262.68	4.60976	0.465373	0.221148	3265.55	31.6291
Ames27207	GEMS-0054	Yes	2.04336	45.5903	1.83472	24.4658	3841.29	1292.92	5.76316	0.441703	0.196332	3156.76	30.4557
Ames27208	GEMS-0055	Yes	1.95496	37.7256	3.2158	26.8523	4761.63	1327.07	7.48509	0.404548	0.137073	3550.26	35.0647
Ames27209	GEMN-0056	Yes	1.96637	41.3712	1.97638	23.8318	4518.27	1222.49	5.96469	0.492463	0.082808	3066.81	29.4684
Ames27210	GEMN-0057	Yes	2.47091	46.3972	2.25888	26.3962	4650.75	1303.49	6.2473	0.44677	0.231148	3433.55	31.3118
Ames27211	GEMN-0058	Yes	2.54095	60.2801	2.22115	31.8658	5199.09	1488.23	7.55543	0.446417	0.433152	3471.3	32.9795
Ames27212	GEMN-0059	Yes	2.02383	31.0415	2.42653	21.045	4180.28	1231.27	4.63217	0.511116	0.109754	2877.91	25.215
Ames27213	GEMN-0060	Yes	2.11214	36.1483	1.57379	17.9436	4243.74	1193.88	4.53006	0.493936	0.00919347	2902.38	20.3109
Ames27214	GEMS-0061	Yes	2.11824	35.0512	2.10534	27.6676	4485.86	1388.39	5.9781	0.561019	0.380941	3332.23	31.2869
Ames27215	GEMS-0062	Yes	1.96484	51.2747	2.09993	22.4921	4251.64	1308.46	5.80357	0.440448	0.143692	3268.37	29.6223
Ames27216	GEMS-0063	Yes	2.09715	41.4252	2.13866	23.6627	4244.8	1322.33	5.87149	0.400617	0.222616	3168.7	29.2287
Ames27217	GEMS-0064	Yes	2.02069	30.8255	1.79152	25.34	4277.31	1326.15	5.94078	0.462769	0.271899	3206.29	36.0913
Ames27218	GEMS-0065	Yes	2.35719	34.1675	2.03439	26.3606	4385.45	1412.72	4.98394	0.401905	0.309664	3479.93	32.1391
Ames27219	GEMS-0066	Yes	2.25282	26.3022	2.97041	22.2051	4543.4	1352.06	4.16787	0.471473	0.303058	3356.32	31.7462
Ames27258	CML11	Yes	2.04528	36.0242	1.71248	17.9735	4234.84	1289.17	4.60951	0.429057	0.0624656	3140.71	24.0606
Ames27261	NC298	Yes	1.98073	30.3773	1.60566	23.8301	4569.57	1171.05	5.40889	0.45477	0.105083	3129.48	30.3633
Ames27444	Il731a	No	2.36263	82.0345	3.93769	22.9732	6457.04	1358.32	6.98282	0.453793	0.258458	3360.86	26.0162
Ames27445	Il767b	No	2.33175	72.9711	3.75302	25.7403	5962.21	1384.1	8.61408	0.486433	0.474756	3271.87	32.9891
Ames27446	Il778d	No	2.80044	77.1968	2.76448	27.5207	6837.49	1313.63	6.24855	0.48181	0.145656	3470.6	34.6017
Ames27447	Il779a	No	2.3343	82.8897	4.34907	25.8805	5962.82	1321.13	6.42388	0.513452	0.0874539	3399.58	29.2539
Ames27450	LH143Maintainer	Yes	2.06093	29.0265	1.82583	18.6648	4317.1	1220.4	7.16333	0.418103	0.102895	3440.87	27.6076
Ames27451	A632.75A1A2C1R1-rB1Pl1	Yes	2.34212	28.2696	1.59805	16.1638	4477.92	1253.87	5.59095	0.316342	0.287486	3383.72	24.6503
Ames28170	A619E	Yes	2.66181	36.9448	1.86497	22.9871	5086.36	1412.54	4.81642	0.376192	0.401105	3420.95	33.1267
Ames28185	CML77	Yes	2.25441	26.8435	2.01413	22.6385	4827.12	1270.1	4.52199	0.475441	0.114183	3418.4	31.105
Ames28186	P39Goodman-Buckler	No	2.0973	35.9734	2.77134	24.5612	4726.32	1318.8	4.70568	0.536638	0.184991	3214.6	33.5186
Ames28290	C49	Yes	2.05082	42.8085	2.10663	31.9241	4285.58	1423.96	7.01358	0.633681	0.544324	3473.77	33.5609
Ames28291	Hi27Goodman-Buckler	Yes	2.52034	42.4496	1.68091	27.7752	4676.67	1529.62	7.00132	0.440638	0.0937297	3724.4	32.7173
Ames28361	Mo402	Yes	2.31442	30.956	2.12531	24.7908	4846.57	1281.12	5.0393	0.411244	0.130187	3039.31	30.6618
Ames28362	Mo403	Yes	2.11936	40.9966	3.54881	22.9991	3853.58	1375.2	7.74187	0.58709	0.417791	3016.03	37.141
Ames28364	IA2132Goodman-Buckler	No	2.36422	42.2447	5.06862	35.4821	4823.6	1454.92	7.20084	0.651804	0.113477	3718.31	42.635
Ames28365	CI91BGoodman-Buckler	Yes	1.86904	30.1026	2.58704	24.9936	4102.5	1344.32	5.96184	0.411464	0.129467	2988.19	26.5321
Ames28366	N7AGoodman-Buckler	Yes	2.0093	28.3328	2.28697	19.5587	3965.42	1216.79	3.40839	0.623943	0.538061	2962.12	27.7381
Ames28367	CI7Goodman-Buckler	Yes	1.91404	42.6486	2.17276	25.4669	4317.66	1498.45	11.6921	0.455143	0.610924	3262.11	31.1249
Ames28411	NC258A	Yes	2.30913	36.3435	2.53302	22.2109	4784.93	1423.22	7.13517	0.392292	0.334939	3397.22	28.3859
Ames28412	NC262A	Yes	2.07929	18.3531	2.64697	26.1161	4459.6	1349.7	4.82932	0.416838	0.256591	3253.7	31.3139
Ames28413	NC262B	Yes	2.20316	31.4511	2.93034	23.1832	4164.55	1205.82	4.75754	0.477185	0.213008	3006.71	29.0896
Ames28414	NC266	Yes	2.23766	36.4036	1.85255	29.4951	5053.4	1425.11	5.14417	0.763024	0.273337	3735.75	34.4984
Ames28415	NC266B	Yes	2.071	33.194	1.3554	27.4221	4527.69	1237.59	4.43225	0.519881	0.194409	3243.78	29.3448
Ames28416	NC268A	Yes	2.07328	40.0795	1.7996	25.2975	4704.39	1304.76	5.07168	0.478921	0.258012	3277.7	30.999
Ames28417	NC270	Yes	2.08785	33.132	1.45232	22.77	4263.89	1273.03	6.0513	0.491824	0.131633	3193.57	31.7294
Ames28418	NC276	Yes	2.07371	43.517	2.04217	31.6079	4618.88	1363.99	4.8037	0.552953	0.343943	3082.69	39.1317
Ames28419	NC278	Yes	2.27812	37.9187	1.65366	25.9672	5006.77	1326.41	5.03572	0.435479	0.0960613	3223.73	31.8026
Ames28420	NC278A	Yes	2.34553	37.607	1.60501	22.9878	4740.83	1222.72	3.68241	0.526185	0.0362209	2998.64	27.9067
Ames28421	NC280	Yes	2.03067	30.261	2.24583	21.4517	4430.18	1241.75	4.59805	0.436846	0.128639	3164.42	30.6776
Ames28422	NC282	Yes	1.89022	23.6223	2.53487	21.5302	4467.2	1180.62	2.79373	0.456177	0.11585	3077.11	32.7668
Ames28423	NC284	Yes	2.25227	35.647	2.08794	22.4061	4564.16	1138.69	4.27039	0.423542	0.154755	2846.52	32.5462
Ames28425	NC288	Yes	2.14059	40.0672	2.76604	25.5528	3777.73	1209.36	5.85244	0.562508	0.210424	3152.69	31.7863
Ames28426	NC290	Yes	2.27948	30.1712	3.43334	25.1888	4520.67	1249.06	4.91358	0.472742	0.238378	3135.41	29.3875
Ames28927	Mo27W	Yes	1.92539	39.9797	2.63964	23.0917	4616.5	1541.41	7.30025	0.498081	0.195927	3842.02	29.8946
Ames28928	Mo28W	Yes	2.44323	17.1638	2.35936	24.4572	4501.06	1577.29	5.48821	0.502809	0.0703763	3915.46	27.9504
Ames28929	Mo29W	Yes	2.19703	29.2288	1.57056	20.9778	3664.76	1364.18	4.94216	0.411778	0.155215	2934.58	25.707
Ames28930	Mo30W	Yes	1.87111	43.5694	2.59731	19.3349	4353.08	1230.76	4.33297	0.416891	0.140434	3255.13	25.1064
Ames28931	Mo31W	Yes	2.0291	36.2578	1.87656	20.2902	4436.91	1369.98	6.2333	0.621763	0.0739668	3296.96	30.8711
Ames28932	Mo32W	Yes	1.7404	57.8815	1.78305	22.5819	4545.35	1359.16	6.74634	0.428651	0.0530845	3748.49	23.9559
Ames28933	Mo33W	Yes	2.40378	44.8167	3.64863	21.4476	4031.23	1426.62	6.38028	0.442632	0.109731	3378.98	29.6037
Ames28934	Mo36	Yes	2.26008	35.8355	3.20507	23.9845	5040.47	1406.69	5.5494	0.330467	0.336629	3252.36	31.3526
Ames28936	Mo38	Yes	2.0196	24.1406	2.40789	20.6429	4334.49	1211.65	5.21736	0.38864	0.269657	2947.7	26.8784
Ames28937	Mo39	Yes	2.09847	40.1091	2.56197	19.2172	4493.56	1301.57	5.30973	0.440964	0.369169	3102.33	28.356
Ames28938	Mo43	Yes	2.19432	34.423	2.13998	26.4724	4795.27	1316.63	6.64703	0.490119	0.250134	3585.39	30.0569
Ames28939	Mo44	Yes	2.17447	39.1381	2.37352	25.8141	4473.78	1264.98	6.78339	0.481093	0.153604	3154.99	34.1135
Ames28941	Mo502W	Yes	2.07693	36.6658	2.24788	24.2469	4028.97	1307.93	4.88342	0.537954	0.148634	3316.38	32.8869
Ames28942	Mo506W	Yes	2.29149	49.9362	1.73623	19.3888	3825.14	1478.86	5.2564	0.494722	0.091691	3373.13	26.3363
Ames28943	Mo508W	Yes	2.07728	52.8093	2.5933	20.4493	3819.11	1296.4	7.64426	0.459759	0.164969	3114.01	33.7231
Ames28945	Mo511W	Yes	2.00093	26.3312	2.4623	24.2102	3907.41	1255.4	7.69921	0.458358	0.438019	3150.03	31.3446
Ames28946	Mo512AW	Yes	2.56937	54.5889	2.12629	19.3233	4099.06	1416.04	8.34122	0.494842	0.253312	3082.48	31.0883
Ames28947	Mo512BW	Yes	2.448	36.4467	1.9793	21.0841	3657.84	1498.68	6.92971	0.400936	0.171475	3267.58	26.2265
Ames28948	CI4A	Yes	1.97633	23.8173	2.04189	23.4126	4594.47	1336.03	4.46549	0.404457	0.169436	3529.82	33.5564
Ames28949	CI12	Yes	2.16969	37.0603	2.8692	24.5598	4568.03	1325.6	4.8118	0.489484	0.28214	3278.36	35.412
Ames28950	CI24	Yes	1.99685	43.6273	2.23649	24.9634	4030.13	1264.09	5.1392	0.537382	0.155405	2974.14	27.0154
Ames28951	CI42B	Yes	1.8777	42.5891	2.76194	21.376	4286.24	1296.7	5.95369	0.401662	0.276667	2857.16	28.7795
Ames28954	CI93A	Yes	2.3841	32.4503	2.54169	26.9486	4991.99	1498.55	5.57437	0.595092	0.0764718	3605.01	38.766
Ames28970	AD147DS	No	2.52156	52.5739	2.19085	21.0948	3922.42	1216.25	6.27175	0.505102	0.248766	3097.7	36.3149
Ames28971	AD139DS	No	2.33897	63.0203	2.67648	23.671	4206.78	1334.45	7.04233	0.32283	0.0996648	3222.51	34.8367
Ames28972	AD123DS	No	2.09233	63.5084	3.96029	22.4606	3795.71	1354.34	10.384	0.531617	0.265441	2903.32	42.1406
Ames28973	AD175	No	2.20586	39.6301	2.14552	20.7906	3742.75	1396.09	8.76974	0.354712	0.272889	3069.25	34.4969
Ames28975	AD147	No	2.15905	57.3112	3.28099	24.9781	4099.29	1207.29	9.57892	0.406965	0.293781	3155.29	38.2104
Ames28976	AD139DS-2	No	2.57609	42.3472	1.93921	21.8917	4026.71	1421.9	10.377	0.395374	0.312184	3120.98	34.5816
Ames28977	AD316DS	No	2.26156	48.5439	2.72202	18.8377	4059.79	1330.36	9.2379	0.456701	0.671745	3222.21	45.3768
Ames28978	AD238DS	No	2.17803	47.2721	2.66878	21.371	4942.33	1471.08	9.54973	0.408938	0.995604	3551.3	35.2715
Ames28979	AD230DS	No	2.57089	39.975	2.10568	19.5095	3854.75	1250.52	7.27666	0.325336	0.137199	3019.18	39.3751
Ames28980	AD352	No	2.23078	51.2169	2.40455	21.7381	4009.18	1338.95	9.56162	0.527581	0.295584	3231.59	40.301
Ames28981	AD157DS	No	2.40864	62.155	1.45213	20.7736	4336.77	1524.85	8.87059	0.401458	0.138009	3483.17	44.0294
Ames28982	AD187-1	No	2.39316	43.8805	2.50817	20.7496	4185.1	1284.08	10.0054	0.368647	0.517394	3116.16	37.3585
Ames28983	AD187-2	No	2.8239	48.9243	3.77881	21.5288	4106.16	1305.44	10.879	0.458163	0.396391	3141.01	38.6538
Ames28984	AD284	No	2.6024	62.0143	1.8286	20.2359	3573.99	1390.27	12.0998	0.392373	0.512481	3141.13	35.3716
Ames28985	AD188L	No	2.00673	42.434	3.19157	20.3002	3656.93	1365.62	7.37706	0.445648	0.291107	3223.4	36.2633
Ames28986	AD402DS	No	2.12945	28.9994	2.98232	19.8126	4067.82	1226.51	6.05757	0.452595	0.197614	3069.22	32.5899
Ames28987	AD233	No	2.23686	61.2134	3.38579	20.5208	3848.62	1312.6	7.87769	0.474383	0.164389	3358.84	36.1646
Ames28988	AD26DS	No	2.57463	39.6574	4.01584	26.1896	4541.16	1463.57	9.74247	0.474484	0.427283	3475.32	44.3104
Ames28989	ADH10	No	2.1825	43.1159	1.96804	16.6388	3804.59	1213.44	7.20913	0.424848	0.136399	2988.68	35.6803
Ames28990	AD11DS	No	2.17696	43.7841	1.78916	18.9018	3853.86	1350.2	8.1867	0.391587	0.3248	2889.59	31.8719
Ames28991	AD330	No	2.1166	43.9774	2.39593	23.9523	3658.37	1449.08	8.53496	0.597263	0.704449	3240.65	37.9275
Ames28992	AD363-1	No	1.98693	58.961	2.53945	24.4703	3718.37	1502.95	8.75144	0.511361	0.215796	3008.2	39.279
Ames28993	AD363-2	No	1.8219	40.5447	1.70008	18.8493	3425.54	1286.69	6.23049	0.434977	0.179629	2743.63	34.7013
Ames28994	AD188LDS	No	2.24815	46.2409	2.94247	21.1532	4669.92	1403.61	9.08696	0.476398	0.630694	3509.35	38.1158
Ames28995	AD221	No	2.00921	30.5979	3.14907	22.4028	3955.86	1222.16	6.97831	0.498433	0.220585	2884.36	33.7062
Ames28997	AD347DS-2	No	2.02716	49.5019	2.60257	28.8812	3950.05	1485.77	10.2739	0.529463	0.36608	3251.4	34.3854
Ames28998	AD448DS	No	2.26288	33.6806	2.61184	23.3692	3809.51	1255.06	9.02862	0.420617	0.219297	3037.88	37.3523
Ames28999	AD440DS-1	No	2.22437	29.3462	1.95273	26.5054	3600.49	1193.49	6.87165	0.556952	0.219231	2990.45	40.8538
Ames29000	AD440DS-2	No	2.38272	29.3282	2.09336	27.4403	3821.92	1258.59	7.22614	0.482583	0.15089	3046.68	39.5486
Ames29001	ADSA1	No	2.51062	32.3309	1.68081	21.1422	3835.5	1298.12	8.28529	0.53683	0.277482	3096.36	33.8306
Ames29002	ADSA2	No	2.52041	72.1588	2.31079	16.0662	3779.15	1308.08	8.71587	0.426125	0.298292	2900.71	34.632
Ames29003	ADSA3	No	2.27867	40.7692	3.25621	21.1099	3759.23	1300.29	8.10993	0.466738	0.283769	3017.36	35.3587
Ames29004	ADSA4	No	2.64841	75.0132	2.77257	23.0852	4087.67	1347.18	8.1598	0.518471	0.602422	3206.45	37.4079
Ames29005	ADSA5	No	1.74999	53.9651	2.12442	22.0151	3979.7	1304.27	6.28903	0.450632	0.680263	3047.04	29.1513
Ames29006	ADSA6	No	2.70747	43.7629	1.53412	21.1537	3886.23	1178.32	7.02025	0.410917	0.61972	2896.25	29.335
Ames29007	ADSA7	No	2.24474	49.1131	2.25536	23.6776	3778.19	1227.62	7.32247	0.460196	0.679158	2872.6	34.6913
Ames29008	ADSA8	No	2.26901	43.9871	1.83099	22.5643	4003.84	1236.8	6.33992	0.445063	0.426473	2923.57	34.3488
Ames29009	ADSA9	No	2.33882	57.7241	2.55248	22.287	3619.46	1340.01	8.85461	0.41592	0.772139	2901.69	35.4983
Ames29010	ADSA10	No	2.82138	41.2147	1.99877	17.6364	3821.18	1294.54	6.7887	0.410943	0.562083	2909.65	29.8206
Ames29011	ADSA11	No	2.58631	51.6245	2.11783	20.4553	3576.83	1271.44	7.30007	0.428143	0.447512	2637.43	32.2209
Ames29012	ADSA12	No	2.29691	48.1883	2.86741	22.2074	4082.56	1428.56	7.88138	0.473149	0.343504	3468.22	32.554
Ames29013	ADSA13	No	2.35586	42.3301	2.22694	21.8153	4032	1317.67	7.58383	0.42277	0.312697	3079.87	34.0486
Ames29014	ADSA14	No	2.47507	55.6032	2.20156	22.5896	3631.77	1275.77	7.41766	0.476918	0.664357	2923.91	33.7399
Ames29016	ADSA16	No	2.54342	54.8059	2.22625	23.1382	3851.42	1365.17	6.17313	0.568102	0.834739	3042.5	28.8887
Ames29017	ADSA17	No	2.13815	69.772	2.42651	23.1119	3468.41	1184.74	7.42886	0.399547	0.126539	2779.87	28.6994
Ames29018	ADSA18	No	2.18003	41.8367	2.32656	21.5234	3821.22	1290.6	7.36615	0.392254	0.736253	2987.49	30.4818
Ames29019	ADSA19	No	2.21345	38.8378	2.06484	21.1355	4083.27	1388.19	7.01642	0.391937	0.516055	3340.86	31.4827
Ames29020	ADSA20	No	2.1829	40.0129	3.09885	22.3152	4335.15	1414.39	7.80832	0.503749	0.558843	3251.05	34.3235
Ames29021	ADSA21	No	2.01798	30.3964	2.25499	18.0004	3613.11	1161.78	6.65122	0.427389	0.586792	2656.59	31.0619
Ames29022	ADSg1501	No	2.0602	59.4183	3.10979	25.4584	3929.7	1454.79	11.2511	0.496797	0.246778	3304.33	40.4501
Ames29024	ADSg1501-2	No	2.40371	73.5887	3.94884	27.1929	3913.47	1592.23	10.8404	0.475562	0.138653	3503.82	42.3254
Ames29025	ADSg1501-3	No	2.22123	54.2952	3.18507	26.737	4128.07	1529.29	12.4536	0.507717	0.145242	3514.91	41.6863
Ames29026	ADSg1501-4	No	2.04126	57.882	2.79422	25.3556	3714.59	1216.39	11.0427	0.415285	0.157971	2840.79	35.191
Ames29027	ADSg1501-5	No	2.1278	56.0959	3.3609	28.6185	4158.11	1449.32	11.109	0.431253	0.186527	3469.59	38.793
Ames29028	ADSg1501-6	No	2.25389	72.2605	3.45185	25.7786	4217.1	1497.64	13.6746	0.440783	0.213425	3499.58	42.9598
Ames29045	NEI9008	Yes	2.31754	66.6941	1.58397	28.3696	4198.26	1328.39	3.87365	0.407684	0.221469	3248.12	32.0407
Ames29394	1497-2	Yes	1.73906	39.8714	1.61896	23.7128	4654.45	1290.72	6.14575	0.451435	0.188916	3323.48	28.7659
Ames29448	1416-1	Yes	2.22485	48.6992	2.71756	25.4016	4878.82	1378.86	6.46949	0.446601	0.0730598	3501.04	34.8054
Ames29451	GE440	Yes	2.13903	64.341	2.02973	24.7457	3988.28	1339.26	7.06704	0.487079	0.212627	3243.78	34.2112
Ames30529	MR11CubanFlintS6	Yes	2.13566	57.6429	3.19395	23.9194	4310.99	1271.36	5.98369	0.413693	0.100906	3179.27	34.3117
Ames30534	MR20ShoePegS7	No	1.99629	37.5167	2.85283	22.2031	4331.94	1374.79	5.02889	0.487178	0.209338	3010.36	30.9023
Ames30535	MR22TuxpenoS6	Yes	2.48316	37.0881	2.24837	26.437	4737.42	1498.32	5.67369	0.476494	0.10428	3842.27	35.5073
Ames30790	GEMS-0175	Yes	2.08232	28.6146	2.35848	21.4601	4265.01	1330.22	5.45565	0.438961	0.230878	3362.48	31.1078
Ames30791	GEMS-0176	Yes	2.28702	28.4542	2.81223	23.9608	4165.41	1249.96	5.06149	0.423481	0.183448	3117.84	33.3326
Ames30792	GEMN-0177	Yes	2.4564	24.087	1.35754	24.0686	4048.47	1182.42	5.83876	0.480797	0.227117	3042.83	27.8559
Ames30793	GEMN-0178	Yes	2.0503	34.3392	2.30487	22.9057	4414.79	1482.31	6.06033	0.453101	0.296886	3373.02	26.3636
Ames30794	GEMN-0179	No	1.91603	32.9806	1.77724	20.1131	4572.01	1199.27	5.03556	0.589844	0.12356	2942.04	26.9494
Ames30795	GEMS-0180	Yes	1.99081	32.8372	1.61364	19.7414	4013.96	1283.04	6.29624	0.462199	0.191991	3064.86	25.4812
Ames30796	GEMS-0181	Yes	2.21818	34.6276	2.26946	24.9183	4534.31	1385.06	5.52246	0.521483	0.232728	3279.92	30.7451
Ames30797	GEMS-0182	Yes	2.11335	30.3422	1.70561	20.4764	4622.26	1310.61	5.98433	0.477267	0.104953	3420.76	28.9229
Ames30798	GEMS-0183	Yes	2.12446	20.8877	2.09062	17.4401	4217.19	1298.32	4.01352	0.468628	0.0446183	3200.02	25.663
Ames30799	GEMS-0184	Yes	2.44131	35.0142	1.79628	19.2524	4089.95	1345.96	4.31413	0.455333	0.0397853	3086.18	26.148
Ames30855	CML325	Yes	1.98692	50.0689	2.13764	24.8763	3984.64	1257.42	3.66868	0.583632	0.127731	3076.86	29.1655
Ames30856	CML336	Yes	2.42116	54.1588	2.28272	23.6125	4832	1284.68	6.3341	0.508173	0.173172	3432.37	30.216
Ames30857	CML337	Yes	2.32879	71.0971	3.08483	27.2711	4397.74	1171.59	5.43346	0.495677	0.293111	3124.12	32.3294
Ames30859	CML372	Yes	2.68321	58.92	1.61177		5471.31	1597.35	4.3911	0.575832	0.217368	3990.23	42.8956
Ames30861	CML376	Yes	2.29035	43.3501	2.31672	28.1825	4447.9	1276.82	4.46809	0.442805	0.226969	3401.46	32.4359
Ames30862	NC44	Yes	2.19357	30.9893	2.25763	23.7635	4420.4	1388.6	5.40879	0.478185	0.161599	3230.77	34.2187
Ames30863	NC87	Yes	2.36804	75.5723	2.51882	22.5571	4177.57	1301.35	7.92268	0.426854	0.126662	3406.56	30.1527
Ames30864	NC89	Yes	2.04313	36.4106	1.86365	23.3663	4282.35	1257.44	5.9398	0.451581	0.375887	3366.69	31.6299
Ames30865	SC76	Yes	2.25941	60.2215	2.03501	23.5276	4553.04	1281.67	5.49372	0.462996	0.287265	3283.25	29.3313
Ames30866	GEMN-0194	Yes	2.41451	46.5731	1.82442	26.3604	4711.55	1411.36	6.54096	0.465635	0.235888	3702.43	36.6163
Ames30867	GEMN-0195	No	1.79427	35.6118	1.90083	23.7792	4527.86	1383.57	7.86373	0.520462	0.247429	3424.84	31.4282
Ames30868	GEMN-0196	Yes	2.00463	37.4268	1.73008	19.4932	4168.91	1283.63	4.86955	0.488386	0.110312	2969.65	25.5514
Ames30869	GEMN-0197	Yes	2.30219	32.5141	1.62248	25.6196	4559.86	1199.5	4.52246	0.443115	0.300756	3129.92	31.5913
Ames30870	GEMN-0198	Yes	2.01937	29.7279	1.37922	25.4443	4311.48	1312.53	5.21532	0.406362	0.0520682	3260.01	23.7772
Ames30908		No	2.15712	42.4928	1.76252	24.2705	5311.6	1339.97	5.99792	0.678704	0.0980126	3625.9	32.5814
Ames30910		No	2.2698	42.701	2.65838	21.3192	4715.86	1237.77	5.87726	0.567751	0.162675	3377.2	30.0562
Ames30911		No	2.03863	53.1845	1.97511	28.3517	4312.75	1272.76	4.83166	0.387647	0.277136	3170.72	26.8864
Ames30934	3167B	No	2.21387	53.8231	1.66196	19.7958	4257.9	1428.73	8.56153	0.543484	0.556977	3411.75	27.6012
Ames30935	12E	No	2.12341	33.3759	1.63874	20.5363	3608.42	1312.31	6.05849	0.445631	0.178814	2976.56	28.7187
Ames30936	WD456	No	2.31781	19.2696	3.10072	18.8192	4628.99	1314.71	6.27791	0.420897	0.13285	3345.63	31.7133
Ames30940	AH83	Yes	2.01855	47.3886	3.61583	33.1201	4465.45	1733.41	7.99418	0.571206	0.172897	3813.52	47.6244
Ames30941	GEMS-0068	Yes	1.77626	27.9749	1.93804	19.9407	3928.3	1193.31	5.86613	0.437058	0.140343	2982.19	29.8724
Ames30942	GEMS-0069	Yes	1.97318	32.1317	1.67286	26.758	4327.68	1328.42	6.35454	0.398427	0.140386	3397.35	35.5339
Ames30943	GEMN-0070	Yes	2.12238	52.0225	2.79449	28.3735	4677.83	1502.57	7.67435	0.537883	0.26828	3674.85	34.0858
Ames30944	GEMN-0071	Yes	2.28581	27.287	1.58246	30.7152	4749.5	1438.89	5.9094	0.437972	0.122427	3372.9	35.7484
Ames30945	GEMS-0072	Yes	2.12935	31.7758	2.03035	23.4553	4023.77	1261.34	3.01585	0.467065	0.156538	3103.22	30.0972
Ames30946	GEMS-0073	Yes	2.24923	26.8099	1.97521	18.5501	4579.95	1226.7	4.99003	0.394205	0.0621868	3161.53	26.3812
Ames30947	GEMS-0074	Yes	2.10918	51.7379	2.58977	21.0862	4744.72	1329.73	7.3824	0.439911	0.242295	3628.27	27.7523
Ames30948	GEMS-0075	No	2.39127	36.3071	2.04765	24.1606	4299.4	1367.8	6.35795	0.408906	0.22361	3664.85	34.1007
Ames30949	GEMN-0076	Yes	2.22111	36.5168	1.47901	22.8717	4453.91	1262.7	4.60967	0.467787	0.00964365	3015.41	26.3494
Ames30950	GEMN-0077	Yes	2.62229	24.0694	1.68872	23.0107	3748.88	1187.84	3.8262	0.442399	0.209648	2756.86	30.9511
Ames30951	GEMS-0078	Yes	2.19756	42.9349	2.49022	22.6832	4555.49	1428.92	6.62997	0.518036	0.0946027	3533.69	29.0841
Ames30952	GEMS-0079	Yes	1.87166	47.1885	2.40935	20.9976	4822.94	1384.65	7.40957	0.426328	0.253938	3967.22	33.4769
Ames30953	GEMS-0080	Yes	2.09909	33.4164	2.0834	21.126	4686.12	1323.93	5.81037	0.436309	0.498343	3260.71	31.9607
Ames30954	GEMN-0081	Yes	2.02494	42.5218	1.77032	22.6392	3820.61	1269.43	5.14527	0.533117	0.237884	2875.84	30.2345
Ames30955	GEMN-0082	Yes	2.42189	62.1742	2.51508	27.6202	4663.44	1464.95	7.43285	0.572281	0.0916095	3639.33	35.1818
Ames30956	GEMN-0083	Yes	2.25336	43.3861	2.14638	19.1277	4085.94	1074.03	4.57377	0.498018	0.174677	2717.78	25.3577
Ames30957	GEMS-0084	Yes	2.4725	42.8245	2.74599	22.341	4938.87	1369.81	7.1753	0.463139	0.580284	3532.89	29.4539
Ames30958	GEMS-0085	Yes	2.28257	51.3929	2.66475	24.6753	4270.78	1246.1	5.93954	0.579451	0.389169	3299.82	29.8629
Ames30959	GEMS-0086	Yes	2.10424	28.4543	2.12508	20.8628	4865.13	1277.2	4.83453	0.472375	0.182995	3297.68	28.7148
Ames30960	GEMN-0087	Yes	2.34897	33.2116	1.96941	29.4131	4976.25	1332.43	6.58792	0.497961	0.250273	3396.25	34.7566
Ames30961	GEMN-0089	Yes	2.03137	32.7354	2.53971	23.4132	4504.19	1375.89	6.42351	0.553395	0.158253	3419.01	32.705
Ames30962	GEMN-0090	Yes	2.25335	30.9892	3.75803	29.0373	4436.42	1409.25	6.4549	0.604739	0.170226	3665.24	32.4657
Ames30963	GEMN-0094	Yes	2.1128	36.8189	1.70032	26.5935	4063.15	1452.56	5.99154	0.485881	0.286125	3437.52	32.8444
Ames30964	GEMN-0095	Yes	2.41443	45.1178	1.85003	24.6843	4409.18	1606.66	8.52138	0.473537	0.181717	3759.52	35.568
Ames30965	GEMN-0096	Yes	2.41942	33.0651	2.11691	23.5377	4243.66	1455.98	5.85099	0.56123	0.165601	3383.17	32.3344
Ames30966	GEMN-0099	Yes	2.31196	43.8449	1.71529	19.3768	4082.92	1299.66	6.0288	0.445218	0.159549	3123.16	26.1383
Ames30967	GEMS-0185	Yes	2.81274	33.408	2.12767	19.7435	4255.77	1235.19	5.86032	0.579297	0.167575	3143.29	26.1176
Ames30968	GEMN-0186	Yes	2.31813	50.3139	1.7025	17.2563	4680.64	1455.12	6.79988	0.644859	0.00805517	3508.43	29.8163
Ames30969	GEMN-0187	Yes	2.3771	30.6958	2.34956	21.4844	4473.04	1165.48	5.91308	0.56645	0.0832201	3353.96	25.8998
Ames30970	GEMS-0188	Yes	1.94904	33.6243	2.28888	18.2765	4412.47	1330.72	5.5917	0.460155	0.168165	3321.58	26.3264
Ames30971	GEMS-0189	Yes	2.09995	41.6507	2.29636	18.2621	3859.63	1274.79	5.75578	0.457139	0.211654	2884.85	27.3596
Ames30972	GEMN-0190	Yes	2.3875	35.7511	2.08215	20.5306	3928.58	1104.5	5.11594	0.546076	0.0337865	2909.25	29.9444
Ames30973	GEMN-0191	Yes	2.0252	45.2468	2.28671	19.6515	4103.7	1229.24	7.1587	0.47532	0.573929	3021.31	25.1411
Ames30975	GEMN-0193	Yes	1.94756	35.3056	1.80902	18.1523	3934.57	1264.99	3.5627	0.513946	0.22269	2952.45	25.1833
Ames31233	GEMN-0164	Yes	2.11368	35.8859	1.71257	26.7739	4019.12	1158.3	4.95167	0.460084	0.25792	2954.83	31.6064
Ames31234	GEMN-0165	Yes	2.15388	41.3195	2.01585	24.6968	4392.49	1348.27	7.64672	0.522912	0.176954	3332.52	24.0385
Ames31235	GEMN-0166	Yes	1.95313	30.5144	1.76274	27.1406	4643.38	1369.49	8.92409	0.487631	0.261475	3376.57	36.9625
Ames31236	GEMN-0167	No	2.19169	43.2718	1.98092	25.1807	4345.07	1343.74	6.54361	0.548375	0.289069	3269.46	32.143
Ames31237	GEMN-0168	Yes	2.14114	41.571	1.84601	25.4452	4312.1	1445.68	6.29592	0.509169	0.225201	3265.55	35.7726
Ames31238	GEMN-0169	Yes	1.90994	38.6828	1.86861	21.9497	3969.34	1135.3	5.54256	0.387702	0.0790378	2939.31	29.6242
Ames31239	GEMN-0170	Yes	2.23892	37.3504	2.02222	26.4125	4624.91	1441.25	7.86066	0.575467	0.188631	3652.2	35.006
Ames31240	GEMN-0172	Yes	2.14874	40.5724	1.74692	26.9323	4044.89	1277.05	8.83966	0.481648	0.132445	3045.91	32.7667
Ames31241	GEMN-0173	Yes	1.92502	35.3953	1.88898	23.2118	4441.79	1264.78	7.93771	0.510778	0.136995	3195.36	29.7972
Ames31242	GEMN-0207	Yes	2.17156	50.7978	1.75915	21.3922	4851.83	1336.93	4.73174	0.552268	0.222188	2900.63	27.5344
Ames31243	GEMN-0208	Yes	2.21253	43.4344	1.93856	23.602	5103.39	1353.79	5.13805	0.704111	0.199557	3191.63	30.4001
Ames31244	GEMN-0209	Yes	2.00911	49.7543	2.29565	20.0446	4730.93	1250.4	5.25318	0.551609	0.106994	2898.53	24.7399
Ames31245	GEMN-0210	Yes	2.53011	62.1416	1.46945	28.7655	4413.43	1430.34	9.22015	0.500994	0.407587	3213.4	37.4048
Ames31246	GEMN-0212	Yes	2.00964	38.9379	2.08356	23.2657	4443.28	1344.59	8.96224	0.508635	0.30846	3317.13	30.6727
Ames31247	GEMN-0213	Yes	2.04041	30.7301	1.91443	31.1902	4272.11	1307.97	4.55697	0.462637	0.249701	3210.11	35.296
Ames31248	GEMN-0214	Yes	2.22616	64.7948	3.42049	25.2142	4780.55	1437.06	7.37782	0.520333	0.0944046	3503.89	33.3036
Ames31249	GEMS-0215	Yes	2.24606	42.2101	2.37177	21.3412	4175.32	1234.8	4.2778	0.474954	0.124559	3037.78	27.1488
Ames31250	GEMN-0216	Yes	2.49952	46.775	1.8324	25.7991	4870.14	1382.91	7.29247	0.449612	0.439387	3300.4	29.5097
Ames31251	GEMN-0217	Yes	2.13381	45.2934	1.63276	31.2228	4683.94	1425.5	7.61811	0.420736	0.276707	3574.84	36.2169
Ames31252	GA224	Yes	2.06979	30.0273	2.0016	26.9957	4500.08	1259.88	4.06985	0.399704	0.342384	3094.13	28.415
Ames7870		Yes	2.54189	71.1424	3.26047	22.9738	4072.81	1328	7.30887	0.551756	0.249872	3208.93	27.2743
Ames8397	B73HT	Yes	1.84739	18.4881	2.12477	23.0792	4543.88	1229.39	4.76858	0.444123	0.195175	3113.86	29.7073
CIze127	CI127	Yes	1.72693	30.293	1.83224	25.1149	4186.04	1269.13	4.63967	0.458331	0.132305	3085.87	31.0174
CIze21	CI21E	Yes	1.90247	30.269	2.80106	21.1903	3308.82	1328.16	5.55213	0.524172	0.238295	2690.58	30.2147
CIze23	CI23	Yes	2.17704	24.2101	2.14365	26.0009	4258.45	1314.79	5.30926	0.509637	0.129162	3304.71	34.1995
CIze27	CI27	Yes	1.74665	31.3451	1.93317	24.2709	3924.75	1205.28	5.66959	0.475199	0.345103	3081.79	31.147
CIze28	CI28A	Yes	1.95749	23.382	2.52586	22.1147	4038.63	1364.6	7.66387	0.434964	0.0942167	3238.47	29.1286
CIze29	CI29B	Yes	2.41855	29.1909	2.76509	25.7112	5081.58	1501.8	7.29995	0.425602	0.421145	3586.58	35.7924
CIze317	CI317B	Yes	2.26212	51.2392	4.67452	25.7677	4836.18	1509.23	5.30746	0.546983	0.31739	3714.32	37.3903
CIze38	CI38B	Yes	2.22624	73.716	4.25947	29.8875	4766.49	1708.28	8.98243	0.572257	0.294508	3722.18	44.942
CIze40	CI40A	Yes	2.44479	40.4033	2.27797	25.313	4474.78	1444.77	7.17986	0.73195	0.27238	3411.36	33.3779
CIze42	CI42A	Yes	2.07862	46.2712	3.09981	21.4678	4243.23	1282.71	6.3575	0.428168	0.289246	2958.04	28.5939
CIze44		No	1.88785	16.7846	1.61504	30.1583	3916.53	1332.05	5.78079	0.474447	0.078654	3158.02	27.9048
CIze45	CI45	Yes	2.00245	40.2894	3.01834	23.9063	4497.28	1345.55	7.36588	0.797051	0.0832931	3341.69	32.254
CIze49	CI49A	Yes	2.1268	38.6983	2.28251	24.5524	4354.6	1304.73	5.8588	0.48952	0.388826	3396.09	36.3577
CIze64		Yes	2.25645	29.9975	1.71809	20.1924	4154.55	1292.29	7.09342	0.538707	0.384845	3283.02	27.3997
CIze7	CI7	No	2.01579	55.5113	3.38038	24.5128	4093.93	1565.4	10.4985	0.535035	0.371115	3270.07	37.3839
CIze81	CI81B	Yes	2.41789	27.8995	2.23584	21.8228	4301.07	1320.8	5.08099	0.559027	0.0814724	2883.48	31.8409
CIze82	CI82A	Yes	2.46864	41.27	3.35014	24.6612	3938.8	1355.88	6.16849	0.448406	0.167202	2975.32	30.7901
CIze83	CI83A	Yes	2.56954	28.3628	4.77476	22.4243	5202.41	1426.63	7.12821	0.6019	0.210516	3456.49	37.6963
CIze85	CI85B	Yes	2.366	30.4816	2.15252	21.5025	4741.25	1283.27	3.79013	0.630241	0.310076	3280.66	28.4908
CIze86	CI86B	Yes	2.62617	27.6095	2.09422	23.8165	4286.11	1315.84	4.28461	0.411391	0.11277	3167.35	27.5687
CIze88	CI88A	No	2.38872	41.8155	2.75747	27.5354	4249.73	1287.5	8.08028	0.475623	0.406126	3285.61	37.2821
CIze89	CI89B	Yes	1.84478	47.6571	1.60929	22.8067	4838.02	1535.62	7.36999	0.681381	0.191027	3799.71	28.4653
CIze90	CI90A	Yes	1.94158	76.4394	2.01513	27.2541	3325.38	1393.17	6.59891	0.716249	0.125166	2905.08	30.2623
CIze91	CI91B	Yes	2.19256	34.9961	3.17701	27.5714	4181.35	1449.86	6.63351	0.490648	0.164588	3254.04	35.6392
NSL117226	R802A	Yes	2.30026	40.4198	2.68248	19.4758	4080.89	1548.02	8.22251	0.621369	0.541528	3517.56	28.321
NSL15405	5261	No	1.94781	56.2066	4.05673	25.1777	4213.93	1346.81	6.4773	0.532054	0.118525	3153.11	32.0114
NSL174429	INB101LFY/LFYA632XM16S5	Yes	2.36757	32.1743	2.0212	17.1091	4986.58	1407.97	6.27488	0.473881	0.164254	3711.86	26.1199
NSL197104	H116	Yes	2.16004	22.6815	2.72771	22.3353	4447.23	1293.11	4.8964	0.393156	0.305656	3320.19	32.8327
NSL197105	H117	Yes	2.4742	50.365	1.5298	20.0584	4482.11	1310.29	5.54425	0.478488	0.183832	3270.48	22.5866
NSL197106	H118w	Yes	2.02832	54.0453	2.53082	21.6994	5028.52	1285.31	7.65464	0.48513	0.337543	3220.04	31.308
NSL22628	K47	Yes	2.30421	54.366	3.09968	25.2535	3805.77	1290.61	5.90843	0.454462	0.11036	2877.69	38.0744
NSL22629		Yes	1.82682	43.5563	1.68553	20.3258	4490.62	1351.95	5.80056	0.492028	0.633715	3257.11	25.3451
NSL22630	K150	Yes	2.2091	38.0187	2.38456	22.9114	4234.61	1232.11	5.55534	0.501563	0.364972	3252.15	29.8371
NSL22631	K11	Yes	2.46084	35.3739	2.56476	24.5223	4606.24	1314.8	5.25097	0.635273	0.191751	3519.58	36.582
NSL22632	K201	Yes	2.15094	31.7917	1.43787	20.5308	4068.04	1661.61	7.82745	0.499092	0.0916168	3771.95	30.0315
NSL22633	KYS	Yes	1.99199	59.6104	1.98973	27.9652	4357.72	1483.18	10.9655	0.403648	0.348705	3626.03	36.6727
NSL22634	K155	Yes	2.37397	44.5356	2.8132	22.5202	4803.79	1152.61	6.70656	0.61084	0.146458	3414.08	30.7264
NSL22635	K41	Yes	2.20073	60.0726	1.74278	26.2149	3930.16	1475.72	6.11021	0.45685	0.0928449	3357.04	33.7226
NSL22893	F44	Yes	2.44309	81.2772	2.97289	20.2165	3794.79	1205.12	5.83024	0.583777	0.0796409	2829.62	23.2395
NSL22894		No	2.20455	62.6294	3.17078	24.3379	3686.06	1364.95	6.2115	0.46546	0.207759	3058.17	35.5854
NSL22983	C102	Yes	2.15857	59.3225	3.18653	17.4566	4800.02	1345.37	6.88431	0.465166	0.491032	3589.71	33.602
NSL22984	J47	Yes	2.18624	38.333	2.9112	27.8727	4193.19	1416.54	10.2292	0.456179	0.197493	3387.33	33.5784
NSL242483	R105	Yes	2.09	47.2192	2.34454	29.1692	4992.24	1557.56	7.64889	0.616209	0.482799	3815.54	48.4666
NSL242484	R109B	No	2.17013	60.6429	2.81894	23.7904	4919.22	1310.94	3.96663	0.409558	0.327352	3480.23	32.786
NSL243016	792	Yes	1.94859	30.6309	1.68367	19.5176	4325.94	1240.35	3.52807	0.429565	0.577332	3221.76	29.4445
NSL246154		No	1.93986	40.6426	1.71618	23.4187	4079.33	1272.32	3.8529	0.478462	0.179652	3111.13	28.9588
NSL28965	OH33	Yes	2.2847	29.2979	2.35913	25.2013	4138.57	1412.02	4.18418	0.561766	0.265126	3244.77	31.1109
NSL28966	Oh40B	Yes	2.61839	44.3754	3.91387	26.1778	5231.98	1446.13	7.12587	0.786039	0.0967409	3712.94	37.5163
NSL28967	Oh56A	Yes	2.32133	43.0533	2.65904	21.246	4244.83	1372.21	6.64445	0.418476	0.321614	3252.18	26.4113
NSL28968	OH84	Yes	2.05505	46.0009	2.79866	22.0373	4838.82	1419.32	5.47945	0.577813	0.124982	3057.3	30.7072
NSL29284	R902A	Yes	1.9743	55.3258	1.93664	21.647	4365.75	1254.44	6.32131	0.470549	0.15026	3126.58	31.2284
NSL29285	R903B	Yes	2.19347	43.2637	2.51485	22.6572	4825.07	1206.4	5.94502	0.57428	0.180319	3243.77	30.754
NSL29287	R941	Yes	2.13525	24.602	1.52755	21.6616	4100.18	1306.96	3.55334	0.471861	0.163437	3085.08	25.1375
NSL29303	R216	Yes	2.69674	55.8682	1.78301	22.6129	4378.13	1335.6	4.47928	0.617124	0.271231	3383.67	29.7468
NSL29304	R216A	Yes	2.15933	66.8455	2.01224	24.2188	4277.27	1409.05	6.06837	0.620045	0.365359	3540.18	31.3038
NSL29305	R218	Yes	1.98672	36.2483	2.59284	23.964	3988.87	1265.72	6.2324	0.533967	0.639122	2684.2	34.2129
NSL29314	R219	Yes	2.67481	45.5773	2.31119	27.1544	4609.3	1550.66	9.02639	0.545748	0.549535	3484.73	40.2226
NSL29316	R220	Yes	2.21593	28.1569	2.11718	23.3412	4231.52	1335.45	8.22792	0.480673	0.147842	3288.52	30.5514
NSL29317	R221	No	2.32223	44.4224	2.35702	25.0256	4571.03	1451.49	6.38712	0.51401	0.278501	3461.45	31.171
NSL29319	R222	Yes	2.25047	41.9498	3.06111	27.3013	4197.77	1414.32	6.82764	0.413452	0.164581	3424.39	28.469
NSL29898	R222A	Yes	2.0377	45.3018	2.39263	27.3826	3801.96	1263.01	8.32281	0.456047	0.247704	3102.75	24.9232
NSL30038	K4	Yes	2.19059	20.5492	1.47071	24.1927	4386.72	1538.51	6.87061	0.505725	0.20675	3499.43	33.8527
NSL30046	B41	Yes	2.23149	31.1691	1.94934	23.698	4458.72	1249.76	4.40552	0.430514	0.176815	3070.51	31.1069
NSL30055	W374R2	Yes	1.81912	31.0168	2.49433	23.3249	4808.46	1308.24	6.29152	0.534606	0.283175	3120.03	38.3662
NSL30056	W703	Yes	2.36022	26.4384	2.99677	25.4955	5155.96	1308.52	6.18685	0.596387	0.187933	3542.28	33.3365
NSL30058		Yes	2.60415	35.659	2.55174	23.7748	4770.53	1301.08	7.2333	0.304919	0.33884	3416.89	23.8172
NSL30059		Yes	2.07973	45.5054	2.74642	27.6458	4225.14	1309.76	5.82263	0.534676	0.245305	3058.56	38.2392
NSL30060	W23	Yes	2.20246	46.4676	2.00848	26.2109	3779.4	1296.36	8.49427	0.459899	0.335104	3119.12	33.4011
NSL30062		Yes	1.83517	51.1365	3.50075	22.2983	4460.3	1380.99	7.6905	0.391409	0.538038	3520.2	35.6605
NSL30063	W182D	Yes	2.0629	27.0697	3.06355	23.1068	4671.13	1256.16	7.6883	0.487422	0.445915	3313.91	30.9334
NSL30064	W24	Yes	2.06509	48.0966	2.40587	23.3959	4413.02	1380.55	7.04598	0.431992	0.292553	3572.97	30.184
NSL30065	W9	Yes	2.40929	51.3833	1.83414	25.1034	4650.58	1601.91	6.5854	0.53055	0.326212	3989.54	31.9102
NSL30066	WR3	Yes	2.10781	40.2508	1.78556	20.9017	4236.31	1322.25	5.33673	0.533683	0.0724997	3243	29.9707
NSL30067	W22R	Yes	1.80632	49.1717	2.29596	21.3719	4625.92	1405.48	8.28384	0.490183	0.55774	3436.83	26.7014
NSL30068	W374B	Yes	2.0298	72.7721	2.44736	24.8138	4845.01	1484.38	11.5398	0.469917	0.198675	3872.98	37.4932
NSL30070	WM13R	Yes	2.40702	34.2009	1.99867	26.1115	5911.4	1518.89	8.62321	0.693619	0.119777	3643.39	31.4002
NSL30071	W32	Yes	2.21252	56.1257	2.33375	24.2922	4463.22	1376.82	6.5008	0.725219	0.259486	3584.56	29.8616
NSL30073	W37A	Yes	1.87773	34.0884	2.34066	21.2967	3865.97	1360.19	8.17933	0.446312	0.402887	3383.87	34.3981
NSL30074	W182E	Yes	1.93062	30.709	3.21577	23.6049	4834.99	1242.72	5.14175	0.464299	0.120517	3290.4	22.4594
NSL30835	SD10	Yes	2.28642	39.1413	1.4934	22.6874	4381.51	1416.46	5.32592	0.432597	0.597319	3362.89	26.949
NSL30861	A	Yes	2.12817	39.023	1.8683	20.338	4698.06	1512.73	5.67345	0.405534	0.242158	3828.9	28.5159
NSL30863	L	Yes	1.85962	44.7172	1.14941	24.4363	3910.22	1419.51	7.21891	0.471184	0.492476	3320.94	29.9661
NSL30864	HY2	Yes	2.00534	57.0833	2.05871	22.5791	4060.59	1346.56	5.56516	0.384803	0.0588317	3238.85	32.717
NSL30865	R2	Yes	2.40121	42.8372	1.28817	26.2247	4551.36	1549.65	7.18571	0.39054	0.402432	3814.99	30.7434
NSL30866	R004	Yes	2.297	37.8807	2.65421	21.8021	4920.36	1335.86	7.04604	0.590457	0.200479	3199.25	29.9868
NSL30867	M14	Yes	2.22758	63.0918	2.0127	26.2919	4217.99	1338.72	5.72985	0.542034	0.366144	3301.25	31.6274
NSL30868	R30	Yes	2.12293	36.1478	2.52329	19.7868	4591.04	1324.36	5.35171	0.52802	0.358285	3343.45	31.2118
NSL30869	R53	Yes	2.18685	38.5304	2.15467	18.189	4486.29	1295.68	5.12476	0.480798	0.129347	3427.99	32.7993
NSL30871	R061	Yes	2.38701	38.4786	1.86749	24.8919	4569.5	1402.15	6.09106	0.447893	0.191578	3432.47	31.1484
NSL30872	R71	Yes	2.47464	37.9544	1.97169	27.7023	4599.21	1519.6	6.0945	0.607234	0.353265	3760.67	34.1123
NSL30874	R75	Yes	2.47127	25.9804	1.7204	26.1929	4835.14	1409.2	6.21068	0.402563	0.286029	3773.26	33.4747
NSL30875	R76	Yes	2.09339	55.8195	5.74591	23.5482	4267.33	1456.16	8.27548	0.449055	0.699618	3285.57	39.2887
NSL30876	R78	Yes	2.21854	39.7799	2.72178	25.4257	5080.34	1441.98	5.52677	0.5609	0.098372	3277.93	30.9822
NSL30877	R84	Yes	1.73795	34.6037	2.00264	26.0139	4764.06	1495.35	6.3043	0.479247	0.200844	3419.36	27.1395
NSL30878	R101	Yes	2.52917	62.532	2.91443	23.4858	4042.37	1266.99	7.53916	0.561254	0.063706	2969.59	29.7377
NSL30879	R103	Yes	2.0765	64.2255	2.44081	22.8774	4166.91	1327.97	7.43158	0.499246	0.0530638	3076.08	31.8459
NSL30880		Yes	1.88471	42.9178	2.01751	25.1211	4469.67	1306.66	6.5759	0.459961	0.417853	3103.68	41.14
NSL30883	R113	Yes	1.78292	24.1807	2.09913	26.0475	5679.72	1421.16	5.51758	0.60579	0.628042	3556.46	35.0138
NSL30884	R134	Yes	2.11615	60.8161	2.93199	24.602	4611.96	1299.63	5.50124	0.44273	0.783317	3388.12	32.5927
NSL30885	R138	Yes	2.21462	48.4938	1.72849	24.28	3256.59	1309.9	6.1494	0.40068	0.114335	3031.73	30.6111
NSL30888	R154	Yes	1.91654	36.5259	2.58832	22.9661	3853.11	1177.87	5.44363	0.538522	0.136691	2900.88	31.4663
NSL30890	R159	Yes	1.92795	22.8681	2.37989	18.7963	4637.32	1191.55	4.46757	0.667547	0.505954	3326.16	29.3575
NSL30891		Yes	2.51285	32.8697	2.45316	25.5098	4602.34	1357.58	5.4864	0.52912	0.434235	3544.21	33.4157
NSL30894	R177	Yes	2.32264	44.6446	3.40938	27.6264	5218	1356.38	7.15235	0.658987	0.397137	3759.94	35.4512
NSL30895	R181	Yes	2.15571	33.6114	2.92416	25.8114	4497.74	1309.51	5.54488	0.529458	0.249298	3502.17	31.5561
NSL30896	R181B	Yes	2.22572	50.0024	2.9859	23.6138	4648.41	1285.72	6.18022	0.495167	0.365891	3513.09	30.3812
NSL30898	R192	Yes	2.12149	69.5132	2.02085	23.7063	4820.5	1260.32	5.70077	0.539505	0.190672	3535.76	29.7196
NSL30901	R196	Yes	2.29012	41.7137	2.23249	26.6923	4425.67	1375.84	5.61686	0.438283	0.147901	3518.13	32.2694
NSL30902	R197	Yes	2.07316	59.6625	3.18721	21.2313	4682.92	1382.1	5.91449	0.487067	0.543787	3212.33	30.4738
NSL30903	90	Yes	1.69917	40.2355	3.02715	23.0013	4818.85	1389.86	8.57772	0.426628	0.158668	3764.94	26.9106
NSL30904	4226	Yes	2.13137	48.5741	3.64867	23.6088	4120.72	1392.27	10.5691	0.406838	0.22	3494.21	40.1037
NSL30905	5120B	Yes	2.30243	52.9566	1.98023	21.8501	4186.77	1617.82	7.56476	0.499438	0.102709	3498.09	28.1113
NSL30906	R904A	Yes	2.3486	39.3757	1.91805	20.5354	4124.26	1302.3	8.19892	0.453646	0.159903	3088.38	30.6598
NSL30907	R906	Yes	2.05992	70.1695	2.60648	22.007	4402.83	1222.21	5.12538	0.571273	0.468477	3071.14	32.4405
NSL30908	R907	Yes	2.23664	34.048	1.85158	21.5621	4320.35	1349.58	5.20556	0.486443	0.100867	3143.65	28.7183
NSL30909	R909	Yes	2.25208	38.7243	2.0004	25.276	5073	1313.7	5.90934	0.437122	0.28181	3345.35	31.4135
NSL30910	R914	Yes	2.19659	80.6526	2.33291	24.4284	3773.53	1364.64	6.3519	0.497073	0.143056	3299.58	31.2137
NSL30912	R921E	Yes	2.18532	25.5973	2.74288	25.9649	4105.68	1403.41	5.84077	0.500553	0.131899	3147.77	28.1923
NSL30913	R924	Yes	2.32407	17.6478	2.00724	21.7776	4872.47	1362.24	5.63667	0.402344	0.280598	3682.16	28.213
NSL32720	ND33	Yes	1.96315	50.9583	2.37891	23.7963	4572.8	1417.43	8.43364	0.571656	0.304278	3433.55	37.1144
NSL32723	ND1	Yes	2.02514	58.4834	2.75881	22.6405	4285.58	1423.96	7.85508	0.369055	0.190837	3372.58	27.8894
NSL32726	ND167	Yes	2.11327	66.3146	1.8876	24.3428	4271.42	1457.93	5.94064	0.68503	0.186081	3471.62	21.3239
NSL32727	ND-B8	Yes	2.2132	41.5691	2.09091	23.8136	4329.34	1345.05	7.26177	0.494496	0.273884	3241.12	32.4563
NSL32728	ND230	Yes	2.26767	36.8419	2.93516	25.5714	4999.75	1471.76	7.67203	0.489344	0.093236	3649.74	30.2931
NSL32729	ND468	Yes	2.57857	61.4483	3.85863	25.4457	4573.93	1256.81	4.54572	0.354731	0.206069	3292.58	35.7754
NSL32730	ND405	Yes	2.18971	40.4987	2.96281	22.5497	4670.97	1309.01	4.97337	0.461377	0.444384	3456.89	32.641
NSL32731	ND385	Yes	1.86663	46.3084	2.24443	22.2111	4157.65	1354.31	6.44052	0.468885	0.301677	3210.08	31.3482
NSL32732	ND203	Yes	2.57167	43.6744	2.6341	26.9002	4575.08	1425.79	7.91141	0.432986	0.454781	3246.25	34.6501
NSL32733	ND376	Yes	2.1301	43.972	1.64651	25.4764	4577.32	1399.3	7.39248	0.61128	0.390643	3555.5	34.991
NSL32734	ND408	Yes	1.7879	25.4729	2.90133	22.4479	4641.98	1144.04	3.50011	0.475107	0.230246	3416.79	27.9559
NSL32735	ND407	Yes	2.14394	34.588	3.84947	25.7148	4775.72	1352.75	5.54445	0.425778	0.296516	3445.37	30.2182
NSL32736	ND480	Yes	1.84334	32.8782	3.82519	22.1861	5010.05	1275.39	4.86314	0.443758	0.236723	3604.92	29.6929
NSL32738	ND283	Yes	2.15428	32.0328	1.82612	20.0016	4033.11	1354.14	7.49133	0.452531	0.188689	3104.25	35.6438
NSL32739	ND474	Yes	2.23889	23.1332	1.74072	20.9363	4055.79	1222.67	5.8016	0.463003	0.262403	3093.21	29.8205
NSL34374	SD15	Yes	1.90772	52.3201	1.85982	18.8734	3994.57	1192.57	3.10124	0.533986	0.461624	3074.99	21.5038
NSL42804	R223	Yes	2.14031	47.6524	2.39257	25.2116	4114.77	1410.96	5.7356	0.567408	0.301509	3431.51	32.839
NSL42806	R839	No	2.67152	73.4745	2.64838	33.7908	8437.32	1694.68	8.58277	0.700963	0.150543	3980.09	38.4761
NSL42807	R851	No	2.99125	60.4756	3.87333	33.054	6187.47	1936.92	9.62875	0.759525	0.25295	4741.45	44.4107
NSL42808	R853	No	2.25129	50.025	5.26161	27.155	4454.3	1731.64	11.0073	0.59323	0.278058	4534.72	38.0183
NSL42872	A7	Yes	2.10735	38.9272	2.74495	22.447	5285.6	1369.13	6.97062	0.462377	0.328367	3692.08	33.1049
NSL42873	A12	Yes	2.29395	46.6563	3.50532	32.0399	5212.28	1561.44	7.79718	0.404799	0.327681	3639.6	33.2887
NSL42875	A71	Yes	2.1258	38.2675	1.88429	17.7959	3530.18	1344.36	6.71335	0.460279	0.282868	2871.11	30.8601
NSL42877	A165	Yes	2.31099	47.0668	3.15907	22.3389	4983.48	1475.55	9.22991	0.561559	0.64173	3443.33	34.5341
NSL42878	A171	Yes	2.21897	41.7415	1.80505	24.3865	4058.06	1236.94	4.33881	0.516583	0.578258	3252.59	32.6864
NSL43597	Tx441	Yes	2.20007	29.9056	2.57074	23.4413	4003.51	1336.45	5.33365	0.546055	0.151417	3003.96	35.4997
NSL437871	AusTRCF305795	Yes	2.21164	31.4641	1.94444	25.6476	4047.33	1318.95	6.25673	0.399607	0.306814	3260.7	31.1321
NSL437877	AusTRCF305801	Yes	1.92907	82.1875	1.55312	24.3236	4921.07	1405.26	6.28753	0.473304	0.283228	3266.33	27.8129
NSL437878	AusTRCF305802	Yes	1.5852	81.0601	1.64448	25.7925	4621.34	1352.2	8.75018	0.447367	0.284993	3164.42	25.797
NSL437879	AusTRCF305803	Yes	2.26327	62.0801	3.13345	25.8707	4082.12	1576.08	7.07305	0.435051	0.371431	3344.91	37.0386
NSL437884	AusTRCF305808	Yes	2.23679	29.4699	1.3735	24.4156	4687.89	1312.17	5.3829	0.41714	0.200816	3131.47	31.9481
NSL437890	AusTRCF305816	Yes	2.79613	43.9889	1.48395	20.4395	4106.24	1388.75	3.67424	0.439273	0.0984336	3319.17	21.5099
NSL437891	AusTRCF305817	Yes	2.43844	33.7462	2.9018	26.0013	4729.97	1400.26	5.88207	0.488913	0.0828614	3547.34	31.2875
NSL437893	AusTRCF305819	Yes	1.92162	30.2773	2.6454	24.4992	3802.65	1311.71	7.09998	0.451431	0.16251	3161.24	36.176
NSL437895	AusTRCF305821	Yes	2.05563	34.3453	1.4019	18.0079	4138.41	1221.61	7.40593	0.376929	0.331465	2719.59	24.6709
NSL437896	AusTRCF305822	Yes	2.07805	47.0101	2.11025	21.0668	4131.86	1314.03	5.93242	0.373408	0.238614	2897.22	26.7103
NSL437897	AusTRCF305823	Yes	2.2971	47.3234	2.02894	25.2359	3958.5	1197.3	4.7807	0.431884	0.127596	3002.06	25.099
NSL437899	AusTRCF305825	Yes	2.23547	37.1995	2.43204	23.1755	4317.15	1226.5	4.80038	0.426209	0.169381	3235.02	32.187
NSL437903	AusTRCF305829	Yes	2.33633	29.5348	3.1051	24.3171	4673.5	1292.68	6.70529	0.567192	0.22658	3322.53	29.414
NSL437905	AusTRCF305831	Yes	2.0321	31.0192	3.06719	25.5059	4666.6	1175.76	4.0937	0.446387	0.296407	2864.32	34.2478
NSL437907	AusTRCF305833	Yes	2.22137	35.2671	1.82975	25.6592	4178.27	1105.06	3.94456	0.449527	0.146512	3009.26	29.1924
NSL437908	AusTRCF305834	Yes	2.14038	35.2891	1.42791	19.9777	4361.35	1248.43	4.90548	0.474675	0.123976	2794.45	25.7427
NSL437909	AusTRCF305835	Yes	1.92706	32.9156	2.87444	25.2963	4660.49	1176.96	4.25687	0.419133	0.260014	2940.43	33.3294
NSL437910	AusTRCF305836	Yes	2.14892	35.1993	2.18313	26.6008	4502.07	1213.5	3.67012	0.415301	0.406228	3239.5	34.6985
NSL437913	AusTRCF305839	Yes	2.16627	38.325	2.33292	24.254	4859.53	1177.59	4.60995	0.470133	0.203978	3002.63	32.7171
NSL437914	AusTRCF305840	Yes	1.83057	31.3357	2.14064	24.5651	4623.77	1191.49	4.49499	0.398895	0.200992	2918.78	32.1399
NSL437915	AusTRCF305841	Yes	2.72239	39.0323	3.06258	25.0211	4626.21	1175	6.52451	0.514109	0.194733	3019.39	30.2687
NSL437920	AusTRCF305846	Yes	2.46363	26.0419	2.65075	24.7614	4433.48	1153.65	5.03835	0.524698	0.0685627	3068.99	27.9082
NSL437923	AusTRCF305849	Yes	2.57836	19.2345	2.10412	22.3966	5291.98	1184.15	5.46636	0.521826	0.0549066	3163.2	29.205
NSL437925	AusTRCF306065	Yes	2.47407	32.8519	2.71919	25.5022	4797.07	1315.67	6.29501	0.522939	0.220139	3364.25	31.308
NSL437927		No	2.42803	23.099	2.11772	26.1371	4298.18	1317.95	5.20314	0.487659	0.162151	3431.05	27.6414
NSL437928	AusTRCF306068	Yes	2.34795	43.4923	1.35183	22.7786	5509.95	1271.96	4.15933	0.423255	0.328245	3461.71	29.1525
NSL437929	AusTRCF306234	Yes	2.28913	31.093	1.32988	23.5917	4710.6	1422.5	5.34052	0.487873	0.087302	3384.38	26.5481
NSL437930	AusTRCF306235	Yes	2.2865	42.1499	2.6013	29.0202	4752.69	1354.79	6.05942	0.520976	0.18675	3277.29	37.0118
NSL437931	AusTRCF306236	Yes	2.01615	35.2799	2.53658	20.4191	5163.31	1313.82	5.15017	0.543059	0.165233	3358.69	28.7142
NSL437932	AusTRCF306237	Yes	2.14289	46.622	3.61702	20.2106	4897.7	1432.84	6.81178	0.453803	0.191153	3381.07	28.7175
NSL437933	AusTRCF306238	Yes	2.13688	24.0392	2.37063	25.9322	5113.96	1588.73	5.86643	0.729429	0.170553	3717.61	31.4472
NSL437934	AusTRCF306239	Yes	1.98081	29.02	3.97445	24.2015	5527.19	1332.32	8.43177	0.515409	0.130551	3684.21	31.4918
NSL437935	AusTRCF306240	Yes	2.25111	22.5696	1.85065	22.5862	4636.92	1385.6	6.66175	0.467374	0.0871611	3178.52	27.5426
NSL437936	AusTRCF306241	Yes	2.23032	27.4771	2.17313	18.2082	4487.68	1304.43	5.30977	0.596889	0.185468	3154.1	25.9463
NSL437937	AusTRCF306242	Yes	2.53417	49.858	2.25752	20.6776	4784.02	1362.36	7.06277	0.561469	0.39893	3773.13	35.948
NSL437939	AusTRCF306244	Yes	2.17223	43.4804	2.49587	17.9339	4226.75	1185	4.88163	0.434081	0.163363	2708.67	24.1107
NSL437940	AusTRCF306245	Yes	2.35619	42.7137	2.72261	21.688	4323.18	1122.61	5.26865	0.677998	0.169676	2791.76	31.791
NSL437943	AusTRCF306254	Yes	2.24452	36.5463	1.56686	23.217	4322.87	1306.98	5.27183	0.362714	0.25272	3027.97	28.2874
NSL437946	AusTRCF306257	Yes	2.11038	38.0253	2.09638	19.8334	4273.62	1320.33	6.06767	0.512646	0.237454	3379.95	27.2806
NSL437947	AusTRCF306258	Yes	1.87324	51.8445	1.52227	17.0583	4350.83	1190.89	5.23052	0.518418	0.137246	3079.9	22.7197
NSL437948	AusTRCF306259	Yes	2.18882	56.1916	1.81151	23.3932	4066.16	1399.69	5.29947	0.422114	0.215375	3060.19	34.3045
NSL437952	AusTRCF306264	Yes	2.20518	31.6345	3.06419	25.8479	4542.17	1308.63	4.96907	0.402008	0.201593	3232.42	30.6605
NSL437959	AusTRCF306273	Yes	2.14319	29.2297	2.96655	25.2583	4134.84	1229.18	5.47848	0.476527	0.228425	3163.57	34.4318
NSL437960	AusTRCF306274	Yes	2.1003	40.8447	3.3089	28.1257	4223.68	1344.7	6.83071	0.451149	0.305434	3284.28	40.0615
NSL437962	AusTRCF306276	Yes	2.03106	23.9931	2.8205	23.693	4250.96	1208.39	4.56731	0.429714	0.156886	3135.41	26.5216
NSL437964	AusTRCF306278	Yes	2.18968	36.4264	2.30679	20.3939	4302.46	1164.63	4.55581	0.436555	0.292825	3135.67	26.0848
NSL437966	AusTRCF306280	Yes	2.3022	22.5526	2.21418	23.663	4394.75	1176.33	5.41554	0.455174	0.14062	2947.46	26.5369
NSL437968	AusTRCF306282	Yes	2.26595	28.3253	2.9978	29.2592	4375.38	1215.33	5.76641	0.453321	0.231335	3147.77	30.8327
NSL437971	AusTRCF306285	Yes	2.41596	27.3209	2.30671	24.8319	4393.75	1260.18	6.24669	0.438929	0.254269	3202.99	36.2058
NSL437973	AusTRCF306287	Yes	2.38295	14.8222	2.54464	23.5788	4725.27	1169.34	4.58488	0.42666	0.0523939	3074.61	26.9386
NSL437976	AusTRCF306290	Yes	2.33602	38.8509	2.48942	23.945	4277.17	1214.38	6.47668	0.441601	0.0789271	3096.03	28.3808
NSL437979	AusTRCF306293	Yes	2.23573	59.53	2.83522	27.1393	4181.22	1234.16	5.72989	0.427321	0.264938	3122.5	26.8753
NSL437980	AusTRCF306294	Yes	2.2844	47.1401	2.46824	22.7561	4420.51	1201.32	5.67989	0.444214	0.188531	2990.8	23.8819
NSL437981	AusTRCF306295	Yes	2.24183	49.7698	2.81959	27.5094	4380.14	1243.32	7.56545	0.484625	0.140513	3077.72	31.1847
NSL437982	AusTRCF306296	Yes	2.22913	56.7565	3.04472	27.0377	4250.96	1254.14	6.59488	0.480378	0.174666	3084.82	28.2059
NSL437987	AusTRCF306301	Yes	2.1501	33.7742	1.80318	23.8611	4269.7	1234.26	6.45139	0.448079	0.202262	3163.57	28.7349
NSL437988	AusTRCF306302	Yes	1.92034	14.3283	2.1196	19.7378	4525.85	1211.68	4.08308	0.382043	0.331436	3107.99	29.4516
NSL437989	AusTRCF306303	Yes	2.46182	33.1348	2.2866	21.2529	4611.51	1302.87	5.24552	0.391221	0.443083	3382.99	31.839
NSL437990	AusTRCF306304	Yes	2.1791	30.003	2.26419	20.3605	4889.37	1302.19	5.25956	0.428651	0.399876	3293.6	33.1922
NSL437992	AusTRCF306306	Yes	2.08801	26.5261	1.87726	18.9404	4499.28	1169.96	3.89426	0.475247	0.272454	3013.85	28.0733
NSL437993	AusTRCF306307	Yes	2.08912	31.9947	1.95096	21.4139	5094.47	1277.12	4.8167	0.387619	0.157222	3180.05	30.9996
NSL437994	AusTRCF306308	Yes	2.28979	35.6752	2.73401	21.1123	4698.69	1240.01	4.19037	0.436206	0.103317	3147.15	29.4745
NSL437995	AusTRCF306309	Yes	2.06269	26.9938	2.27963	21.1541	4654.75	1287.25	4.4405	0.40849	0.204554	3220.3	29.4565
NSL437996	AusTRCF306310	Yes	2.29993	35.6167	1.8727	23.5726	4516.89	1338.69	4.74196	0.424045	0.0990621	3256.06	29.7839
NSL437998	AusTRCF306312	Yes	2.15941	28.7843	1.48368	19.4949	4451.8	1443.69	8.46137	0.458053	0.553585	2981.28	26.9595
NSL438002	AusTRCF306316	Yes	2.2407	35.9724	1.94414	22.9651	4213.28	1378.41	6.15329	0.432972	0.683624	3139.53	28.1024
NSL438005	AusTRCF306319	Yes	2.4948	32.6891	2.26346	22.8338	4488.5	1395.63	6.694	0.375214	0.201708	3300.06	24.8762
NSL438007	AusTRCF306321	Yes	2.20107	34.3303	2.30246	22.1722	4487.94	1496.15	8.5163	0.449844	0.600385	3597.92	31.2235
NSL438008	AusTRCF306322	Yes	2.48091	38.6074	1.98727	23.4954	4142.13	1310.12	7.67982	0.428658		3163.83	35.0516
NSL438009	AusTRCF306323	Yes	2.21767	47.9059	2.36614	20.6954	4337.12	1335.93	6.70519	0.474233	0.508998	3214.16	31.873
NSL438010	AusTRCF306324	Yes	2.16519	43.8086	2.10031	19.5858	4363.45	1303.29	5.13105	0.497478	0.344757	3045	27.922
NSL438013	AusTRCF306327	Yes	2.39724	53.6059	1.81455	24.4613	4863.36	1390.04	7.1201	0.436548	0.373887	3662.09	31.9733
NSL438019	AusTRCF306333	Yes	2.52019	52.1226	3.86698	27.5797	4201.36	1149.81	3.88889	0.405956	0.164056	2967.12	31.842
NSL438021	AusTRCF306335	Yes	2.32339	33.0706	3.04553	24.191	4569.5	1304.42	7.85272	0.316876	0.339343	3331.68	28.0106
NSL438022	AusTRCF306336	Yes	2.59204	45.6177	2.76939	24.388	4341.12	1292.28	6.70482	0.368684	0.319927	3245.46	29.9559
NSL438030	AusTRCF306344	Yes	2.28995	25.2346	1.68667	21.9232	4915.35	1305.49	6.43379	0.371798	0.240437	3170.86	32.7653
NSL438031	AusTRCF306345	Yes	2.0859	24.0939	2.64804	25.5396	4448.42	1220.08	6.11481	0.528015	0.539134	3122.58	33.6418
NSL438032	AusTRCF306346	Yes	2.17184	52.2745	2.30395	26.0943	4357.92	1202.21	5.57858	0.467887	0.52654	2920.36	32.5713
NSL438033	AusTRCF306347	Yes	2.41081	31.3073	2.08777	23.0649	4788.11	1386.7	4.48421	0.415519	0.458621	3333.22	28.9367
NSL438034	AusTRCF306348	Yes	1.98542	36.2263	2.05917	21.1554	4818.3	1330.35	4.97058	0.385232	0.220881	3309.63	29.2557
NSL438036	AusTRCF306350	Yes	2.28904	31.6903	1.88898	19.9882	4720.63	1249.41	5.47109	0.476112	0.284509	3173.09	29.2522
NSL438037	AusTRCF306351	Yes	2.09283	17.6361	2.2521	20.7972	4351.82	1306.66	4.34226	0.429499	0.257133	3142.54	30.5309
NSL438038	AusTRCF306352	Yes	2.22208	40.21	2.28807	27.1967	5291	1556.9	7.43358	0.376229	0.292673	3590.5	35.2933
NSL438039	AusTRCF306353	Yes	2.28937	39.0451	2.28873	22.1833	4395.57	1328.39	5.75554	0.429806	0.305694	3074.71	31.2076
NSL438040	AusTRCF306354	Yes	2.27084	25.0482	1.86708	22.073	4321.2	1365.71	4.88222	0.424639	0.168828	3063.15	29.4814
NSL438041	AusTRCF306355	Yes	2.14314	29.1884	2.01482	24.0602	4460.73	1370.71	6.49725	0.407023	0.170421	3355.31	32.2048
NSL438042	AusTRCF306356	Yes	2.30762	34.3667	2.23657	25.2898	4421.81	1254.05	5.95146	0.33888	0.238416	3058.8	34.7766
NSL438043	AusTRCF306357	Yes	2.18461	22.3886	1.81807	25.31	4398.59	1270.34	4.41294	0.542104	0.161917	3160.9	29.518
NSL52605	OH7K	Yes	2.29616	34.2113	2.49531	26.6347	4245.63	1290.12	5.79544	0.433508		3171.12	40.3696
NSL53081	SC276Q	Yes	2.08558	64.8674	2.24828	25.2255	4887.71	1436.63	6.29592	0.489713	0.282525	3673.01	33.8676
NSL53084		Yes	2.17649	47.9952	1.99971	24.9446	3637.46	1274.21	5.80705	0.456374	0.214969	2927.49	28.3679
NSL53086	SC212M	Yes	2.53916	21.3291	2.72124	24.9253	4264.98	1314.37	4.58575	0.474964	0.247534	2933.56	31.7805
NSL53089	SC285	Yes	2.26709	35.7266	2.75341	22.5979	4273.07	1260.46	5.72713	0.557687	0.307764	3022.2	35.9189
NSL53093	SC353	Yes	2.22941	32.8119	1.75139	25.1326	3932.07	1216.13	5.49809	0.476402	0.245133	3193.74	29.6535
NSL53094	SC357	Yes	2.14465	31.9988	2.14769	26.382	3737.92	1332.77	5.6226	0.501044	0.239285	2867.93	29.1589
NSL65863	B7	Yes	2.04493	35.8047	1.42273	23.2312	4643.18	1168.33	5.27841	0.411237	0.213402	3333.79	29.4154
NSL65864	B8	Yes	2.05445	34.4892	1.75093	21.377	4174.29	1248.57	6.40974	0.43558	0.298708	3089.27	29.9527
NSL65865	B10	Yes	2.29265	29.2988	2.81489	19.5156	3456.26	1243.37	4.48739	0.475509	0.272556	2847.56	26.5839
NSL65866	B14	Yes	2.68289	32.1619	1.95601	21.0256	4732.77	1384.84	5.89318	0.436952	0.267581	3761.19	21.9489
NSL65868	B21	Yes	1.98623	22.1921	2.43465	23.8649	4788.2	1464.42	7.99075	0.569298	0.674419	3886.33	30.3471
NSL65869	B38	Yes	2.01068	41.5237	4.22574	22.4321	4379.53	1394.85	4.58924	0.436108	0.580582	3316.15	24.957
NSL65871	I205	Yes	1.92377	52.6926	1.70214	18.4249	4359.62	1206.75	5.43297	0.531955	0.261312	3275.12	25.0382
NSL65872	L289	Yes	2.16843	36.9323	1.96699	19.6845	4620.05	1337	7.38391	0.522795	0.5906	3482.78	30.708
NSL65873	L317	Yes	2.16266	25.7019	2.23408	19.2283	4216.46	1362.74	4.36325	0.526816	0.213631	3182.32	28.884
NSL65874	Os420	Yes	2.48797	49.3817	2.34411	35.2441	5041.78	1618.61	9.04572	0.570573	0.269046	3954.56	38.3923
NSL67786	Mo301ae	No	2.23417	54.0258	3.20715	27.6488	4883.81	1396.54	6.29628	0.486616	0.294897	3568.57	31.964
NSL67789	Mo304ae	No	2.53261	73.6959	2.19382	25.4037	5092.5	1320.6	7.39293	0.583567	0.406705	3143.89	36.0803
NSL67790	Mo305ae	No	2.55862	49.859	3.07072	25.8888	4522.51	1555.33	6.86313	0.575429	0.42669	3412.89	39.4895
NSL67792	Mo307ae	No	2.30943	50.4258	2.24759	27.0658	6199.22	1313.23	6.61927	0.539378	0.0960678	3835.77	29.7086
NSL67793	Mo308ae	No	2.33663	76.9321	2.64076	28.5677	4284.17	1568.75	10.9436	0.433869	0.388873	3409.24	32.2371
NSL67796	Mo311ae	No	2.35913	41.3997	1.60231	26.5877	5969.97	1762.01	7.9723	0.540217	0.00934723	3672.98	31.9163
NSL67797	Mo312ae	No	2.39441	56.1377	2.99966	28.3458	5342.46	1707.58	6.34081	0.517464	0.196901	3560.94	30.9225
NSL67798	Mo313ae	No	1.99026	71.1519	4.44913	28.9045	5309.62	1542.67	7.85069	0.467124	0.382058	3709.38	34.6095
NSL67799	Mo314ae	No	2.35366	73.5897	4.22095	28.7513	5051.96	1610.36	8.91519	0.633756	0.256498	3546.12	35.3303
NSL68211	OH422	Yes	2.47704	48.9973	2.05136	17.6201	4325.31	1370.16	8.09215	0.602245	0.124193	3430.9	27.7861
NSL68241		Yes	2.12381	36.9815	1.95725	25.2061	3613.55	1226.51	5.51505	0.501214	0.191031	2840.62	23.7769
NSL68242		Yes	2.3049	16.9305	2.51113	27.7765	4125.66	1235.39	4.4388	0.488794		2833.96	30.5188
NSL68243		Yes	2.09795	39.7047	1.87173	23.1389	3734.91	1303.69	4.56451	0.424646	0.290743	2959.74	29.8201
NSL68247		No	2.19273	22.357	2.57882	21.7044	3959.04	1371.57	6.32787	0.465184	0.468903	3339.67	29.9205
NSL68249		Yes	2.25452	38.416	2.86583	23.7184	4910.76	1560.2	6.50842	0.508026	0.173575	3857.54	29.3618
NSL68252		Yes	2.12893	33.4067	2.32687	26.7993	4007.07	1444.98	4.43846	0.538841	0.176239	3085.33	30.5552
NSL75970	IA28	No	2.06286	46.7367	4.21579	29.4217	4190.56	1435.85	8.10029	0.515755	0.386932	3446.15	47.0529
NSL75971	IA61	No	2.56408	91.5174	4.48634	25.6329	3600.44	1298.67	8.25721	0.64072	0.234626	3091.71	40.6835
NSL75976	IADS61	No	2.6079	58.7601	4.98569	28.7504	3712.37	1281.26	7.83859	0.540006	0.268166	3096.54	45.4096
NSL75977	IADS62	No	2.27632	58.7321	2.71075	20.8442	3687.2	1256.45	8.75704	0.411919	0.270269	2909.89	38.2221
NSL75979	Sg18	No	2.18107	42.5112	2.66646	23.5147	4007.47	1331.3	8.63683	0.461338	0.39852	3096.03	39.5182
NSL75980	SG30A	No	2.48418	63.8922	2.08353	31.1344	3850.56	1388.04	7.93757	0.48155	0.132296	3169.39	31.1933
NSL81595	A238	Yes	2.10154	67.4762	2.05522	24.5065	4124.86	1293.64	5.76978	0.561722	0.152317	3186.9	30.7113
NSL81596	A258	Yes	2.30096	55.2925	2.29095	22.2485	4321.07	1158.32	6.42109	0.557989	0.309482	3083.41	29.0387
NSL81597	A648	Yes	2.59952	66.3167	1.78442	18.849	4182.41	1283.22	4.56783	0.375612	0.139626	2980.27	23.4411
NSL81598	A657	Yes	2.15658	42.9977	2.21926	20.1524	4232.4	1267.39	6.29445	0.552855	0.155852	3084.87	28.4299
NSL81600	A660	Yes	2.32829	56.109	2.14565	21.9227	5042.66	1319.79	7.88162	0.415956	0.227061	3578.45	30.5997
NSL8581	81-1	No	2.22251	42.747	1.71812	29.0241	6011.53	1335.12	4.94159	0.459889	0.237047	3557.68	32.6225
NSL8582	P51B	No	2.11519	30.3555	1.69767	35.1074	5182.14	1387.8	5.7543	0.464509	0.290556	3468.24	37.6405
NSL8583	P39A	No	2.05615	35.4663	2.63646	25.2456	4903.39	1203.32	5.02204	0.521149	0.089195	2937.72	33.4032
NSL8585		No	2.38056	45.1902	2.6901	26.6661	5319.16	1258.45	4.91024	0.532807	0.194361	3148.08	36.6952
NSL91618	Oh28	Yes	2.13736	37.8827	1.81065	21.9608	4420.9	1274.09	6.70141	0.466057	0.301104	3307.6	27.9813
PI186182	INBRED378	Yes	2.178	47.1877	2.51674	22.6579	4328.04	1233.54	5.88872	0.512177	0.064322	3134.37	32.4234
PI186183	INBRED379	Yes	1.89154	47.0529	3.13382	25.0713	5302.31	1155.14	6.28801	0.495723	0.0645627	3678.28	35.2679
PI186185	INBRED605	Yes	2.00037	43.3853	3.2693	25.1059	4097.55	1330.17	7.87575	0.436312	0.0630448	3176.52	31.8193
PI186188	INBRED619	Yes	2.27087	58.3471	3.61951	27.1378	4237.59	1551.37	8.88689	0.488591	0.185388	3597.71	36.7678
PI186191	INBRED627	Yes	2.00155	62.2385	3.65524	30.4238	4979.25	1406.08	10.1637	0.601461	0.125025	3637.73	40.4805
PI186192	INBRED45	Yes	1.96845	40.1756	1.67166	24.7618	3954.23	1270.43	4.92188	0.553298	0.475417	3282.79	30.2007
PI186193	INBREDA-243-1	Yes	1.74926	49.6542	2.86943	26.3145	4329.34	1463	8.8567	0.490344	0.0468656	3610.68	30.0414
PI186195	INBRED41	Yes	2.01584	45.0249	1.96065	30.69	5035.11	1320.3	5.91525	0.510836	0.207201	3537.71	32.815
PI186196	INBRED109	Yes	2.1502	104.255	2.1557	27.9635	4503.02	1494	7.5268	0.418904	0.223917	3397.22	32.0125
PI186197	INBRED100	Yes	2.19469	34.7347	1.8334	26.3499	4888.9	1355.89	4.57724	0.615533	0.20867	3565.92	26.9531
PI186199	INBRED141	Yes	2.2082	46.3843	1.78339	23.5957	4365.81	1373.89	6.1694	0.508379	0.0879925	3377.71	23.6031
PI186215	INBRED2-687	Yes	1.88151	63.9174	3.19956	22.774	4754.5	1568.06	10.968	0.710976	0.11787	3658.25	34.9932
PI186216	INBRED1-1265	Yes	2.43066	33.4991	2.03315	20.9393	4208.91	1195.06	6.58923	0.535305	0.221922	3285.67	27.6974
PI186217	INBRED19-86	Yes	2.16092	48.6454	2.2122	24.8825	4377.69	1249.35	5.74696	0.479412	0.367207	3534.07	35.0215
PI186218	INBRED34-1141	Yes	2.33725	69.1046	2.1644	25.4514	4346.55	1535.07	6.93763	0.403532	0.15553	3652.79	34.1706
PI186219	INBRED34-1181	Yes	1.91088	64.4259	2.86722	20.2653	3850.67	1348.48	8.9972	0.617533	0.1566	3091.85	30.4635
PI186221	INBRED39-1084	Yes	2.17591	38.5525	3.10472	23.4986	4706.32	1307.63	5.52994	0.391396	0.176264	3379.64	30.8853
PI186223	INBRED41-1781	Yes	2.00274	43.9906	1.98195	23.9629	4151.86	1284.32	5.61764	0.407821	0.120515	3127.66	26.9483
PI186224	INBRED42-492	Yes	2.00917	38.6312	3.00483	23.8696	3995.66	1235.86	3.82454	0.464822	0.0646322	3054.01	28.4968
PI186226	INBRED305	Yes	2.09171	39.1791	3.43385	23.7824	4286.39	1270.34	7.86086	0.413214	0.105123	3224.27	30.1035
PI186227	INBRED309	No	2.28403	42.5078	2.6832	22.1789	3951.68	1204.66	6.56175	0.553971	0.0141563	2977.56	26.4808
PI186228	INBRED317	Yes	1.84722	60.0302	1.95925	23.3152	3900.72	1292.16	6.17084	0.462032	0.0482916	3071.37	25.3526
PI186229	INBRED321	Yes	1.81732	51.2395	4.71295	26.1782	4075.96	1364.37	7.14129	0.467779	0.177356	3325.09	37.0992
PI186230	INBRED334	Yes	1.9773	35.5209	3.16902	24.0949	4245.02	1417.38	5.45446	0.629595	0.191097	3526.65	36.9304
PI198888	4F-35BK	Yes	2.17056	65.0051	2.37891	22.874	4572.12	1238.51	3.76522	0.425751	0.135995	3253.49	26.3143
PI198889	4F-182BS11	Yes	2.05686	56.0631	2.09992	24.5263	4906.51	1297.55	5.41743	0.518187	0.278347	3771.62	32.2142
PI198892	4F-234BX4	Yes	2.51204	85.4767	4.40345	24.3557	4699.49	1314.44	8.61672	0.454779	0.164857	3771.76	39.1528
PI198893	4F-240BX16	Yes	1.84991	27.8599	1.9784	27.1835	4798.97	1530.66	8.44037	0.618604	0.243452	3536.23	31.8097
PI198894	4F-259HQ	Yes	2.0555	67.6513	1.22919	25.7939	4161.37	1384.99	8.3355	0.453898	0.0626545	2907.41	30.1613
PI198895	4F-285TX15	Yes	2.10122	50.3389	2.42037	26.2432	3712.37	1384.93	9.34828	0.45503	0.0810179	3217.13	36.9405
PI198896	4F-300AD3	Yes	2.14934	64.3489	3.80463	23.963	4627.13	1273.61	5.79332	0.534475	0.09765	3337.77	33.2276
PI198901	4F-342CM4	Yes	1.89875	28.8226	3.87976	26.8261	4898.96	1325.2	7.79128	0.289966	0.180119	3751.35	32.737
PI198902	4F-345CN12	Yes	2.14141	59.5327	2.30804	28.2303	4964.38	1406.54	7.26372	0.515717	0.00125955	3479.45	28.2712
PI198904	4F-353CN33	Yes	2.11795	52.9802	2.45191	27.2342	4616.9	1307.67	5.54547	0.543392	0.147335	3469.33	33.8495
PI198906	4F-403JV15	Yes	2.27965	36.5663	2.60059	23.5735	4347.63	1292.4	7.28142	0.586308	0.21366	3363.38	34.4826
PI200179	NY3NevehYaar	Yes	2.42401	34.589	1.6872	23.37	4576.63	1149.33	4.84575	0.521283	0.438004	3094.05	26.8873
PI200181	NY65NevehYaar	Yes	2.45952	43.1893	3.66539	25.649	4397.56	1360.31	6.71945	0.415774	0.145893	3333.18	32.649
PI200182	NY159NevehYaar	Yes	2.33605	45.2856	2.24186	27.1104	5244.31	1388.88	9.27176	0.60129	0.254771	3977.67	33.6675
PI200184	NY166NevehYaar	Yes	1.85548	22.7573	2.04922	19.6915	4124.72	1124.81	6.96585	0.474469	0.0807403	3054.08	28.9622
PI200185	NY188NevehYaar	Yes	1.95428	39.041	2.20568	20.3887	4286.28	1343.97	4.8944	0.686186	0.320875	3370.31	23.5828
PI200187	NY318NeveyYaar	Yes	2.29286	35.2068	2.06346	24.4305	4906.67	1430.42	6.17954	0.48804	0.126147	3197.15	26.169
PI200188	NY364NevehYaar	Yes	2.32661	37.7662	2.71467	23.6205	4473.58	1335.96	4.00167	0.44917	0.170475	3398.12	28.0053
PI200191	NY476NevehYaar	Yes	1.78309	14.8928	1.89768	23.8892	4395.65	1343.26	5.0171	0.491152	0.156718	3354.53	34.2994
PI200192	NY592NevehYaar	Yes	1.70419	69.3331	2.32532	34.2423	5489.14	1581.62	8.46356	0.476668	0.295711	3994.88	35.3997
PI200193	NY643NevehYaar	Yes	2.21274	40.2818	3.90716	22.4804	4685.24	1409.95	7.02466	0.425782	0.339127	3436.89	38.0496
PI200194	NY971NevehYaar	Yes	2.36717	35.3919	1.69103	28.4264	4345.4	1386.32	6.15454	0.470451	0.0500049	3380.66	29.1682
PI200195	NY992NevehYaar	Yes	1.91703	41.8988	2.57482	26.7775	4460.39	1346.9	6.72829	0.443301	0.204206	3492.49	33.9281
PI200196	NY1000NevehYaar	Yes	1.86413	32.3739	0.905078	21.6303	4879.94	1249.19	5.22355	0.50078	0.370734	3364.32	29.3653
PI221733	A13-2INBREDPOTCHEFSTROOMPEARL	Yes	2.61007	66.8556	3.57194	29.2795	5415.69	1790.55	9.54611	0.53198	0.598496	4089.12	28.2315
PI221734	A14INBREDPOTCHEFSTROOMPEARL	Yes	2.19831	42.798	3.71654	22.2268	4565.17	1477.27	5.97161	0.448539	0.318417	3502.17	31.3424
PI221735	A15-1INBREDPOTCHEFSTROOMPEARL	Yes	2.63003	38.3787	3.24129	23.5864	4887.14	1363.06	7.1098	0.462722	0.490361	3602.78	37.054
PI221736	A16-3-2INBREDPOTCHEFSTROOMPEARL	Yes	2.31749	32.4166	2.86752	21.013	4267.82	1229.67	5.12569	0.425913	0.486675	3250.73	32.3261
PI221737	A17-1-1INBREDPOTCHEFSTROOMPEARL	Yes	2.78817	57.3826	1.85942	22.2187	4994.84	1450.78	7.73936	0.550225	0.370795	3608.26	36.8645
PI221738	A20-4INBREDHICKORYKING	Yes	2.39776	27.414	1.94425	21.4345	5006.78	1455.06	7.39346	0.568842	0.295567	3778.72	25.7848
PI221739	A21-4-1INBREDHICKORYKING	Yes	2.26799	36.0665	1.78374	21.6707	4886.54	1370.76	7.02667	0.52695	0.289207	3500.02	25.5356
PI221743	N72-3-1-1INBRED	Yes	1.85995	13.6019	4.11188	29.4251	4427.75	1519.94	10.7945	0.537023	0.208945	3637.1	34.8904
PI221747	E205-1-1-1INBREDS5SYN.ANVELD	Yes	1.98372	69.1956	4.42245	21.4227	4398.31	1348.7	5.50374	0.397417	0.105785	3297.42	28.9743
PI221750	E292-1-1-1INBS5SYNANVELDXMINN.706	Yes	2.05313	50.0628	1.96832	19.4948	4764.32	1324.63	7.34919	0.408627	0.110817	3677.81	31.2787
PI221773	A415-1-3INBRED	Yes	2.48238	42.8918	2.57497	23.4291	6165.04	1527.37	8.57782	0.5142	1.12122	4222.53	29.9707
PI221775	A436-1INBRED	Yes	2.1344	76.471	2.02913	22.3754	4934.87	1406.37	6.16501	0.490251	0.190791	3437.93	28.5887
PI221788	E680-2-1-3S5INBRED	Yes	2.11682	51.1442	2.3164	19.5023	4033.82	1368.87	5.12612	0.520748	0.0193316	3237.25	25.1528
PI221789	E683-1-2-1S5INBRED	Yes	2.06024	41.6028	2.43805	24.9092	4835.69	1404.13	5.81838	0.536099	0.169195	3613.49	29.5151
PI221790	E684-1-1-1S5INBRED	Yes	2.3594	62.3879	1.83052	21.9856	5030.6	1673.02	9.55098	0.462613	0.237947	4029.93	39.0745
PI221794	E697-1-1-1S5INBRED	Yes	2.06341	25.0995	3.84662	27.8633	4898.48	1311.24	4.93128	0.409725	0.167177	3374.8	30.8978
PI221797	F755-2-2-1S4INBREDTEKO	Yes	2.27275	72.9041	2.35382	23.3909	4869.53	1455.31	8.9922	0.635796	0.443781	3389.79	34.1512
PI221804	A242-2S10INBREDPERUVIAN	Yes	2.07052	61.9916	3.44594	29.5741	4335.82	1515.95	9.63364	0.458238	0.289736	3343.73	31.6132
PI221805	A243-1-2S10INBREDPERUVIAN	Yes	2.00764	43.9102	2.89014	22.8438	4569.11	1271.9	4.54611	0.551074	0.22519	3259.67	29.9743
PI221811	A302-1-2S10INBREDSERVENTINA	No	2.36093	46.1584	2.23507	23.9414	3791.15	1320.88	5.94877	0.406646	0.1714	3141.54	24.5173
PI221813	A325-1S10INBREDHOTNOT	Yes	2.0078	66.6665	2.80168	20.488	4557.88	1212.55	7.85064	0.426142	0.170718	3238.22	27.5458
PI221817	A413-3A-1-1S10INBREDROBYN	Yes	1.9843	41.0265	3.11429	25.393	4636.58	1374.65	8.63418	0.447673	0.172563	3806.97	31.488
PI221820	C410-1F11INBREDHOTNOTCROSSES	Yes	1.75357	59.9112	2.16907	22.8642	4123.58	1335.41	6.27178	0.416858	0.345915	3251.42	32.6805
PI221821	E680-3-1-1S6INBRED	Yes	2.14142	65.0024	2.4099	20.6164	3910.59	1377.47	6.14145	0.511908	0.0352947	3196.75	25.6905
PI221822	E783-1-2-1S6STS.4222INBRED	Yes	2.25352	29.7897	2.67239	21.0958	4662.05	1161.49	5.5626	0.500086	0.20413	3095.6	28.3021
PI233312	42	No	2.04587	39.615	3.03919	24.2404	4419.58	1325.13	7.0206	0.467515	0.227007	3201.5	39.0322
PI233313	176	No	2.16122	28.7642	4.00005	29.4994	5044.5	1394.81	6.18938	0.471788	0.220071	3508.99	38.4735
PI233314	226	No	2.11347	38.2687	3.11042	35.2796	4837.88	1434.36	7.22555	0.416781	0.223001	3538.64	39.3429
PI233316	469	No	2.12918	45.3874	3.20533	27.2787	4664.9	1414.86	7.21261	0.472114	0.309622	3303.19	35.7476
PI233317	592	No	1.9601	44.2333	2.52357	25.0005	4106.31	1268.71	5.38604	0.511898	0.116311	3010.51	37.1254
PI233318	789	No	1.97087	40.483	3.41465	29.6457	5101.52	1380.04	6.81686	0.501891	0.361857	3523.02	36.8093
PI233320	883	No	1.92243	56.5263	2.5986	28.9562	5574.52	1508.51	8.16726	0.410529	0.316645	3530.71	42.1176
PI233321	908	No	2.38641	38.8515	2.1458	23.5164	5070.86	1338.84	5.26999	0.476703	0.205353	3313.37	37.5651
PI233322	909	No	2.11183	59.5794	2.49874	28.8978	6372	1499.71	9.23642	0.458184	0.41252	3637.24	41.7919
PI233323	884	No	1.92491	45.4202	2.3211	25.7727	4443.44	1339.88	6.79115	0.462875	0.175126	3111.7	32.2932
PI236997	Inbred6-907	Yes	2.2286	39.391	2.37891	22.5331	5349.76	1491.5	7.42894	0.503902	0.431226	3351.12	39.6791
PI257506	F2	Yes	2.29349	38.1441	2.82672	36.3255	5117.54	1315.9	10.7147	0.470036	0.189791	3848.61	43.9535
PI257507	F7	Yes	2.18016	31.8973	2.77108	30.5612	4567.84	1299.02	9.76494	0.542087	0.124598	3147.97	33.9751
PI257508	F10	Yes	1.94337	60.1587	2.40929	31.6354	4764.61	1480.68	6.2953	0.571622	0.418029	3341.71	39.4681
PI257513	F115	Yes	2.00704	69.5416	2.46854	22.6589	3890.99	1274.58	6.27004	0.598175	0.204092	3017.88	26.6031
PI257514	FV181	Yes	2.15031	46.061	4.16378	30.0982	5470.97	1486.61	8.3229	0.619169	0.154479	3872.77	36.4116
PI257515	F431	Yes	2.26117	25.1634	1.81611	20.3961	5099.15	1375.68	5.63773	0.492706	0.138616	3353.84	26.8747
PI267164	CR2INBRED	Yes	1.94945	38.1261	2.66269	27.4536	4375.4	1506.47	5.40817	0.462553	0.615232	3405.62	31.8087
PI267165	CR22INBRED	Yes	1.80155	30.724	2.28793	29.8568	4275.64	1451.53	7.22724	0.513619	0.140361	3608.25	33.3523
PI267166	2KM368INBRED	Yes	1.89053	68.3436	1.74702	25.5183	3896.83	1123.66	6.14456	0.395819	0.159306	2814.99	27.1272
PI267167	T8144INBRED	Yes	2.23309	45.611	4.23571	27.9909	5267.08	1465.26	10.0354	0.516781	0.362784	3875.76	42.9337
PI267168	T8146INBRED	Yes	2.3562	47.8071	2.35731	18.799	4952.66	1388.52	8.17397	0.482532	0.280319	3634.68	31.7764
PI267169	T8302INBRED	Yes	1.84423	50.2954	2.2658	22.0213	4058.09	1484.79	10.3344	0.412333	0.282908	3246.47	38.784
PI267170	T8354INBRED	Yes	2.10276	70.6261	2.86776	22.1318	5135.63	1455.2	7.66958	0.671923	0.265814	3337.13	31.3442
PI267171	T8445INBRED	Yes	2.2955	36.9335	4.20214	25.7695	4168.89	1441.07	5.71625	0.403306	0.230171	3625.78	34.611
PI270297	B96	Yes	2.30695	41.3508	1.84865	19.7244	4209.55	1320.29	6.64365	0.402833	0.169394	3214.42	33.8115
PI303924	NO.380	Yes	2.04448	33.8218	4.75958	30.9276	4650.46	1632.69	7.94352	0.507614	0.38013	3776.21	38.9365
PI303925	NO.1004INBRED	Yes	2.06818	42.278	2.37891	19.8765	4321.5	1251.96	6.63897	0.504486	0.185714	3406.36	25.1318
PI303926	NO.1019INBRED	Yes	2.57806	42.7276	4.90275	23.3025	4566.59	1363.09	6.51165	0.418927	0.231791	3224.18	33.637
PI303928	NO.1032INBRED	Yes	1.90751	36.4554	3.58672	24.6556	4386.2	1178.42	6.73778	0.392776	0.158266	3264.8	25.4898
PI303929	NO.1037INBRED	Yes	2.14476	21.9264	2.64246	23.5112	5546.82	1393.13	5.77832	0.423042	0.183296	3914.45	29.1322
PI303930	NO.1049INBRED	Yes	2.71502	35.0563	2.16431	26.9912	4828.96	1604.9	7.86485	0.50178	0.130626	3688.32	39.4504
PI303932	NO.1068INBRED	Yes	1.83121	63.9082	2.56431	20.8165	3803.06	1368.06	7.38712	0.56581	0.133867	3332.37	32.012
PI303933	NO.1070INBRED	Yes	2.08009	56.7558	3.836	22.456	4495.74	1314.25	6.57489	0.452476	0.145117	3435.52	28.3691
PI303936	NO.1174INBRED	Yes	2.21658	45.9803	2.23363	24.9567	4989.36	1260.72	6.42731	0.480362	0.0810262	3069.68	31.3012
PI303937	NO.1175INBRED	Yes	2.05348	56.2138	2.3524	24.0716	4157.23	1417.03	9.34147	0.663596	0.152995	3377.74	32.9516
PI303938	NO.1185INBRED	Yes	2.58285	27.8661	3.12484	33.9816	5054.07	1474.81	7.83855	0.510489	0.213382	3578.71	41.8485
PI303939	NO.1197INBRED	Yes	2.11127	44.3961	3.53545	28.4157	4529.42	1430.89	7.04375	0.701299	0.206856	3389.27	35.7559
PI303940	NO.1201INBRED	Yes	2.08244	50.8955	3.02276	25.0889	4725.15	1494.67	9.93902	0.546383	0.19144	3570.18	31.7907
PI303941	NO.1266INBRED	Yes	1.91448	30.9245	2.27506	23.3693	4716.74	1405.81	6.15682	0.46781	0.0317061	3568.93	28.8129
PI303943	TN53-1-2	Yes	2.22997	45.9542	4.37831	24.0564	4112.75	1368.71	5.33882	0.510737	0.36423	3332.06	32.7101
PI303944	TN50-14-1	Yes	2.13803	61.3243	2.13729	21.8387	4286.83	1244.64	4.20384	0.475891	0.6478	2916.49	29.2925
PI340812	NY121NevehYaar	Yes	2.56933	35.6819	2.14565	20.6945	4845.26	1257.49	5.43415	0.345923	0.24748	3378.77	31.5743
PI340813	NY123NevehYaar	Yes	2.17962	50.3222	2.56962	26.183	4428.31	1217.66	6.24213	0.441197	0.345537	3131.96	27.5595
PI340817	G3T5	Yes	2.09964	36.7941	2.24616	26.2923	4914.45	1470.47	5.4204	0.422688	0.489937	3504.91	35.856
PI340818	G3T5a	Yes	2.28275	36.9597	3.17743	24.829	4630.37	1686.77	7.24398	0.535986	0.355853	3860	40.9308
PI340819	T9	Yes	2.11908	26.166	2.11658	23.9336	3860.7	1211.8	6.14638	0.355027	0.100768	2923.3	32.1995
PI340820	T14F	Yes	1.95379	42.5815	4.0176	31.5921	4020.35	1350.39	8.6622	0.428591	0.292367	3444.42	31.5974
PI340822	G6T123	Yes	2.0378	36.2372	2.54817	19.639	3544.62	1268.89	6.23126	0.428864	0.120554	3077.66	29.537
PI340824	G15T134	Yes	2.25649	34.1375	2.55603	26.2393	4346.68	1436.96	5.31383	0.502223	0.167845	3129.1	32.4125
PI340825	G15T134a	Yes	2.12369	42.94	3.56989	30.989	4019.07	1446.78	5.69236	0.48686	0.270223	3153.66	41.2728
PI340826	T140	Yes	1.99607	41.6614	2.42717	30.8474	3891.48	1306.49	5.52345	0.618787	0.212125	3052.86	29.8095
PI340827	T141	Yes	2.18835	30.1728	2.55271	23.7088	4586.32	1259.09	5.30467	0.465953	0.148339	3339.37	34.5103
PI340829	T146	Yes	2.07977	78.5448	2.75215	28.1966	3898.25	1587.98	7.68861	0.481737	0.299364	3660.77	39.3437
PI340830	T242	Yes	2.07742	46.1419	2.73426	19.2036	4096.25	1102.38	5.48488	0.321024	0.0533296	2618.6	24.7507
PI340835	BR-1-1	No	2.0741	35.5571	3.95641	20.3738	4103.33	1392.88	9.3019	0.459068	0.307874	3316.46	37.5616
PI340837	R-4524	No	2.21484	39.3233	2.02678	24.6194	3945.55	1337.73	7.06893	0.529258	0.28681	3280.12	40.5925
PI340838	B-4541	No	2.16421	36.8838	2.27429	23.1935	3456.26	1162.49	5.80466	0.500764	0.144355	2847.56	31.6403
PI340841	B-15DENTSTERILE	No	1.97218	36.8969	2.28248	21.2264	4162.82	1229.05	6.4631	0.480473	0.310003	3015.12	39.0837
PI340843	CA-15-2DENTSTERILE	No	2.10084	27.2659	2.64266	23.7773	4226.8	1380.78	8.07575	0.542333	0.231153	3380.2	36.287
PI340844	R-15DENTSTERILE	No	2.37238	43.9171	3.07895	21.8764	3621.2	1304.43	6.59735	0.526202	0.22885	2996.24	37.5012
PI340845	BR-15DENTSTERILE	No	2.21076	54.8689	2.93747	21.4151	3746.64	1258.84	6.93542	0.508991	0.276394	2953.44	37.7478
PI340846	RB-15DENTSTERILE	No	2.05815	31.6947	3.39842	21.3317	3669.35	1378.24	7.43788	0.471925	0.181254	3119.89	37.7973
PI340847	B-16INBR.FR.SUPERGOLD	No	2.59529	39.2273	1.91104	21.3852	3950.78	1249.15	4.82137	0.397193	0.114328	2877.13	31.9481
PI340850	B-17INBR.FR.SUPERGOLD	No	2.32368	38.279	3.1777	22.1497	3624.43	1225.14	8.84336	0.492623	0.165548	2802.46	40.0948
PI340851	BR-17INBR.FR.SUPERGOLD	No	2.295	41.0404	3.2563	21.2973	3297.75	1226.56	11.8789	0.405738	0.383739	2652.1	37.8054
PI340853	R-17INBR.FR.SUPERGOLD	No	2.41654	36.6916	2.92478	20.3666	3438.8	1183.82	8.30604	0.380694	0.290883	2817.46	33.915
PI340854	RB-17INBR.FR.SUPERGOLD	No	2.2804	35.768	3.95618	24.0667	4084.58	1460	11.8644	0.504991	0.173499	3310.34	44.8599
PI340855	B-18INBR.FR.SUPERGOLD	No	2.36329	48.198	3.02292	31.7286	4061.3	1437.91	8.67501	0.476223	0.0904883	3186.31	40.5376
PI340856	R-18INBR.FR.SUPERGOLD	No	2.07832	62.4057	1.43122	25.0155	3849.35	1415.86	7.71803	0.421338	0.154317	3343.45	32.1677
PI340857	B-22INBR.FR.SUPERGOLD	No	2.54643	33.3083	2.57163	25.0978	4152.33	1497.15	9.67271	0.412753	0.10869	3499.67	45.0277
PI340858	BR-22	No	2.1166	32.2602	3.86498	25.0877	4014.48	1509.34	8.96579	0.459149	0.487282	3669.25	36.9694
PI340859	R-22INBR.FR.SUPERGOLD	No	2.41556	50.2207	4.0008	26.0292	4282.66	1485.2	10.4881	0.519342	0.499649	3563.45	35.0282
PI340860	B-28	No	2.15578	45.9565	2.37891	25.6119	4490.45	1354.89	6.70957	0.452609	0.323639	3389.99	41.3159
PI340861	BR-28INBR.FR.YEL.PEARL	No	2.12585	62.544	3.32357	29.2349	3809.82	1315.9	7.33193	0.534863	0.293298	3132.91	53.4004
PI340862	R-28	No	2.52317	48.5418	3.44553	23.5613	3992.66	1286.54	7.85686	0.400797	0.418086	3212.21	39.9809
PI340863	R-28-2	No	2.18793	44.861	2.95801	27.3364	3876.27	1181.93	10.1563	0.485627	0.100915	3267.2	40.3449
PI340865	CA-53INBR.FR.YELPEARL	No	1.99617	60.9903	1.89735	23.3884	3765.51	1363.14	7.42118	0.446056	0.151113	3314.12	35.4839
PI340866	R-53-1INBR.FR.YELPEARL	No	2.68279	71.8268	1.69159	24.3878	3890.03	1543.36	10.745	0.544005	0.282896	3336.16	37.592
PI340868	RB-53INBR.FR.YELPEARL	No	2.77862	87.0696	2.98217	22.7049	3973.03	1415.56	10.0332	0.40245	0.118437	3172.98	35.5541
PI340869	R-PAH-1IN.FR.TOM-THUMB	No	2.20409	76.6972	2.37891	22.7448	3441.58	1109.84	6.75785	0.643122	0.282433	2568.03	32.9731
PI340870	R-PAH-2	No	1.97982	57.3016	3.56622	23.6383	3428.68	1346.88	6.55542	0.54705	0.288565	2857.82	37.6135
PI340874	IADS38-W	No	2.1649	61.8962	2.77353	19.8944	3790.36	1357.07	10.0579	0.477009	0.266086	3218.77	31.2429
PI340875	IADS43-W	No	2.08364	38.3625	4.55984	25.0169	4312.38	1407.52	9.49066	0.448654	0.21049	3379.04	38.3565
PI340876	IADS53	No	2.26575	75.8988	3.31815	24.7158	3525.65	1466.88	9.94529	0.436359	0.0634899	3258.32	40.0706
PI340878	IA88	No	2.87832	60.3327	3.53935	20.7279	4347.53	1385.2	6.47909	0.438058	0.31158	3299.31	31.4241
PI343953	PLS61/10870subline-1	Yes	1.99867	63.0986	1.8403	21.2876	4516.94	1421.58	8.58906	0.64931	0.19375	3501.76	32.7774
PI358521	STRAIN11D-586-68A	No	2.12067	50.206	2.14663	20.6301	4436.19	1344.87	11.6496	0.451538	0.227164	3183.67	31.0731
PI358522	13B-587-68A	No	2.36176	47.9661	4.43601	34.777	6001.04	1538.05	8.54538	0.528648	0.429024	3509.16	41.7201
PI358523	14H-588-68B	No	2.27158	49.1233	2.05969	22.3392	5661.09	1265.06	5.34525	0.424045	0.0610192	3555.72	27.5891
PI358525	27A-317-68C	No	2.44931	44.8127	2.60765	22.9089	5887.45	1369.26	6.27507	0.557411	0.234362	3400.59	30.1771
PI358526	197A-381-68A	No	2.86493	29.9256	2.4923	24.4202	6501.61	1414.6	8.22748	0.45644	0.223604	3676.61	40.0062
PI358527	STRAIN304A-408-68B	No	2.38925	43.4904	1.90368	30.888	5493.46	1572.41	8.01262	0.612592	0.128603	3627.44	36.4561
PI358528	442A-431-68D	No	2.28716	40.8232	2.46293	20.8594	6029.63	1424.77	8.5717	0.515407	0.15595	3373.05	30.0964
PI358529	STRAIN451B-4-68B	No	2.06075	37.8877	3.3515	22.9825	4467.54	1420.22	6.65127	0.478489	0.137459	3226.86	37.0323
PI358532	676A-348-68B	No	2.31365	43.7307	2.95642	28.4989	5135.57	1388.52	11.3171	0.539913	0.127391	3704.43	36.9875
PI358533	STRAINT36101T-394-68	No	2.29895	35.6647	1.85395	29.5823	5107.59	1480.11	5.75166	0.557948	0.0942483	3488.04	35.5858
PI358534	STRAINT20-2-68B	No	2.3071	60.3744	2.90484	30.8097	4941.99	1409.31	7.49032	0.45263	0.10704	3453.42	36.3306
PI358535	21-396-68B	No	2.15708	38.2543	2.22456	33.8148	5479.74	1504.01	7.74023	0.52041	0.109608	3684.08	42.1592
PI358536	STRAINT24-395-68B	No	2.45747	40.6126	2.8119	32.1229	5462.86	1523.42	8.80281	0.498018	0.103143	3693.52	39.3619
PI358537	STRAINT32-397-68B	No	2.22827	35.1316	2.8288	28.3551	5074.12	1446.09	8.08647	0.497245	0.223544	3646.04	41.2629
PI358538	STRAINT33-399-68B	No	2.10795	29.2817	1.64344	27.4188	5209.16	1424.49	7.59377	0.591689	0.0844089	3323.21	34.5755
PI369437	80-2	Yes	1.94207	48.9513	3.67133	30.0613	4479.02	1358.36	6.83876	0.558332	0.211444	3131.04	30.2203
PI369438	K10	Yes	2.71613	48.9361	3.07809	25.039	5729.36	1424.46	8.17932	0.482073	0.204116	3296.67	41.6657
PI369439	S14	Yes	2.23978	33.9994	2.77177	29.9944	6051.39	1431.35	5.81345	0.451086	0.121239	3570.01	39.5191
PI369442	S48	Yes	2.13248	52.7473	2.02983	19.906	3809.16	1390.8	5.6247	0.543636	0.110252	3206.48	30.3269
PI369443	S61	Yes	1.96508	37.4683	2.48984	24.137	4529.75	1521.55	6.58694	0.49379	0.145199	3469.32	31.202
PI369446	U123	Yes	2.20157	26.7866	2.03174	30.9198	4068.13	1482.84	5.2923	0.402089	0.334954	3242.68	31.3041
PI391414	PH9	Yes	2.13695	37.5011	1.75198	21.1094	4023.8	1311.48	7.01003	0.50447	0.241326	3087.51	29.1418
PI391660	CHI-41	No	2.02129	36.7318	1.90464	22.0879	4141.01	1230.36	4.11334	0.459361	0.117869	3042.95	25.1033
PI391662	KUNG-70	Yes	2.03393	25.2291	2.98455	21.5162	4975.55	1335.83	6.47924	0.487275	0.21377	3520.62	34.5062
PI391663	TIEH84	Yes	2.0309	30.8134	2.07493	23.5213	4446.17	1122.18	7.23657	0.495858	0.245402	2961.72	28.4002
PI391666	YING-64	Yes	2.09241	55.5893	1.43558	23.1179	4558.48	1345.11	7.60547	0.509973	0.172956	3507.82	30.6751
PI391670	NIU11	Yes	2.03076	49.6899	2.14113	31.6525	4555.29	1606.96	8.03301	0.704167	0.377908	3827.92	31.2528
PI391672	YANG	Yes	2.01198	57.401	1.46377	26.0671	4084.03	1233.31	4.72701	0.477128	0.337423	3077.66	25.3305
PI391676	TUO229	Yes	2.0816	53.3118	2.78256	26.6729	4941.02	1316.53	6.14092	0.551695	-0.00138861	3175.44	29.7691
PI391678	TZU-CHIAO-HSI-WU105	Yes	2.11542	52.9065	1.62543	24.4249	4211.46	1266.57	6.94761	0.456516	0.351048	3135.85	29.1301
PI391680	WU-TAN-TZAO	No	2.19888	52.7031	1.49015	26.0089	4678.36	1363.91	6.95101	0.46422	0.162721	3406.68	27.1964
PI391682	YE-CHI-HUNG	Yes	2.11563	51.1219	2.03851	26.6775	3994.57	1195.94	6.64637	0.543772	0.312071	2974.2	30.793
PI405705	CHAN11INBRED	Yes	2.37193	57.9955	3.12088	23.4699	5135.46	1509.04	9.18067	0.490629	0.678017	3484.68	30.0617
PI405706	CHI-69INB.	No	2.23981	28.9815	2.98248	19.7526	4579.35	1164.25	4.25089	0.643091	0.0863282	3013.47	26.8361
PI405707	HUA94INBRED	Yes	2.26804	27.018	3.42753	22.9004	4657.96	1243.56	5.00954	0.463768	0.107716	3166.24	29.1611
PI405709	TANGCHAOINBRED	Yes	2.13912	30.8708	2.60794	22.3294	4270.07	1403.86	6.89513	0.490569	0.50365	3321.62	32.8044
PI405711	BAITOUSHUANGIN.JI095	No	1.96915	39.8886	2.66876	31.1844	4260.22	1545.22	7.23499	0.624724	0.205217	3521.29	29.3855
PI405712	DABATANGINB.JI0241	No	2.20699	51.5931	2.87979	31.474	5009.82	1503.71	6.12591	0.459213	0.136717	3590.37	29.1578
PI405713	DAJINDINGJI0018	Yes	1.93616	61.1508	2.32584	27.3801	4799.41	1417.06	5.88213	0.408024	0.0307977	3240.36	26.5306
PI405714	HUOBAOMIJI0235	Yes	2.41644	43.8047	3.3586	27.4843	4764.96	1710.46	8.59682	0.602311	0.0739721	3729.81	30.8074
PI406106	A14NW	Yes	2.56267	33.1164	2.59755	24.2654	4543.03	1407.75	5.26878	0.614813	0.332153	3329.63	37.755
PI406107	A57N	Yes	2.20196	31.8007	1.60285	18.6379	3813.67	1119.98	3.93733	0.522536	0.133911	2889.62	32.5705
PI406108	A98NW	Yes	2.23458	32.8735	2.20913	25.1462	4489.45	1462.32	6.28936	0.511567	0.203924	3446.69	38.4678
PI406110	A178N	Yes	2.1626	30.0771	2.36984	25.3669	4766.69	1214.21	6.58435	0.496603	0.244283	3277.54	30.4119
PI406112		Yes	2.32763	21.9544	2.53946	18.5584	4595.58	1228.37	6.7924	0.432928	0.184136	3203.53	26.391
PI406114		No	2.20697	44.4842	2.46714	21.5341	4311.79	1302.28	6.55377	0.401405	0.163459	3157.74	32.383
PI406116	A347NW	Yes	2.19741	36.7281	1.85134	21.5753	4414.33	1296.94	5.3477	0.502985	0.76669	3337.07	31.9547
PI406118	A509N	Yes	2.32955	42.029	2.49545	21.8635	4408.47	1305.07	6.74049	0.508016	0.241173	3126.99	28.5248
PI406119	A553NOrangeHalo	Yes	2.79643	46.1055	1.98041	23.2816	4718.76	1359.52	6.96396	0.542382	0.362872	3249.54	27.6472
PI406120	A553NRedhalo	Yes	2.68881	42.2617	2.69472	26.34	5279.53	1379.81	6.22455	0.539825	0.338708	3338.92	31.3616
PI406122	A564N	Yes	1.92476	48.5082	1.73519	21.9564	4003.93	1270.79	5.7373	0.384289	0.133596	3010.09	30.3695
PI406123	A579N	Yes	2.42895	67.2908	1.83718	23.1285	3964.14	1203.33	6.11757	0.367003	0.0867028	2717.35	33.7186
PI406124	A622N	Yes	1.85113	28.9816	2.98627	21.1703	3789.1	1463.3	4.09615	0.51851	0.1459	3281.47	27.7305
PI406125	A641N	Yes	2.0471	32.2005	1.97033	18.9707	4862.94	1317.73	6.06447	0.380017	0.0497819	3594.86	22.3294
PI406127	A664N	Yes	1.94507	34.1076	2.04235	19.4437	4593.9	1306.89	6.22459	0.433068	0.104759	3614.18	23.4072
PI406128	A691N	Yes	1.89533	41.2368	2.11397	19.9001	4554.03	1283.92	7.06259	0.503345	0.319543	3396.56	27.6583
PI406129	A759NW	Yes	2.36551	24.9718	1.96861	20.042	4636.96	1431.84	7.15504	0.683821	0.283306	3581.26	35.3668
PI406130	A797NW	Yes	2.2976	21.3557	1.83484	20.9802	4926.52	1304.57	5.88753	0.490221	0.254928	3202.77	29.2782
PI406131		Yes	2.22146	22.748	1.83941	19.4456	4398.59	1224.59	5.43178	0.486095	0.301852	3110.31	27.6352
PI415079	4537.INBRED	Yes	2.1982	42.496	2.34811	28.9472	4268.32	1332.69	8.64716	0.417346	0.212496	3437.23	38.6749
PI415080	4550.INBRED	Yes	2.10992	43.9115	4.16063	23.7963	4228.55	1450.41	8.22346	0.406315	0.199401	3604.13	42.939
PI415081	4554.INBRED	Yes	2.05654	56.8631	4.34439	29.1952	3731	1391.34	9.18002	0.463984	0.268004	3293.27	39.1557
PI415082	4554INBRED	Yes	1.88833	65.7776	3.55862	23.8794	4129.5	1300.23	6.76097	0.578302	0.100505	3282.92	35.2127
PI415083	4562INBRED	Yes	1.98202	62.3177	3.30734	26.9085	4671.42	1633.35	7.68624	0.510939	0.184339	4002.82	40.0524
PI415084	4564INBRED	Yes	1.87613	35.4275	4.27375	26.54	4301.08	1386.1	7.19404	0.761023	0.26304	3690.18	32.8424
PI415085	4566INBRED	Yes	2.35123	48.798	2.82389	30.6872	4006.42	1332.4	9.7204	0.51134	0.209268	3251.62	34.2912
PI415086	4578INBRED	Yes	2.02459	52.4797	2.69303	24.1191	4130.35	1321.99	6.42386	0.52338	0.0495932	3190.06	30.1955
PI415087	4580INBRED	Yes	1.96642	54.6816	2.8854	24.1897	4193.58	1345.58	5.64489	0.491715	0.0450079	3396.1	31.0596
PI415088	4581INBRED	Yes	2.00567	41.5974	2.72947	26.1894	4466.16	1364.53	6.20945	0.464951	0.0548062	3446.54	31.6075
PI415089	4655INBRED	Yes	2.43729	32.6212	2.32181	31.4441	4519.24	1416.08	4.42046	0.745606	0.0425705	3006.92	37.1815
PI415090	4659INBRED	Yes	2.07823	28.5393	2.53938	30.6952	3858.88	1322.05	5.49242	0.654347	0.126994	2830.54	39.2999
PI415091	4664INBRED	Yes	2.37735	47.8885	2.52728	33.3403	5558.07	1373.14	6.60847	0.501552	0.239606	3297.72	47.6318
PI427109	Eng-liChih	Yes	2.17463	46.3366	2.22001	26.035	4407.1	1366.19	4.29916	0.521918	0.130758	3182.59	29.4792
PI427111	Chi-tan120	Yes	1.86567	45.6926	2.18603	24.3489	4392.92	1253.68	5.99118	0.522946	0.356988	3134.45	32.7726
PI433486	PriorB	Yes	2.12869	43.2478	3.19984	30.3669	4703.85	1349.9	8.05848	0.509771	0.487605	3696.59	32.1414
PI433487	PriorC	Yes	2.32161	53.0939	1.85847	29.0062	4595.19	1481.92	7.40415	0.480179	0.120654	3295.59	33.3002
PI459078	Honanno.7	Yes	2.19803	44.1423	1.73739	23.6368	4354.6	1416.56	5.51724	0.452037	0.0966134	3294.91	28.602
PI459080	Hwangno.525	Yes	2.53192	60.9493	2.47462	24.1784	4433.75	1291.44	8.92946	0.568748	0.306931	3320.94	36.0662
PI459082	Shansino.60	Yes	2.44292	40.8232	3.78035	18.5156	4170.39	1292.78	8.55195	0.398858	0.120235	3225.88	31.9813
PI506243	Tzi1	Yes	2.15416	56.7665	2.39192	21.6638	4686.13	1443.66	6.6214	0.513422	0.225043	3648.97	32.9532
PI506245	Tzi4	Yes	2.12368	69.884	1.5984	23.3192	4630.03	1339.54	6.05984	0.47279	0.184156	3058.17	25.2228
PI506247	Tzi9	Yes	2.15586	53.1279	1.55343	22.684	3500.24	1352.54	5.81787	0.494219	0.13165	2825.42	24.4089
PI506249	Tzi12	Yes	2.1114	40.5964	2.02608	21.0544	3945.4	1168.97	4.06393	0.411325	0.195405	2922.26	30.4176
PI506250	Tzi13	Yes	1.85653	22.8143	2.57382	20.7637	4892.94	1193.84	4.38198	0.490474	0.159206	3319.13	28.0385
PI506251	Tzi15	Yes	2.26669	22.1978	3.02085	23.0833	4182.09	1235.27	4.76635	0.573781	0.167802	3031.87	31.5054
PI506253	Tzi18	Yes	2.24619	34.6088	3.01821	19.715	4361.7	1386.27	5.38089	0.494873	0.150787	3484.83	32.0425
PI506254	Tzi24	Yes	2.0304	74.9145	2.15123	21.2176	4572.07	1437.19	7.5276	0.648392	0.275735	3463.55	31.9897
PI506255	Tzi25	No	2.24713	36.7157	1.66486	18.9215	4212.05	1190.18	4.4391	0.421395	0.183378	3084.11	26.2243
PI506256	Tzi27	Yes	1.90096	29.9597	3.2778	22.0846	4299.65	1261.64	4.41873	0.507343	0.147395	3032.63	26.9944
PI506257	Tzi28	Yes	1.99954	38.3401	2.18871	22.3563	4345.4	1134.19	3.84362	0.609807	0.255019	3050.5	30.2124
PI506258	Tzi30	Yes	1.98555	48.205	1.78757	29.7088	4500.81	1356.67	4.75826	0.468024	0.555584	3341.77	34.4099
PI506411	M6411	No	2.44939	58.8526	2.36947	24.6559	7500.69	1386.8	5.86136	0.484913	0.320887	3295.03	30.7914
PI506412	M6415	No	2.49971	54.0533	2.87619	22.1441		1386.01	7.50961	0.613498	0.311333	3440.67	33.1989
PI506413	M6421	No	2.6327	61.8864	3.0823	32.3889	6423.14	1444.34	8.64354	0.476494	0.312994	3718.95	36.679
PI508277	SD42	Yes	1.97556	44.9037	1.52421	20.6212	5040.4	1270.4	4.40466	0.391499	0.0894846	3540.14	27.9826
PI509045	T62S	No	2.18756	48.7957	2.42866	27.4223	5983.98	1600.7	4.62181	0.52908	0.560936	4169.27	40.6694
PI509542	B89	Yes	2.15582	41.801	1.39879	22.3265	4018.47	1293.89	5.81109	0.515437	0.327354	3086.44	28.5325
PI510674	ND261	Yes	2.02937	25.6437	1.57809	27.1237	5179.35	1465.97	6.38972	0.512917	0.283914	3812.55	31.0611
PI511309	NC252	Yes	1.91523	17.0927	1.91239	20.6514	3943.32	1063.26	3.77959	0.408908	0.153752	2714.32	27.8938
PI511310	NC254	Yes	2.1065	18.1903	2.42396	20.4204	4273.66	1213.58	3.78989	0.488561	0.0714497	2871.38	29.3302
PI511311	NC256	Yes	2.13551	29.7746	1.46583	21.18	4112.65	1129.04	3.79713	0.401517	0.134806	2747.76	26.8679
PI511313	GT113	Yes	2.36505	41.0819	2.29104	21.847	4575.24	1395.78	6.58881	0.541235	0.150885	3729.74	32.2292
PI511318	GT119	Yes	2.08737	42.4711	1.87854	26.3911	3931.01	1415.4	6.21314	0.442902	0.221977	3237.73	25.7314
PI511804	T165	Yes	2.04994	48.2031	1.95083	25.6712	3758.43	1445.25	6.76832	0.355141	0.157365	3144.79	31.0582
PI511805	T167	Yes	2.31124	36.0307	1.60568	26.2066	3949.37	1418.06	5.90053	0.378655	0.163921	3033.53	28.9924
PI517968	Pa392	Yes	2.27891	32.2026	1.30186	24.7683	4380.42	1407.95	8.09915	0.510986	0.345329	3454.87	33.0244
PI517971	Pa468	Yes	2.50669	34.302	2.63324	20.1353	4432.31	1389.96	6.43375	0.414869	0.0905091	3580.12	28.5523
PI517972	Pa877	Yes	2.08823	40.1517	1.57744	30.5268	4797.39	1452.45	6.00301	0.469674	0.526102	3339.91	38.7682
PI517973	Pa879	Yes	2.57589	20.2153	2.43959	23.2895	4449.42	1472.04	5.14178	0.513715	0.328316	3709.51	31.9001
PI517974	Pa880	Yes	1.85486	36.7088	1.51529	33.9324	5070.92	1546.87	9.98032	0.498677	0.422567	4092.16	36.3517
PI518660	SD43	Yes	2.18485	31.2069	1.39691	29.857	4546.08	1550.68	4.76265	0.369703	0.379323	3413.59	35.8453
PI520770	W552	Yes	2.14448	36.0998	2.016	21.4504	4037.92	1185.8	5.73327	0.456402	0.177489	3049.57	25.4801
PI520771	W570	Yes	2.00686	33.1548	2.01621	20.6875	4662.59	1310.9	4.34378	0.411802	0.177569	3464.86	25.0622
PI520772	W572	Yes	2.01266	38.8725	2.85099	19.2552	4546.95	1382.04	5.41583	0.39967	0.531646	3370.36	31.9025
PI520773		No	2.29009	52.7063	4.12714	36.5241	5389.8	1556.03	8.36428	0.452466	0.413863	3685.2	41.7378
PI520774	NC264	Yes	2.11464	64.6996	2.66548	20.7885	4179.2	1255.45	5.51124	0.478839	0.355634	3363.63	29.0197
PI522250	ND262	Yes	2.24195	43.87	2.58339	28.5171	4299.29	1370.24	6.0602	0.454418	0.246857	3190.66	34.2724
PI524969	SD44	Yes	1.9737	28.4141	0.98845	20.9728	3750.22	1246.66	5.89314	0.440222	0.181144	3192.88	26.2583
PI524970	SD46	Yes	2.52946	43.7264	1.2593	25.184	4458.08	1383.01	7.36585	0.444313	0.161868	3208.48	29.2697
PI527699	B90	Yes	1.92849	30.1055	4.61249	25.0064	4037.37	1142.79	4.64251	0.490212	0.368197	3109.49	27.7222
PI527700	B91	Yes	1.9421	13.4368	4.24796	25.0307	3780.43	1303.46	5.9	0.436812	0.0876105	2785.08	30.4309
PI531081	Pa356	Yes	2.14121	35.3593	1.41481	17.3496	4169.68	1129.51	5.32313	0.407953	0.131993	2940.01	12.5896
PI531082	Pa376	Yes	2.20347	64.6224	3.50236	29.6088	4281.09	1265.4	6.94969	0.501015		3282.79	34.9689
PI531083	Pa891	Yes	2.03153	30.7569	2.00255	19.8276	3888.29	1265.95	5.38219	0.638425	0.240464	3080.07	34.5127
PI531084	NC258	Yes	2.09176	38.1253	2.8808	20.8511	4403.42	1243.04	5.37016	0.441395	0.262081	2979.01	29.8724
PI531085	NC262	Yes	2.13037	31.8233	2.96132	25.4004	4324.2	1219.6	4.6641	0.43462	0.201123	3031.47	28.2794
PI531509	R225	Yes	2.38204	42.1622	2.58204	20.779	4283.35	1396.61	4.60536	0.601414	0.168426	3097.45	31.4074
PI531510	R226	Yes	2.3154	41.8039	2.37003	22.0968	5516.13	1380.08	5.45473	0.474209	0.338744	3355.08	34.1571
PI531511	R227	Yes	2.23172	44.6682	1.74193	21.7655	4313.67	1310.96	7.95111	0.531113	0.167306	3252.99	31.7372
PI533658	SD101	Yes	2.24585	51.3183	2.42396	18.3579	4048.38	1334.04	7.34889	0.501242	0.154669	3144.8	26.7521
PI533659	SD102	Yes	2.3461	39.4319	2.91675	23.2195	3930.6	1404.22	6.58295	0.443439	0.233503	3200.46	30.0948
PI534659		No	2.31309	33.2764	2.70572	22.8171	4136.66	1336.32	4.61018	0.544703	0.300632	3177.71	30.244
PI535900	S2	Yes	2.17296	59.7518	3.06548	26.5269	4427.26	1283.46	5.37943	0.498885	0.337718	3320.65	32.7729
PI535901	S3	Yes	2.22323	47.9675	2.71579	25.5578	4675.97	1412.17	5.97878	0.570692	0.172882	3421.03	31.4834
PI535906	S56	Yes	2.16111	84.3187	3.47881	35.2337	5002.03	1567.36		0.627986	0.106104	3657.34	46.5469
PI535912		Yes	1.63223	34.7216	2.43878	21.6668	3631	1433.91	6.1329	0.521801	0.115491	3149.29	35.3541
PI535913	S17	Yes	2.47996	43.4068	1.65477	20.7207	4494.68	1298.71	6.39495	0.478932	0.277379	3219.46	27.8782
PI535914	S22	Yes	2.16917	36.2755	1.65356	19.4042	3973.87	1340.27	6.01698	0.545183	0.0833267	3154.04	20.6677
PI535916	S37	Yes	2.32428	36.9483	1.78643	19.9536	3895.91	1453.03	4.65079	0.467569	0.0863932	3282.31	29.9139
PI535917	S51	Yes	2.20206	45.6938	2.9624	22.2489	4558.48	1299.36	7.56673	0.447802	0.18584	3406.63	33.1267
PI535919	S59A	Yes	2.22474	35.3441	1.55116	22.8533	4725.39	1294.4	5.94029	0.580549	0.251667	3469.8	27.1459
PI535921	S65	Yes	2.40257	50.715	3.43022	17.0296	3874.89	1180.17	4.10044	0.615963	0.106388	2906.13	24.058
PI535923	S90	Yes	2.03567	35.7427	4.20775	20.7983	4388.84	1300.96	4.53568	0.458426	0.0839209	3126.24	27.3593
PI535924	S97	Yes	2.1599	35.2319	2.17721	20.4277	3983.7	1411.31	7.45712	0.452694	0.265797	3267.43	29.4736
PI535925	S99	Yes	1.99327	31.1726	1.72572	29.3219	5299.44	1559.36	6.50033	0.582811	0.243549	4066.01	30.901
PI535926	S117	Yes	2.06038	47.3839	1.85721	24.3496	4639.94	1364.3	8.08876	0.45095	0.234468	3407.81	25.7976
PI535927	S125	Yes	2.03782	31.6065	1.64698	26.48	4235.19	1426.27	5.73127	0.500406	0.170855	3413.28	28.1635
PI537097	LH195	Yes	2.31869	38.9957	2.21154	22.6211	3938.77	1206.84	4.79025	0.453237	0.13105	3067.75	26.0281
PI537098		No	2.09592	34.7714	2.07834	22.1975	4616.23	1262.95	5.90766	0.37859	0.241568	2916.45	31.1537
PI537099	LH205	Yes	2.22179	24.4107	2.16	19.2974	4330.97	1105.3	4.12977	0.401784	0.109093	3002.27	26.786
PI537100		No	2.27654	41.2362	2.18794	24.8058	4286.05	1401.17	5.63719	0.50265	0.18852	3408.78	29.907
PI537101	LH211	No	2.33795	33.3002	1.67071	29.9554	4511.51	1422.45	6.92912	0.410493	0.520978	3579.09	33.5047
PI538007	LH127	Yes	2.34304	38.7901	1.57329	17.5072	4140.93	1263.05	5.56106	0.564138	0.0244585	2961.07	22.7636
PI538008	LH163	Yes	2.34367	31.6685	1.86974	27.8507	4947.33	1296.05	5.77819	0.442498	0.451078	3528.13	36.0401
PI538009	LH196	Yes	2.0093	22.6691	1.63299	16.7408	3916.54	1165.08	3.54169	0.401575	0.098869	2796.86	22.8926
PI538010	LH206	Yes	2.38382	36.8043	2.90041	20.9752	4973.5	1257.04	4.94344	0.399502	0.0565506	3465.19	27.7797
PI538011	LH220Ht	Yes	2.42978	26.2837	1.51666	18.6366	4433.74	1201.83	5.4854	0.390814	0.143995	2964.27	21.853
PI538231	SD59	Yes	2.00685	46.7678	4.86757	34.0104	4395.06	1456.4	9.59965	0.603916	0.570979	3581.84	40.4059
PI538235	SD57	Yes	2.42235	50.9832	2.5924	20.2669	4166.84	1182.09	5.90703	0.474875	0.187824	2930.45	27.1216
PI538237	SD63	Yes	2.08147	25.3238	1.58851	19.4329	4075.31	1235.81	4.8263	0.477105	0.270835	3216.82	25.3834
PI538238	SD65	Yes	1.73849	31.7142	2.30167	23.8982	4296.88	1202.77	3.8351	0.470282	0.160397	3359.64	27.2444
PI538239	SD69	Yes	2.32574	21.0424	2.0896	19.4765	4584.28	1435.42	6.29752	0.35821	0.131198	3508.13	30.4443
PI538242	SD106	Yes	2.06983	56.777	2.07546	27.4693	4504.91	1361.47	5.02201	0.402188	0.470318	3324.73	31.6499
PI538244	SD108	Yes	2.10909	31.1801	2.00449	25.6367	4345.91	1330.77	4.84249	0.418385	0.239408	3254.04	34.7842
PI539870	B92	Yes	2.02359	32.4769	2.15948	26.7713	4373.09	1520.23	7.70059	0.64451	0.113441	3662.04	34.4889
PI539871	B93	Yes	2.13449	10.3413	2.09357	22.8466	4243.56	1219.57	4.72496	0.544901	0.0992627	3063.72	25.2398
PI539872	B94	Yes	2.28976	55.1495	2.3822	21.2485	3854.94	1315.21	6.93517	0.642295	0.160214	3119.12	26.8031
PI539920	LH160	Yes	2.61376	43.1207	1.72876	24.0824	4623.39	1340.74	9.40945	0.644064	0.435154	3166.91	31.8582
PI539921	LH162	Yes	1.86279	42.1339	2.35778	21.7121	4525.14	1331.4	6.32144	0.44795	0.0907163	3209.07	30.5265
PI539922	LH190	Yes	2.44645	33.2064	1.67316	19.7252	3869.1	1127.16	4.42863	0.381583	0.0758136	2770.19	25.8156
PI539923	LH194	Yes	2.56476	41.9404	1.81493	22.3097	4497.08	1251.73	3.84216	0.503703	0.0244131	3170.61	26.8116
PI539924	LH202	Yes	1.93051	32.1195	1.91867	20.1361	4632.51	1193.02	4.24509	0.420898	0.16881	3141.23	26.9563
PI539925	LH191	Yes	2.20448	38.7615	1.87578	21.8124	4189.35	1266.22	5.42291	0.472757	0.122161	3108.25	27.2817
PI539926	LH192	Yes	2.20505	25.3635	1.52332	24.1373	4151.72	1337.43	5.0272	0.457136	0.112491	3023.39	28.9089
PI539927	LH193	Yes	2.04095	29.7	1.38955	22.5949	4296.81	1265.24	5.10247	0.446186	0.18549	2932.82	29.9817
PI539930	RS710	Yes	2.46269	36.7426	1.99327	21.05	4531.97	1360.33	5.57739	0.460215	0.407915	3474.63	26.5834
PI540743	Tzi6	Yes	2.20807	34.3586	1.99143	19.9107	4294.57	1305.52	3.69525	0.418785	0.0886824	3078.04	28.6176
PI540744	Tzi7	Yes	2.27524	61.1845	2.28752	23.7405	4575.41	1338.57	5.87283	0.420532	0.146609	3502.54	29.5786
PI540745	Tzi11	Yes	2.65196	55.2302	2.9385	21.8773	5078.57	1271.9	4.54717	0.5693	0.125049	3426.48	26.8332
PI540747	Tzi16	Yes	2.61553	39.2699	2.21052	23.0727	4681.66	1430.29	6.26891	0.388099	0.177899	3536.32	35.6359
PI540749	Tzi22	Yes	2.47539	41.3927	3.39268	23.1608	4408.1	1258.86	6.08857	0.508459	0.190087	3331.79	34.0738
PI542715	NP86	No	2.56473	62.5296	2.89328	29.6037	3568	1171.37	8.88406	0.522769	0.355238	2836.82	33.7847
PI542716	NP87	No	2.30007	38.1642	2.74073	20.9736	3901.37	1353.49	7.46707	0.581	0.166078	3069.67	35.1961
PI542776	HP62-02	No	2.1874	53.6049	3.12619	27.4856	4016.61	1572.13	11.283	0.478612	0.172199	3623.25	39.778
PI542777	HP72-11	No	2.35282	58.4601	2.12296	21.8469	3974.83	1362.74	7.54892	0.500682	0.382508	3148.73	35.884
PI542778	HP68-07	No	2.2942	67.4132	3.318	21.256	4185.5	1247.91	6.51821	0.49199	0.175282	3194.24	34.908
PI542941	SC84	Yes	1.99248	24.8772	2.11186	16.4235	4207.39	1408.8	4.96077	0.453825	0.0988599	3368.87	33.4012
PI542942	SC155	Yes	2.10629	47.838	2.15628	23.6529	3671.29	1288.89	5.50734	0.443141	0.183609	3026.01	29.0308
PI542944	SC301	Yes	2.33242	60.5972	2.94255	27.998	3195.09	1444.08	7.97715	0.511826	0.646993	3157.04	32.1037
PI542945		Yes	2.47484	40.4143	2.82273	27.7147	5083.36	1478.71	5.13634	0.462216	0.276948	3877.98	32.0377
PI542946	SC359	Yes	2.16769	36.5792	2.60223	22.0342	4822.75	1403.68	5.2904	0.435771	0.168218	3283.25	32.1447
PI542948	T204	Yes	2.05274	35.7861	2.07929	20.0676	3815.63	1146.7	5.02479	0.457605	0.194661	2820.87	22.2446
PI542950		No	1.81215	37.5958	1.89338	31.4651	4135.03	1437.07	5.84237	0.450686	0.122342	3478.69	30.8636
PI542952	T252	Yes	2.20104	35.6018	2.90019	18.0136	4037.28	1295	4.01991	0.524745	0.142979	3190.96	27.7514
PI542953	T264	Yes	1.90231	44.6726	2.69068	23.1474	3643.36	1167.29	8.05483	0.48106	0.232714	3021.86	29.6916
PI542954		No	2.05083	29.9135	1.50792	20.9349	3920.52	1248.54	5.64588	0.425521	0.0689557	3062	22.3869
PI542955	Va4	Yes	2.0646	37.5328	2.30647	25.4706	3913.8	1433.59	5.42542	0.429937	0.407739	3486.42	30.9285
PI542957	Va6	Yes	2.11044	30.5037	2.28428	26.4341	4264.02	1115.73	6.13118	0.43961	0.183795	2807.67	35.1541
PI542958	Va10	Yes	1.94486	17.4558	2.45967	23.0807	4216.41	1364.36	4.60364	0.431204	0.630888	3368.61	29.6713
PI542959	Va33	Yes	2.57335	28.1402	2.60349	25.0196	4440.39	1372.95	5.96636	0.563603	0.292622	3394.16	34.6729
PI543008	NC201	Yes	1.8794	13.5141	1.71223	21.7757	4334.97	1208.72	5.37659	0.53673	0.220083	3245.71	33.2392
PI543840	PHJ65	No	2.15138	61.7132	1.83656	21.7847	3926	1444.07	5.8144	0.540071	0.211439	2860.94	26.1464
PI543842	PHK56	No	2.17375	34.2711	1.76053	23.7226	4553.31	1227.29	4.42962	0.457023	0.341279	3081.21	23.4487
PI543843	PHN34	Yes	1.97464	31.0747	2.96302	25.2071	4648.41	1418.71	5.42944	0.400067	0.0507053	3519.3	38.1694
PI543846	PHP76	Yes	2.54665	30.2965	2.57244	30.0051	4959.71	1416.05	6.63828	0.514209	0.255202	3858.78	34.2037
PI543847	PHV07	Yes	2.43768	37.499	2.65035	23.1725	4491.89	1295.1	7.7317	0.531042	0.107638	3263.95	28.5489
PI543849	PHW51	Yes	2.1977	34.2853	2.63232	15.6706	4200.15	1197.37	7.17533	0.528076	0.301604	2926.6	26.4903
PI543850	PHW86	Yes	2.29679	47.3906	1.84366	27.4606	4532.59	1456.26	7.68617	0.451422	0.429743	3579.46	28.3525
PI543916	Mp339	Yes	2.37112	29.329	1.64756	23.2054	4555.81	1641.18	4.63555	0.409955	0.0891946	3622.69	22.8072
PI544065	BCC03	Yes	2.18527	34.4988	2.81177	23.7678	4110.14	1260.68	5.6954	0.553463	0.16017	2951.22	28.9511
PI546482	FBLA	Yes	1.96728	37.0168	2.48486	15.6594	4807.2	1347.68	5.57542	0.419727	0.239782	3696.05	25.3469
PI546483	6F629	Yes	2.28245	57.8138	3.66805	25.5236	4488.33	1452.01	9.14221	0.42875	0.0587274	3661.75	38.8218
PI546484	6M502A	Yes	2.27871	35.6483	2.37058	25.6461	4345.55	1334.64	7.71762	0.513557	0.156006	3278.97	32.1614
PI546485	NL001	Yes	2.07252	37.2196	2.01118	22.8779	4204.04	1277.95	5.21103	0.469583	0.184612	3286.29	29.7932
PI546494	ND265	Yes	2.93725	38.5394	1.64548	22.2149	3963.94	1370.71	5.30788	0.511162	0.227778	3224.05	28.3994
PI547086	LH128	Yes	2.32521	28.5808	2.29845	22.0125	4316.21	1017.48	3.14663	0.482662	0.151099	2913.37	27.1801
PI547087	LH181	Yes	1.95128	42.1224	1.57704	24.6354	3836.19	1205.61	5.06752	0.561948	0.180783	3098.93	29.2291
PI547088	LH208	Yes	2.33494	43.565	2.56362	23.6091	4509.56	1229.7	4.27885	0.445394	0.374002	3296.73	30.2508
PI547089	LH212Ht	Yes	2.44436	44.8252	1.46666	32.0134	4432.86	1413.66	6.35226	0.462712	0.403052	3375.2	34.2849
PI547090	LH213	Yes	2.35094	32.7057	1.51156	27.7993	4236.62	1365.05	6.28799	0.511177	0.318735	3229.51	33.6165
PI547107	Lp215D	Yes	2.12833	33.1294	2.81039	26.6697	5283.64	1356.28	7.81716	0.448639	0.319881	3721.07	31.2249
PI548783	T171	Yes	2.10179	37.0884	1.90072	25.4827	4314.02	1351.88	4.70077	0.51295	0.202806	3165.78	31.4452
PI548788	GT106	Yes	2.42089	44.0222	3.03549	25.4291	4245.38	1445.75	8.8266	0.535804	0.26439	3614.37	40.0455
PI548790	SC91	Yes	2.08282	46.9277	2.84242	27.0331	4469.26	1325.68	6.01888	0.424795	0.125439	3481.22	31.5008
PI548794	ND266	Yes	2.24724	48.9767	1.73347	22.4876	4130.74	1244.48	3.24929	0.563964	0.191028	3311.2	27.7155
PI548798	PHJ89	Yes	2.15017	31.5694	1.83184	32.0106	4917.82	1545.86	8.73208	0.43458	0.389103	3988.76	36.0762
PI548799	PHJ90	Yes	2.3344	31.989	1.90781	25.6707	4917.82	1240.86	5.18578	0.480839	0.272093	3229.86	29.3235
PI548801	PHM81	Yes	2.2158	33.3965	3.18172	24.788	4435.06	1243.38	5.29322	0.447569	0.409396	3372.94	27.8591
PI548802	PHN66	Yes	2.5076	43.5979	2.56869	27.806	4285.41	1354.59	8.10168	0.413227	0.245123	3182.88	31.1968
PI548805	PHR58	Yes	2.23084	24.5191	2.43669	22.9538	4167.19	1261.01	5.27588	0.493138	0.0919774	3014.69	23.8351
PI548808	PHW30	Yes	2.16777	43.7513	2.2233	26.0861	4639.5	1379.02	7.66137	0.588107	0.221192	3265.43	35.4574
PI548830	29MIBZ2	Yes	2.33828	44.2939	1.92786	27.5095	4628.64	1304.92	5.80196	0.459902	0.242796	3297.48	27.4481
PI548838		No	2.28938	33.473	2.54094	29.6037	4641.06	1544.95	7.51153	0.41626	0.266649	3452.79	35.8093
PI550440	B64	Yes	2.51161	35.183	1.98556	20.1717	4649.97	1368.4	6.9276	0.443669	0.35567	3496.24	25.9978
PI550441	Mo18W	Yes	2.04942	40.7771	3.95069	18.8445	4096.5	1189.21	5.98122	0.484519	0.303222	3003.25	32.6036
PI550442	Mo20W	Yes	2.09086	60.8938	2.78615	24.7573	4834.24	1502.39	9.59911	0.534203	0.321653	3541.23	28.7024
PI550443	B49	Yes	2.04852	23.1795	2.95742	21.7232	4721.5	1311.53	5.99917	0.405265	0.134693	3183.65	30.4264
PI550455	B67	Yes	2.46318	24.5314	1.97819	20.1513	4755.8	1383.25	4.49046	0.364244	0.459568	3322.23	27.3685
PI550456	B69	Yes	2.18821	24.5294	2.72489	23.5873	4838.6	1433.68	7.69527	0.472163	0.241382	3524.78	34.6229
PI550461	B14A	Yes	2.11162	20.7715	2.16271	19.1855	4967.81	1312.56	5.17047	0.385714	0.216713	3558.12	21.3547
PI550462	B59	Yes	2.19692	33.8188	2.40918	20.7868	4377.02	1340.99	5.7998	0.363953	0.300001	3473.31	21.7833
PI550463	B65	Yes	2.2752	30.4664	1.60586	24.8156	4860.75	1349.78	6.08523	0.447784	0.60787	3394.04	34.3081
PI550464	B66	Yes	1.82934	26.4586	1.6505	30.8724	4854.1	1400.33	9.44985	0.656569	0.210041	3333.14	41.8394
PI550465	B68	Yes	2.3481	25.7336	1.95086	16.1735	4942.16	1163.9	5.54472	0.418207	0.300341	3315.07	20.8355
PI550466	B70	Yes	2.4257	31.0442	2.00317	27.3331	4167.25	1326.11	8.13933	0.610057	0.164502	3504.35	31.2239
PI550467	B37	Yes	2.83424	45.4897	2.76949	23.6654	4236.75	1410.17	6.97398	0.475861	0.346703	3152.31	30.2113
PI550468	B45	Yes	1.9045	30.0924	2.66924	20.9813	3972.92	1342.54	4.38081	0.509275	0.288728	3399.19	27.7369
PI550469	B46	Yes	1.79364	46.6818	1.79384	20.4126	3578.46	1263.13	4.91435	0.48907	0.388512	3233.36	29.3169
PI550470	B54	Yes	2.10214	37.4087	2.23441	22.685	4209.75	1270.3	9.23744	0.549172	0.375253	2994.84	33.7608
PI550471	B56	Yes	2.27384	41.0005	2.68816	26.1148	4716.77	1494.94	9.74065	0.430919	0.719696	3335.79	37.2002
PI550472	B57	Yes	2.12578	33.6892	3.03941	26.6611	4759.19	1484.38	7.21952	0.647139	0.277864	3235.05	33.505
PI550473	B73	Yes	2.08964	15.4675	1.92951	23.0111	4403.3	1206.48	4.09129	0.425156	0.14746	2920.09	29.5725
PI550483	B76	Yes	2.24102	31.9186	2.67803	23.3658	4665.65	1343.46	5.18666	0.500054	0.214756	3295.79	29.2363
PI550489	ND245	Yes	2.0103	55.5147	2.87541	25.3949	4896.72	1424.55	10.8809	0.628569	0.182985	3696.46	35.3808
PI550490	ND246	Yes	2.05376	51.4382	2.84189	26.5284	4509.9	1419.63	10.062	0.56995	0.202851	3504.91	31.166
PI550491	ND301	Yes	2.11219	30.2587	1.62562	20.1675	4215.05	1327.71	5.87892	0.370089	0.522947	3263.42	29.6482
PI550492	GTS1	No	1.91156	32.3695	3.14806	19.3319	5523.49	1236.24	5.53188	0.475025	0.143547	3121.88	30.6709
PI550496	H102	Yes	2.67864	30.9075	2.76347	25.7106	5683.01	1330.82	5.40316	0.669881	0.260744	3820.7	38.4351
PI550497	H103	Yes	2.2001	65.3644	2.28884	19.3016	5825.01	1311.94	8.67239	0.515611	0.0979002	3640.29	28.1603
PI550503	ND247	Yes	2.17614	36.0299	2.37751	22.9653	4776.83	1179.38	5.03088	0.46148	0.411575	3106.01	28.9986
PI550504	ND248	Yes	2.59673	51.2234	2.20149	20.9707	3769.02	1412.49	6.18622	0.353231	0.333297	3494.46	31.9702
PI550514	T61	Yes	2.49934	31.3953	3.14222	19.7016	3855.52	1243.65	3.96887	0.440903	0.114574	2944.42	30.3923
PI550515	T101	No	2.37612	38.2542	1.84947	20.3787	4672.88	1224.38	7.12925	0.574483	0.527031	3178.01	24.2666
PI550516	T111	Yes	2.20849	45.3451	1.94879	19.0126	4325.2	1363.39	5.80688	0.474592	0.150384	3236.92	32.6674
PI550517	T115	Yes	2.15748	52.717	2.03856	21.3971	4986.97	1466.99	7.55951	0.478265	0.209479	3634.25	29.258
PI550518	T8	Yes	2.16171	28.5384	2.83344	19.6978	3934.56	1372.85	5.32611	0.477444	0.164715	3249.51	32.1491
PI550519	T220	Yes	2.59238	35.1376	2.42819	23.7974	4191.55	1295.04	3.62547	0.444592	0.100466	2833.86	28.2657
PI550520	T224	Yes	2.08957	47.8166	2.63994	22.1325	4796.41	1415.65	7.56929	0.494758	0.232818	3639.86	28.3598
PI550521	T226	Yes	1.83356	20.1322	1.31068	21.1091	3996.1	1171.86	3.97296	0.499999	0.266281	2905.63	27.1327
PI550522	T232	Yes	2.0956	53.3002	2.2208	22.7305	3922.76	1308.5	7.0866	0.45568	0.153996	3149.83	30.8191
PI550526	H110	Yes	2.05845	38.2434	1.96812	19.7599	4812.84	1293.68	5.73281	0.473611	0.266672	3641.44	22.3409
PI550527	H111	Yes	2.14778	40.7996	2.07812	24.3051	4441.33	1562.75	7.12295	0.5123	0.394323	3624.87	29.6946
PI550530	ND249	Yes	2.36882	44.8325	2.2639	27.3989	5175.01	1444.53	6.85803	0.443524	0.25358	3639.82	29.469
PI550531	ND250	Yes	1.94992	46.0464	2.65749	22.5957	3537.83	1424.99	7.40067	0.419446	0.188248	3300.65	31.2123
PI550532	ND251	Yes	2.23518	45.9417	1.96272	20.5483	4146.94	1286.21	6.25478	0.482821	0.201914	3131.31	27.6092
PI550534	Mp701	Yes	2.22642	26.0145	1.19493	24.9226	4846.08	1454.44	5.38164	0.499464	0.307938	3340.02	28.676
PI550541	ND253	Yes	2.678	52.6787	1.74809	26.2097	4067.33	1316.37	6.72472	0.558215	0.197171	3182.3	37.6012
PI550542	ND254	Yes	2.30766	40.8682	1.73403	21.9016	4452.04	1400.65	6.68633	0.460635	0.211845	3244.47	28.7774
PI550546	Mp705	Yes	2.00429	46.192	2.62574	32.7479	4815.55	1399.21	5.35373	0.601859	0.378806	3287	38.1387
PI550547	Mp706	Yes	2.17758	57.6317	2.53029	33.0451	4830.93	1438.68	5.73504	0.595624	0.321441	3273.85	41.8871
PI550552	ND304W	Yes	2.20616	30.2376	3.55921	28.2916	4774.6	1400.85	5.44167	0.620354	0.152488	3818.02	31.4918
PI550553	ND101	Yes	2.36104	40.5438	2.68572	27.0501	3988.36	1293.84	6.42969	0.43528	0.736387	3244.99	34.7491
PI550554	ND256	Yes	1.85037	29.2417	2.5768	31.1548	4722.58	1441.63	7.72808	0.504272	0.150729	3741.82	35.4779
PI550555	NC250	Yes	2.6476	48.158	1.98964	20.3918	3890.68	1250.33	7.00036	0.41978	0.226974	3017.78	30.8856
PI550556	B88	Yes	2.29558	34.1624	1.84685	22.0713	4865.73	1331.34	5.9239	0.485419	0.312265	3304.17	27.9784
PI550558	DE811	Yes	2.70528	28.8156	1.99075	19.6256	4559.72	1379.41	5.68172	0.445231	0.491828	3680.12	27.2656
PI550559	T163	Yes	2.12624	46.1597	1.43089	20.7886	4182.35	1315.89	4.27088	0.423802	0.266424	3289.46	27.066
PI550561	ND257	Yes	2.15936	46.9478	1.96315	27.4995	4634.51	1250.88	7.03995	0.461365	0.26199	3150.75	34.0246
PI550565	N190	Yes	2.31053	19.0792	1.87896	22.1608	4336.32	1328.77	4.81711	0.473042	0.211054	3464.84	26.1877
PI550566	N192	Yes	2.17317	33.2854	1.62293	22.65	5122.84	1507.69	7.03953	0.465114	0.2761	3799.78	31.3326
PI550567	N193	Yes	1.73077	32.119	1.628	21.111	4063.19	1087.77	3.7037	0.441476	0.128958	2642.74	25.1141
PI550568	N194	Yes	2.15638	34.7896	1.73137	21.9947	3929.65	1105.06	2.95191	0.465091	0.16731	2645.98	25.6759
PI550571	ND259	Yes	2.10789	32.1092	3.57791	22.3455	4003.86	1289.03	6.15361	0.546595	0.02386	3123.49	29.0664
PI550573	ND260	Yes	2.22496	48.8166	3.13985	25.7687	4722.62	1508.08	5.39117	0.492286	0.286753	3594.78	34.4988
PI550574	GA203	Yes	2.26548	41.6851	1.14621	26.7846	4009.41	1272.08	4.42724	0.521075	0.224239	3122.75	36.5139
PI550695	L155	Yes	2.5357	36.1283	1.86829	25.7656	4791.04	1379.62	5.90544	0.438532	0.502367	3470.75	25.374
PI550901	88091	Yes	1.92676	45.3508	2.11239	24.5537	5288.77	1271.04	5.93463	0.459435	0.144148	3498.27	26.2337
PI550908	89260	Yes	2.28924	55.9854	3.50546	32.668	4265.69	1247.05	5.05201	0.335909	0.197652	3096.34	30.3034
PI550909	89291	Yes	2.25967	42.8084	1.26397	22.3221	4870.58	1372.01	6.65671	0.484584	0.0474278	3616.24	27.7307
PI550911	89302	Yes	2.19056	33.9009	1.89918	23.6072	4826.24	1315.81	5.90454	0.416844	0.367856	3321.23	27.4399
PI550917	88094	Yes	2.55984	54.2189	2.51653	32.9974	6325.05	1670.42	9.3269	0.506095	0.111371	4304.35	38.2604
PI550918	88069	Yes	2.44206	32.8033	2.3161	23.6489	4898.48	1351.91	4.46273	0.472133	0.200619	3172.43	27.7992
PI550919	88030	Yes	1.91496	56.4445	1.64867	18.5513	4205.51	1141.3	5.12802	0.427639	0.239852	2992.31	28.0024
PI550924	Z28	Yes	2.26616	36.5414	3.10116	22.6094	4898.48	1428.16	5.26766	0.567508	0.413696	3627.77	28.9753
PI552815	LH215	Yes	2.48524	51.6706	3.126	24.3588	5096.89	1314.16	5.7436	0.581196	0.181563	3500.42	29.8135
PI553055	OC2	Yes	2.05517	77.2695	2.01161	24.5662	3993.15	1209.28	8.1704	0.635359	0.346529	3289.86	43.5307
PI553056	OC3	Yes	1.97079	46.6275	3.02382	25.4682	4720.49	1410.47	5.47187	0.493254	0.385446	3354.25	33.9119
PI553057	OC4	Yes	2.2336	56.508	2.58212	27.092	4664.69	1412.99	6.198	0.466858	0.126407	3372.45	33.5648
PI553058	OC5	No	2.23074	53.3939	3.08188	19.6584	3856.15	1391.35	9.98839	0.485269	0.25599	3224.17	42.1556
PI553059	OC6	Yes		88.214	2.57832	26.3468	4858.18	1574.92	10.1781	0.49375	0.44182	3467.17	39.6536
PI553060	OC7	No	2.3887	37.8042	2.79902	22.7085	3761.25	1117.58	6.86294	0.454965	0.428279	2691.04	32.2345
PI553062	OC9	No	1.83527	57.9695	2.10978	25.1838	3602.77	1207.19	7.92046	0.537142	0.220807	2974.01	24.3651
PI553063	OC10	Yes	2.31725	74.949	2.55049	24.5517	3824.42	1234.94	6.53167	0.4018	0.538056	3139.23	43.6292
PI554612	LH209	Yes	2.21741	34.4641	1.67081	23.4607	4736.59	1339.31	5.40357	0.479139	0.140098	3330.52	29.8012
PI554616	3IBZ2	Yes	2.11984	36.2679	3.86327	24.5794	4637.34	1400.97	8.1176	0.438122	0.313575	3676.5	28.3258
PI555462		No	1.96625	27.0965	2.14855	24.3271	4240.18	1116.65	4.47146	0.481216	0.0756363	2949.43	26.6527
PI555650	LIBC4	Yes	2.28587	35.4157	1.67305	25.8814	4534.31	1354.56	6.61103	0.444756	0.186428	3279.92	31.554
PI555651	83IBI3	Yes	2.28253	42.7214	1.71509	27.9468	4812.48	1484.13	7.06125	0.45254	0.471815	3578.73	30.9719
PI555659		No	2.19166	27.8508	1.83382	24.2832	4624.91	1329.41	6.73632	0.45261	0.305606	3045.08	31.1408
PI555660	LH214	Yes	2.03307	32.4966	1.33547	23.627	3873.9	1319.09	5.60158	0.525411	0.177937	2990.92	31.3199
PI557556		No	2.50419	34.244	2.08323	25.8705	4487.83	1332.68	5.83504	0.48792	0.233744	3382.55	32.0191
PI557557		No	2.48284	49.1315	2.48384	26.9954	4839.62	1299.3	9.68432	0.416045	0.34229	3322.35	35.6239
PI557563		No	1.93486	50.0601	2.09018	21.7702	4773.57	1335.63	5.88683	0.620481	0.165879	3442.36	30.1037
PI557566		No	2.63613	37.2199	2.63332	22.6031	4175.22	1221.71	5.48593	0.508028	0.252207	3109.69	29.3502
PI557569		No	2.24938	30.3344	2.92097	22.9906	4720.24	1077.08	5.33361	0.468939	0.0372773	2905.36	26.949
PI558516	Mo7	Yes	2.18925	42.1651	1.92328	22.5727	4159.85	1412.46	7.10954	0.460347	0.426139	3479.91	33.7046
PI558517	Mo10	Yes	2.22357	37.0206	2.29987	24.7874	4163.82	1455.35	6.01263	0.490497	0.101239	3468.16	32.6803
PI558518	Mo15W	Yes	1.62998	50.493	1.66449	23.5227	3570.39	1435.13	8.52309	0.413477	0.0777842	3007.31	24.9187
PI558520	MO1W	Yes	2.34131	34.9189	1.56851	32.0831	5435.1	1323.79	4.5631	0.460157	0.456166	3320.88	33.2611
PI558521	Mo2RF	Yes	2.11963	46.052	2.73724	23.2108	4343.32	1326.76	5.56486	0.475487	0.527889	3346.85	28.55
PI558522	Mo3	Yes	2.08949	41.0136	3.10902	21.4254	3629.75	1330.03	6.94018	0.539658	0.266623	2850.93	35.2684
PI558523	Mo5	Yes	2.11079	27.1653	2.04574	25.4444	4148.44	1374.88	5.60626	0.60427	0.375362	3357.61	30.6037
PI558524	Mo6	Yes	2.23526	24.2727	2.65292	28.7204	4574.89	1393.53	6.49972	0.458679	0.269685	3683.46	28.656
PI558525	Mo8W	Yes	2.13204	35.3275	2.15423	23.6863	4279.47	1413.85	5.9192	0.47971	0.108378	3286.48	28.3665
PI558526	Mo9W	Yes	2.07952	31.3236	2.16119	23.4231	4261.97	1509.9	6.579	0.478763	0.0807317	3275.34	28.9711
PI558527	Mo11	Yes	2.12361	26.0933	2.15874	24.6963	4863.61	1221.61	3.96901	0.355513	0.314338	3173.23	32.3361
PI558528	Mo12	Yes	2.10976	33.2928	1.72522	21.0639	4332.61	1262.48	5.20486	0.400295	0.209752	3010.1	28.3276
PI558529	Mo13	Yes	1.75469	33.129	2.39434	21.8523	3835	1351.63	4.98648	0.475889	0.253224	3092.44	32.3585
PI558530	Mo14W	Yes	2.71516	52.6524	3.24568	24.6631	4842.76	1248.94	4.80022	0.56359	0.421541	3094.04	32.4244
PI558531	Mo16W	Yes	2.03716	18.0541	1.99321	23.8856	4312.84	1385.71	6.03768	0.407645	0.049653	3322.04	23.5647
PI558532	Mo17	Yes	2.27789	22.9276	2.71715	25.2023	4500.16	1302.18	5.8259	0.538095	0.0669464	3344.09	28.7418
PI558533	Mo21R	Yes	2.28602	31.3047	2.06575	25.3148	5057.89	1338.02	4.94943	0.46431	0.250371	3355.22	32.708
PI558534	Mo22	Yes	2.17615	46.5787	2.90255	21.3849	4344.53	1252.37	3.71369	0.499374	0.159693	2878.61	27.682
PI559375	LH222	Yes	2.37147	32.5641	1.58819	25.2637	4960.31	1477.42	7.12661	0.44475	0.247339	3661.75	31.3461
PI559380	ICI193	Yes	2.08767	37.3672	2.24468	24.1333	5043.8	1350.97	6.95579	0.388091	0.205734	3480.7	28.0494
PI559381	ICI441	Yes	2.33067	34.0075	1.85698	22.2383	4394.62	1231.48	4.60288	0.44402	0.150597	3106.49	30.6657
PI559382	ICI740	Yes	2.25651	32.4856	1.73947	25.7063	4484.99	1295.78	6.1175	0.478532	0.152782	3218.23	31.5727
PI559383	ICI893	Yes	2.0951	34.8815	2.26397	26.7169	4466.37	1434.7	6.26576	0.411509	0.24769	3564.05	27.0976
PI559384		No	2.44956	42.773	3.23126	26.2942	4725.1	1423.7	7.34856	0.458605	0.474263	3475.3	36.0896
PI559916	CS405	Yes	1.87582	30.8885	2.32391	24.6226	4032.99	1296.41	8.45139	0.478403	0.0806449	3233.95	30.5927
PI559917	MQ305	Yes	2.49937	29.0442	2.13784	23.677	4830.92	1355.75	5.18496	0.412508	0.205364	3499.86	26.5472
PI559918	NQ508	Yes	2.33544	32.4375	1.55292	24.4874	4665.65	1267.21	5.45007	0.445201	0.244738	3295.79	26.5435
PI559919	OQ101	Yes	2.23214	41.403	2.79573	23.7323	4426.36	1416.75	10.4698	0.463145	0.212774	3348.08	34.249
PI559920	OQ403	Yes	2.48166	31.8514	2.31741	28.927	5006.3	1613.81	7.04161	0.469085	0.266507	3684.67	34.5907
PI559921	OS602	Yes	2.60863	27.178	2.50057	32.996	4897.15	1554.41	7.35838	0.486269	0.312783	3786.3	31.9817
PI559936		No	2.30378	29.8666	1.89725	22.5311	4492.98	1470.61	5.88199	0.524659	0.499937	3429.84	28.9436
PI559938		No	2.20656	37.5224	2.19982	22.5888	4648.12	1444.19	8.97774	0.4251	0.102326	3634.61	36.7636
PI559939		No	2.58884	35.1844	1.92678	20.9201	3832.72	1207.79	4.24325	0.476587	0.435344	3036.49	28.2311
PI559940		No	2.44324	48.4077	1.69686	29.6333	4667.44	1334.26	7.15556	0.464269	0.256868	3377.08	33.3873
PI559941		No	2.00921	34.0056	1.77605	17.2819	3988.05	1055.34	3.0678	0.420787	0.245988	2694.2	26.0262
PI559942		No	2.23946	24.6953	2.24187	27.8785	4958.36	1401.11	6.54536	0.468229	0.419227	3546.72	33.139
PI559944	PHP85	Yes	2.26836	34.6913	1.56086	20.7408	4100.06	1300.24	5.57412	0.519932	0.184343	3125.34	27.4305
PI559945	PHPR5	Yes	2.56791	22.0385	1.7226	20.5496	4153.51	1410.63	5.21038	0.48331	0.26247	3261.84	30.9449
PI559946	PHR30	Yes	2.52796	43.1665	1.67207	25.2243	4521.34	1481.29	9.39439	0.427563	0.467837	3571.93	30.3993
PI559949	PHT69	Yes	2.29402	37.8148	1.40565	22.5598	4279.18	1276.14	5.91656	0.523926	0.187295	3274.36	27.19
PI559950		No	2.14394	44.7442	5.1214	29.7373	4427.45	1447.35	7.95779	0.462598	0.207012	3584.14	33.1473
PI559951		No	2.18018	47.7953	1.40376	23.2458	4371.35	1372.12	7.27943	0.399348	0.137879	3301.01	30.8132
PI559952	PHV53	Yes	2.2125	31.5406	2.40104	21.5302	3468.08	1396.06	4.5214	0.492514	0.214738	3039.11	27.0533
PI559953	PHVA9	Yes	2.24346	37.1722	1.69297	21.7187	4294.94	1358.89	8.17924	0.46938	0.138998	3492.85	33.7799
PI559954	PHWG5	Yes	2.1207	25.9074	2.83104	22.1243	4725.66	1358.17	5.73207	0.537481	0.202832	3447.74	23.8233
PI560074	Pa759	Yes	2.31079	26.5502	2.19774	21.299	5568.9	1587.77	8.3108	0.428589	0.278986	4102.39	26.4726
PI560075	Pa760	Yes	2.25257	32.6756	1.92595	21.871	5047.36	1484.79	8.10462	0.432111	0.289271	3966.11	28.9721
PI560081	Pa778	Yes	2.24772	24.4019	2.91868	28.0203	4151.8	1326.07	7.34041	0.447642	0.232667	3305.77	28.9518
PI560082	Pa860	Yes	2.12414	31.9179	1.17363	26.3929	3977.9	1317.88	7.26477	0.531993	0.562481	3079.1	37.1381
PI560316	CS608	Yes	2.08477	35.3231	2.84712	20.8664	4438.78	1336.53	7.02463	0.48674	0.178716	3250.42	28.5678
PI560317		No	2.56613	32.6495	1.56477	25.1797	4373.03	1260.71	5.88709	0.450869	0.226688	3114.08	31.3959
PI561515	AR202	Yes	2.35203	47.9059	2.37853	22.1715	5125.32	1358.35	6.46461	0.439366	0.351325	3507	28.8454
PI561516	AR204	Yes	2.2301	30.8325	1.79306	23.8185	3720.49	1339	5.92718	0.440444	0.1065	3149.83	30.0135
PI561517	AR206	Yes	1.97765	53.8302	3.11709	25.377	3799.64	1213.61	4.42717	0.54737	0.10509	3060.53	18.6098
PI561522	AR228	Yes	2.37042	37.6834	2.65012	23.1206	4462.32	1306.69	6.18705	0.48046	0.186541	3142.8	25.9352
PI561523	AR234	Yes	2.36957	53.391	1.72734	18.2016	3990.04	1279.7	4.73362	0.510609	0.246312	2957.25	22.6499
PI561525	AR242	Yes	2.39243	45.8539	1.72491	18.7519	3544.52	1253.33	5.17001	0.478933	0.266222	2850.97	23.9771
PI561526	AR250	Yes	1.9919	41.305	2.21245	20.5616	4064.98	1173.11	6.84405	0.436387	0.149564	3109.75	27.9709
PI561527	AR254	Yes	2.43206	17.2676	2.15469	23.6585	3432.65	1360.48	5.615	0.442318	0.481621	2974.6	31.3877
PI561529	AR266	Yes	2.30176	32.2371	2.19185	24.5604	5332.34	1417.35	5.71941	0.454651	0.287898	3997.31	30.6065
PI561531	AR270	Yes	2.21498	52.371	2.77543	20.7237	4241.82	1602.91	7.40784	0.462028	0.216072	3366.9	32.1453
PI561532	AR272	Yes	2.22872	44.9953	3.32602	22.2436	5556.29	1228.78	4.56509	0.455073	0.294162	3128.81	31.9874
PI561533	AR276	Yes	2.00128	22.4221	2.03929	22.0737	3806.35	1195.21	5.04295	0.381585	0.0937419	2601.73	28.9403
PI561537	AR400	Yes	2.28879	34.4756	3.45407	20.4316	4408.25	1364.22	5.38997	0.377419	0.157241	3143.15	32.5227
PI561565	B95	Yes	2.04194	22.7469	2.81093	24.1875	3584.63	1260.18	6.00354	0.494831	0.128822	2950.02	29.5317
PI561604	90176	Yes	2.0572	46.7001	1.89225	20.8549	4359.07	1417.99	6.98486	0.55722	0.093741	3425.4	27.8042
PI561613	90301	Yes	1.95109	42.9962	3.03025	27.5008	4721.78	1492.43	7.93289	0.401882	0.137201	3843.25	30.4759
PI561614	90313	Yes	2.05884	40.3846	2.15005	22.5611	4710.35	1303.81	5.62666	0.41305	0.18076	3361.9	28.1135
PI561694	NYRD4058	Yes	2.58124	28.1242	2.85364	27.0661	4535.77	1407.42	5.29758	0.559419	0.183735	3380.52	36.7472
PI562380		No	2.24797	40.4285	2.69554	22.0147	4687.26	1372.04	5.82499	0.457026	0.24417	3825.35	27.9626
PI562381		No	2.2616	43.2663	2.30563	24.7945	4542.78	1392.63	6.20905	0.435078	0.18526	3426.95	26.7266
PI564682	B97	Yes	2.14201	43.3312	2.22889	23.3952	3684.65	1301.77	5.43977	0.512891	0.19153	2807.1	37.9973
PI564697		No	2.25792	15.7776	2.47853	19.5967	4433.34	1238.84	4.89219	0.501639	0.241321	2776.1	27.9172
PI564716	AR200	Yes	2.16209	33.1951	2.37891	24.5736	4600.21	1313.35	5.80329	0.394605	0.291164	3530.44	29.0953
PI564852	B101	Yes	2.15908	18.1446	2.6842	23.3407	4293.05	1228.86	3.936	0.416089	0.180875	3016.27	28.3095
PI565099		No	2.24978	23.9802	1.35861	22.2053	4383.01	1400.32	5.2217	0.45251	0.387067	3126.04	26.1243
PI565100		No	2.57224	30.0687	1.72271	24.7999	4490.06	1283.66	5.60216	0.441911	0.371682	3095.67	28.0687
PI565105		No	2.19404	37.8216	2.05407	17.9084	3799.11	1208.46	8.08852	0.50121	0.202432	3041.21	25.2058
PI565107		No	2.27988	51.8469	2.02076	25.6649	4580.69	1362.86	7.02286	0.440182	0.304965	3432.24	28.6571
PI565111		No	2.46545	28.9967	2.31649	24.0822	4661.86	1249.18	5.07903	0.419706	0.378291	3250.15	31.414
PI565112		No	2.32018	39.8639	2.02868	26.3093	4243.74	1251.17	6.71774	0.483398	0.132257	3171.15	33.3461
PI566938		No	2.40085	41.5852	2.36814	22.9742	4962.04	1232.83	5.84672	0.466347	0.103979	3095.67	32.0509
PI567792	A684su	No	1.87765	50.6814	3.32189	28.326	4868.74	1515.18	6.86408	0.505647	0.267131	3592.34	34.7806
PI567793	A685su	No	2.10558	67.6742	3.45178	24.6779	5145.53	1585.97	7.55349	0.591122	0.194412	3754.53	36.3175
PI567794	A686su	No	2.45026	55.4483	3.08736	27.3571	5257.45	1364.58	7.12219	0.468876	0.310298	3392	38.3427
PI568158	N199	Yes	2.29802	39.2246	2.03334	24.3187	4542.74	1340.08	7.25302	0.542099	0.190679	3400.13	34.7598
PI568159	N200	Yes	2.41093	27.1717	2.34675	21.9459	5246.85	1329.39	7.34357	0.589021	0.136738	3498.25	40.9864
PI568160	N201	Yes	2.41773	22.0157	1.78675	21.6488	4339.42	1100.98	4.39793	0.458991	0.173097	2927.87	30.1784
PI572413	Oh599	Yes	2.16159	39.2405	1.52434	23.8936	3810.94	1296.34	4.30224	0.488418	0.337465	3128.63	30.2471
PI573098	Oh603	Yes	2.37839	38.165	2.82077	26.5096	4238.62	1392	6.3802	0.482307	0.374746	3485.57	27.2244
PI583350	Mo45	Yes	2.19491	41.9329	1.55827	21.6916	4324.77	1214.03	5.59522	0.495714	0.267224	3175.67	26.8515
PI583351	Mo46	No	2.03178	37.68	2.47797	20.4363	3946.17	1283.72	5.35307	0.432644	0.239209	3020.19	26.0195
PI583352	Mo47	Yes	2.41952	34.6356	2.67879	19.3297	4319.49	1369.7	3.43767	0.404613	0.305721	3401.75	25.1409
PI583774	ML606	Yes	2.19705	55.5398	3.22118	25.4515	4438.81	1414.94	6.58411	0.528057	0.119976	3340.72	33.6788
PI583846	H126W	Yes	2.0548	37.5393	2.4317	21.7494	4313.09	1162.74	5.98765	0.626775	0.036011	3141.31	22.9329
PI583847	H125	Yes	2.24577	40.9871	1.78602	21.9621	4294.86	1137.99	4.78154	0.387334	0.100956	2902.96	27.8979
PI584528	B99	Yes	2.01338	33.2243	3.19279	29.3987	3719.79	1359.39	6.61159	0.538245	0.100907	2732.06	30.052
PI584529	B100	Yes	2.14626	30.2974	1.93737	19.0349	4250.91	1321.62	5.24936	0.552451	0.0118508	3293.54	25.2862
PI587124	CM105	Yes	2.23473	26.4553	1.94744	19.8968	4599.39	1305.38	5.6984	0.5401	0.364405	3647.73	25.6952
PI587125	CO109	Yes	2.27077	36.448	2.96039	19.8502	4370.88	1441.21	6.50849	0.482237	0.443486	3340.25	33.0089
PI587126	C13	No	2.684	39.8832	3.09211	32.5689	5221.05	1378.43	7.11341	0.60849	0.145644	3551.33
PI587127	H105W	Yes	2.25937	49.6862	2.10248	23.1537	4258.88	1339.91	6.15113	0.536191	0.179043	3435.31	28.9754
PI587128	H84	Yes	2.31801	30.2749	2.13239	21.3233	3958.56	1305.78	4.20249	0.374544	0.184331	3124.17	28.6544
PI587129	H99	Yes	2.17858	24.6363	2.64525	21.5804	4587.28	1346.61	5.92383	0.494905	0.0978838	3321.36	28.8307
PI587130	4722	No	2.25603	44.0371	1.57501	22.7299	4163.3	1330.63	7.78772	0.512487	0.280444	2974.9	34.0014
PI587131	HP301	No	2.52375	46.1831	1.63872	20.0079	3731.74	1307	9.05219	0.405942	0.0938074	2806.2	33.8209
PI587132	Sg1533	No	2.18932	53.7007	3.08691	29.2398	3911.36	1404.48	11.0817	0.448088	0.19485	3205.13	41.2261
PI587133	P39	No	1.99678	52.2906	2.39226	21.3204	4070.74	1166.06	6.29452	0.47227	0.22214	2798.49	30.3243
PI587134	IA2132	No	2.13641	28.861	3.79159	26.9719	5111.73	1390.69	5.27884	0.464272	0.409094	3565.06	40.8527
PI587135	Ia5125	No	2.2823	53.0467	3.56196	25.7372	4825.72	1329.89	5.67638	0.44872	0.477017	3431.81	33.919
PI587136	KY228	Yes	1.97238	21.2523	2.02442	24.6446	4392.48	1342.71	5.20823	0.382534	0.11475	3276.8	24.4585
PI587137		Yes	2.48829	63.4157	3.62708	22.6222	4675.61	1362.4	9.38334	0.518131	0.117336	3485.13	30.9759
PI587138	A554	Yes	2.44217	32.343	2.93992	31.0708	4666.96	1358.64	5.31482	0.550849	0.269332	3499.93	36.6149
PI587139	A619	Yes	2.06428	37.381	2.18811	23.6169	3892.78	1210.43	5.06046	0.500829	0.348775	2535.05	31.7796
PI587140	A632	Yes	1.96467	17.0861	1.58737	18.3392	3993.85	1381.37	6.56725	0.388698	0.254219	3408.77	24.4887
PI587141	A654	Yes	2.19759	36.2641	2.51241	18.8322	3942.13	1111.62	4.2075	0.461049	0.150103	2876.14	28.3568
PI587142	A679	Yes	2.08347	30.0649	1.63257	23.2543	4358.65	1305.6	4.96209	0.497532	0.202208	3131.39	28.4986
PI587143	A682	Yes	2.61754	35.8661	2.45411	21.26	4171.12	1215.34	5.82319	0.523406	0.103099	2904.4	26.7811
PI587144	Mo24W	Yes	2.36924	33.4926	2.50019	19.2895	4191.44	1240.71	4.43724	0.533202	0.13457	3370.15	30.704
PI587145	NC268	Yes	1.80999	54.686	2.52167	26.8775	4610.32	1278.06	4.93439	0.478036	0.320973	3168.95	29.6773
PI587146	Oh7	Yes	1.78549	22.2159	1.21738	19.3075	4227.22	1245.96	5.07797	0.38545	0.189456	2992.66	23.4298
PI587147	Pa91	Yes	2.15987	73.4777	3.36996	27.1836	4591.17	1592.15	9.64981	0.582137	0.196928	3716.13	45.2896
PI587148	CI66	Yes	2.17032	30.846	2.86533	32.8255	4860.6	1655.46	7.32848	0.575564	0.328097	3973.83	36.5716
PI587149	Va26	Yes	1.87799	20.9489	1.81217	21.4965	4348.64	1228.92	4.99568	0.517503	0.111932	3269.66	28.6109
PI587150	Va35	Yes	2.23	40.3434	3.27419	23.0225	4119.06	1324.36	5.1466	0.591502	0.234719	3292.86	29.6222
PI587151		Yes	1.96932	41.3261	3.38047	22.7118	3728.92	1396.16	4.00875	0.518814	0.277471	3157.76	29.5222
PI587152	W64A	Yes	2.11246	38.7171	2.16989	28.152	3776.82	1350.43	7.7966	0.293299	0.185177	3205.73	22.4173
PI587153	W117	Yes	2.14603	38.6192	2.04739	22.2242	3824.05	1311.57	6.17312	0.336108	0.217624	3103.45	34.2442
PI587154		Yes	2.24476	30.9839	2.80708	27.6259	4219.32	1349.61	4.40797	0.614858	0.177787	3187.86	39.2291
PI587155	W182BN	Yes	2.71153	50.1036	2.99902	21.5041	4167.11	1388.96	6.87977	0.358648	0.505918	3400.74	39.1888
PI591014	BO385Y	Yes	2.41012	67.1997	2.15857	18.6528	6671.02	1297.69	5.92913	0.761801	0.105368	3484.39	29.2803
PI591015	BO394Y	No	2.14244	70.3201	2.20802	18.1065	5580.84	1184.48	4.72012	0.489468	0.123084	3123.89	29.3639
PI591017	KO679Y	Yes	2.5825	48.3453	1.73768	24.5368	4114.26	1299.67	6.34187	0.387993	0.277474	2885.95	27.1766
PI592733	R228	Yes	2.46506	23.202	1.94082	26.774	5006.97	1359.19	5.27968	0.476552	0.107663	3444.04	31.3556
PI592734	R229	Yes	1.76921	25.752	1.66995	23.358	4517.37	1176.49	5.13591	0.429605	0.126927	2982.75	31.9131
PI592735	R230	Yes	2.17281	32.6453	1.80215	27.0114	4957.62	1373.09	5.68608	0.472586	0.167706	3412.56	28.1331
PI592741	N801w	Yes	1.87805	38.5982	1.63071	21.3894	4136.54	1192.07	4.545	0.523178	0.216091	3021.01	27.4203
PI593007	Hi25	Yes	2.3089	36.1627	1.68149	22.5593	4885.21	1445.62	7.85261	0.398203	0.214491	3855.76	28.3868
PI593008	Hi26	Yes	1.8665	17.546	3.06556	22.8411	4583.7	1341.66	5.72205	0.44806	0.411474	3381.09	32.0946
PI593009	Hi27	Yes	2.21639	46.3742	1.33385	20.8616	4082.12	1337.16	8.36331	0.509554	0.0767744	3243.73	31.5604
PI593010	Hi28	Yes	1.90569	41.5435	1.48256	26.6867	4045.52	1399.95	6.40013	0.567955	0.18088	3450.76	35.9712
PI593013	Hi31	Yes	2.1799	14.0488	2.07655	19.9294	5107.64	1300.75	6.40531	0.408351	0.312381	3594.73	28.3207
PI593014	Hi33	Yes	2.17651	34.0267	2.31226	19.9196	4244.96	1300.77	6.04366	0.50622	0.422216	3126.07	28.2778
PI593015	Hi34	Yes	2.09458	60.4224	2.09608	26.8987	4814.6	1214.73	5.55314	0.420282	0.274804	3196.82	31.4358
PI593017	Hi39	Yes	1.96349	22.6528	1.94476	25.092	4403.35	1347.69	5.59109	0.526384	0.107895	3200.93	25.9861
PI593019	Hi41	Yes	2.15623	32.3364	2.8794	24.6589	4253.11	1377.95	7.77174	0.490941	0.22846	3374.11	33.2933
PI594045	B102	Yes	2.28113	37.3054	2.30101	22.5497	4674.97	1402.51	6.92694	0.53425	0.137407	3489.33	28.4788
PI594046	B103	Yes	2.58144	30.7155	1.77227	22.6117	4218.88	1228.22	5.18519	0.508134	0.354368	2925.88	27.7321
PI594047	B104	Yes	1.88601	29.8022	1.96376	20.4376	4147.84	1197.44	6.12952	0.454765	0.235693	2847.84	27.079
PI594048	B105	Yes	2.3307	38.9636	1.27652	18.4574	3968.62	1434.87	6.73557	0.5536	0.229348	3255.02	29.736
PI594049	B106	Yes	2.30455	52.3553	4.26967	23.0212	4763.46	1396.78	6.19204	0.499614	0.101522	3942.81	31.6029
PI594050	N501	Yes	2.4602	53.6453	3.80887	17.0621	4477.38	1240.01	6.60071	0.60498	0.564999	3267.56	25.6454
PI594051	N502	Yes	2.17988	20.7158	2.21162	20.6754	4352.49	1196.04	4.87646	0.537403	0.295247	3075.53	24.0305
PI594052	N503	Yes	2.40772	26.1178	2.38655	25.4999	4287.17	1304.73	5.53386	0.516074	0.109832	3294.91	32.1986
PI594053	N504	Yes	2.31992	28.7194	1.36314	21.8319	2944.2	1224.35	5.52124	0.510342	0.165794	2810.42	29.1454
PI594054	N505	Yes	2.07357	40.1467	2.08873	23.8281	4820.74	1568.98	7.80395	0.374007	0.272814	4049.6	37.5201
PI594055	N506	Yes	2.1437	20.7063	1.6524	23.6341	4278.48	1307.49	6.13494	0.3985	0.126523	3343.92	36.6001
PI594056	N507	Yes	1.65504	35.4932	1.5412	24.118	3882.64	1269.84	5.74224	0.573376	0.128995	3155.09	30.9931
PI594057	N508	Yes	1.88965	40.1645	2.08002	27.8775	4394.83	1524.94	6.21394	0.459888	0.287157	3689.47	36.2441
PI594058	N509	Yes	2.04066	28.6992	1.43834	21.2755	3983.22	1314	4.91735	0.476499	0.148396	2941.27	25.9573
PI594059	N510	Yes	2.18634	29.4321	1.43107	18.9515	3886.2	1254.48	6.50302	0.572597	0.246558	2871.07	21.2954
PI594060	N511	Yes	2.3501	33.6294	2.32869	19.9925	4219.75	1203.06	5.83683	0.47364	0.0980071	3193.72	28.2299
PI594061	N512	Yes	2.00747	33.7848	2.02022	23.3934	4226.48	1436.51	6.3338	0.417858	0.156748	3502.01	35.5711
PI594062	N513	Yes	2.07367	25.4632	2.03273	24.5389	4034.55	1426.18	6.2097	0.401389	0.095464	3566.88	30.594
PI594063	N514	Yes	2.11016	32.1819	1.91178	23.6185	4036.18	1345.7	5.91844	0.417242	0.120595	3444.95	27.5767
PI594064	N515	Yes	2.39465	35.7961	2.16998	21.109	4514.99	1299.24	6.63991	0.493487	0.116999	3431.87	31.8329
PI594065	N516	Yes	2.29394	49.5701	2.87664	28.2168	4140.86	1412.02	5.59531	0.524595	0.356563	3068.27	29.8098
PI594066	N517	Yes	2.12452	42.3446	2.20683	22.7591	3975.25	1326.19	5.60512	0.47026	0.0396613	3277.85	28.8395
PI594067	N518	Yes	2.2478	66.1204	3.8138	23.3577	4404.6	1644.4	8.56615	0.496364	0.172981	3655.28	25.5274
PI594068	N519	Yes	2.25608	34.6229	1.86301	21.6999	4133.95	1353.18	7.11044	0.479071	0.153076	3503.79	29.7936
PI594069	N520	Yes	1.69486	37.9765	2.37184	22.9246	3833.37	1494.39	5.43728	0.447952	0.434879	3449.53	28.7011
PI594070	N521	Yes	1.77332	33.0415	2.74129	22.1882	4084.39	1280.61	4.51493	0.382224	0.524158	3293.13	33.2517
PI594071	N523	Yes	1.83978	33.4592	2.63473	22.0613	4126.35	1442.2	7.90803	0.454643	0.111075	3794.65	33.5552
PI594072	N524	Yes	2.23533	24.2893	2.1255	23.4284	3706.15	1297.25	7.44754	0.53521	0.126325	2974.78	26.9429
PI594073	N525	Yes	2.46933	27.1731	2.32256	26.9231	4440.96	1371.56	8.29127	0.642232	0.189648	3283.69	32.3474
PI594074	N526	Yes	2.1703	25.9874	1.62793	24.2344	3728.4	1518.73	8.03031	0.465693	0.390154	3438.58	24.926
PI594075	N528	Yes	2.18885	38.3303	2.6627	20.7565	4101.51	1217.39	7.77747	0.445526	0.193739	3180.43	29.6549
PI594076	N529	Yes	2.51737	38.6037	2.29498	24.386	4049.07	1422.42	4.69922	0.405504	0.27985	3365.99	28.8938
PI594077	N530	Yes	2.41256	43.4297	2.02797	27.2044	3623.43	1353.21	6.04044	0.422988	0.313174	3157.89	29.4631
PI594078	N532	Yes	2.40774	47.3764	2.61389	28.5823	4246.83	1423.37	6.54861	0.497589	0.260534	3701.82	35.5993
PI594079	N533	Yes	2.05195	30.7331	3.20144	24.0176	4194.57	1154.4	4.10147	0.59966	0.142061	3174.18	31.5882
PI594080	N534	Yes	1.96033	57.2639	2.16776	24.4418	4430.77	1273.61	4.49808	0.445419	0.118555	3465.76	33.7481
PI594081	N535	Yes	2.09493	38.8383	1.77952	26.1188	4137.61	1308.63	5.77464	0.498277	0.186674	3485.39	34.537
PI594082	N536	Yes	2.31449	34.7135	2.22128	24.6283	4023.65	1331.02	5.80616	0.429631	0.0708969	3243.53	28.0331
PI594083	N537	Yes	1.97034	24.3506	1.61935	22.7617	3792.09	1442.75	5.83001	0.386683	0.119737	3396.09	27.3073
PI594084	N538	Yes	2.28346	39.7965	2.23103	23.902	3764.44	1379.64	5.31471	0.439088	0.0981505	3309.61	27.6328
PI594085	N539	Yes	2.03709	26.5784	2.03478	24.4014	3995.18	1408.4	6.23891	0.440715	0.0702344	3473.68	28.6878
PI594086	N540	Yes	1.89903	34.3286	2.31601	22.9745	3872.77	1352.76	4.98325	0.416574	0.0950526	3341.28	27.9506
PI594087	N541	No	1.90541	57.8812	3.85714	24.2729	3839.24	1369.36	6.243	0.58383	0.131428	3480.76	34.374
PI594088	N542	Yes	1.97516	59.4916	3.69524	21.1685	3778.57	1341.88	6.90996	0.381169	0.16622	3384.81	33.6669
PI594089	N543	No	1.90829	46.9295	2.50095	23.872	4485.48	1348.55	5.82082	0.450592	0.224885	3435.28	26.8891
PI594090	N544	Yes	2.07347	64.2581	2.63469	22.6575	3855.9	1346.62	5.4168	0.394949	0.0486627	3370.32	30.5795
PI594091	N545	Yes	2.29415	32.4972	1.66254	21.5305	3450.81	1212.5	5.19952	0.426214	0.0656987	2819.97	26.0357
PI595366	N209	Yes	2.4936	56.0946	1.58127	21.5336	4218.78	1349.08	6.748	0.488861	0.41525	3100.18	29.5086
PI595367	N215	Yes	2.16789	68.6398	1.83112	20.0824	3925.28	1395.75	5.75833	0.451973	0.171835	3416.01	29.4611
PI595541	CML247	Yes	2.22463	50.3615	2.16758	19.4591	4499.26	1267.75	5.60477	0.366582	0.320318	3303.45	34.7394
PI595544	CML264	Yes	2.30155	53.7083	4.09087	24.9644	4565.48	1372.25	7.15689	0.693935	0.423937	3582.69	31.2301
PI595549	CML274	Yes	2.29892	46.3348	1.87653	20.3215	5351.75	1222.64	4.11815	0.439559	0.0924316	3548.84	26.6413
PI595553	CML25	Yes	2.30686	60.0375	2.08561	20.8944	4558.04	1285.4	5.15271	0.388168	0.223945	3252.3	31.5274
PI595554	CML27	Yes	2.16125	73.3918	1.75817	25.0066	4127.38	1451.86	4.93916	0.406949	0.437956	3417.22	29.1426
PI595556	CML29	Yes	2.40759	62.9419	2.17566	24.814	4394.84	1333.24	7.30558	0.417525	0.372804	3449.12	29.2444
PI595558	CML32	Yes	1.87556	30.7816	1.63507	22.4537	4334.97	1346.9	5.08866	0.436303	0.491228	3144.92	29.4831
PI595559	CML33	Yes	2.42613	50.467	2.10715	23.8842	4335.86	1409.85	6.11213	0.425526	0.174939	3211.97	37.1702
PI595568	CML299	Yes	2.05057	37.755	2.26852	21.6127	4593.65	1486.63	5.30709	0.43247	0.36129	3763.28	32.3094
PI595569	CML300	Yes	1.98692	25.7013	1.91629	16.1162	3844.14	1206.89	4.15857	0.390012	0.336332	3132.08	25.2673
PI595616	ZS01250	Yes	2.16373	25.622	2.06639	27.6227	4842.25	1254.97	5.18327	0.596436	0.0564437	3251.19	35.8431
PI596355	N216	Yes	2.44174	40.1503	2.9158	25.201	4538.3	1354.29	7.01644	0.445965	0.349165	3406.24	37.5898
PI596356	N217	Yes	2.38808	27.3802	1.70504	19.5368	4540.99	1284.26	6.25904	0.482047	0.205643	3459.39	24.0498
PI596357	N218	Yes	2.48207	27.6848	1.78545	23.1761	4713.3	1422.2	3.98885	0.488693	0.181682	3468.39	27.8085
PI596499	OC12	Yes	2.15817	55.7504	2.24306	20.5207	4056.6	1314.49	4.4808	0.421505	0.160923	3131.75	29.4152
PI596500	OC13	Yes	2.29174	54.5628	2.47961	23.7617	4895.22	1207.28	3.81611	0.645308	0.00553491	2865.24	28.6845
PI596501	OC14	Yes	2.10666	40.7503	1.94434	20.8783	4049.07	1330.92	5.50882	0.478146	0.146728	3315.39	33.2004
PI596502	OC15	Yes	2.38131	24.9748	2.79864	30.2121	4014.28	1345.76	5.59849	0.552284	0.255089	3001.77	36.4309
PI596504	OC17	No	2.75165	42.628	1.41689	26.3339	4381.74	1383.23	8.52441	0.707875	0.221785	3235.41	39.0227
PI596505	OC18	Yes	1.99933	30.0106	1.64124	17.5013	4355.73	1103.12	5.36276	0.414615	0.0551789	2958.88	22.3126
PI596627	Mp710	Yes	2.34854	50.2422	2.227	24.8031	4571.68	1533.82	7.65273	0.555885	0.0998812	3473.8	30.6063
PI596628	Mp711	Yes	1.8665	61.1348	3.3712	25.6135	4308.06	1296.9	7.12192	0.48901	0.137042	3128	33.0287
PI596629	Mp712	Yes	1.83506	51.4283	3.33273	24.2787	4166.89	1299.5	5.52965	0.550452	0.411409	3244.36	30.6123
PI597578	N546	Yes	2.3053	40.4934	2.15928	21.773	4697.58	1195.28	5.30849	0.426081	0.0996326	2936.56	27.1841
PI597925	B107	Yes	2.20194	37.3802	1.95894	23.3824	4551.32	1287.78	5.06623	0.455629	0.217471	3272.79	24.7185
PI597926	B108	Yes	1.76	43.1624	1.40584	23.9029	4173.57	1271.42	3.31364	0.655295	0.0616533	3210.32	30.8017
PI597927	B109	Yes	2.16637	25.1535	1.40681	23.768	3972.63	1161.61	4.40061	0.413736	0.143906	2872.12	25.695
PI600729	LP1NRHT	Yes	2.30591	32.6363	1.95527	22.1041	4977.98	1495.05	7.54925	0.465985	0.188266	4024.86	26.1156
PI600751	SeagullSeventeen	Yes	2.4566	26.3943	2.85552	25.2456	4461.83	1202.66	6.18295	0.576271	0.123632	3211.06	28.2416
PI600772	FR19	Yes	2.47158	34.7052	1.34938	21.4131	4215.1	1321.83	5.28736	0.4517	0.162173	3022.32	31.15
PI600791	LH38	Yes	2.03372	48.2377	1.61392	23.913	4454.33	1520.09	7.31616	0.484283	0.50278	3036.89	29.7227
PI600944	LH39	Yes	2.07738	51.2883	2.25852	28.9386	4856.43	1528.44	9.23152	0.547994	0.397311	3136.97	37.0974
PI600954	LH119	Yes	2.04171	27.2269	1.94453	21.0765	4200.44	1291.78	4.51429	0.395552	0.207946	3188.58	29.514
PI600955	LH51	Yes	2.23721	22.2439	2.64095	23.0671	4515.17	1150.53	5.32776	0.545924	0.0370568	3061.89	26.9003
PI600956	MDF-13D	Yes	2.00469	33.1749	1.75866	19.7489	3978.83	1176.37	4.97872	0.519634	0.235752	3078.24	29.63
PI600957	LH74	Yes	2.07201	19.9202	1.26612	20.7332	4726.22	1321.78	5.6984	0.385704	0.137101	3239.36	24.1221
PI600958	FAPW	Yes	2.01793	32.9508	3.06381	22.1844	4742.66	1447.3	7.60125	0.513291	0.334732	4056.82	30.1994
PI600959	LH145	Yes	2.02035	30.4954	1.63687	18.7594	4540.35	1218.37	5.49238	0.335019	0.224662	3483.14	25.8973
PI600981	PHG39	Yes	2.37049	38.0564	2.20973	18.9224	3897.91	1378.13	6.4283	0.465504	0.210881	3338.04	26.5734
PI601004	LH132	Yes	2.20345	25.9583	1.78287	22.4303	4330.85	1310.61	5.13677	0.461831	0.215309	3260.82	31.9082
PI601005	207	Yes	3.08765	30.1108	1.4923	28.7511	4996.9	1305.21	5.92629	0.491269	0.426048	3327.22	29.8221
PI601006	PHG50	No	2.38176	29.3908	1.87041	22.9204	4473.59	1236.38	5.58719	0.477083	0.132754	3049.82	29.6275
PI601007	BO9	Yes	2.18365	28.1915	1.41072	21.0448	3528.92	1140.06	5.88021	0.576652	0.285469	2726.26	27.5677
PI601008	PHG35	Yes	2.19815	42.4617	2.0704	22.5775	4870.28	1313.28	5.06534	0.547305	0.413971	3226.9	23.5116
PI601009	B47	Yes	2.27263	50.1426	2.50792	21.4003	3793.38	1429.03	6.1416	0.470855	0.159691	3205.79	31.2016
PI601026	F42	Yes	2.19452	24.6994	1.8038	22.5637	3890.14	1109.09	3.73799	0.401013	0.165279	2695.94	26.9091
PI601037	G80	Yes	2.18326	35.9615	1.40916	22.0274	3737.71	1162.74	4.89808	0.483578	0.0974333	2788.73	25.189
PI601079	LH123HT	Yes	2.05192	28.665	1.33445	29.3388	4312.37	1348.96	6.59691	0.477959	0.35419	3203.42	30.2195
PI601080	CR1HT	Yes	2.01862	37.7357	2.7694	21.5862	4297.37	1270.58	4.81419	0.443767	0.127577	3077.69	34.6057
PI601081		No	2.65344	59.4764	2.94501	22.3837	3558.06	1230.23	5.54031	0.581579	0.135714	2668.56	29.9524
PI601150	PHG71	Yes	1.99043	42.2667	1.25443	22.7954	4216.33	1273.91	6.6059	0.324704	0.437368	3298.91	21.4432
PI601159	6103	Yes	2.15618	38.2487	1.79525	19.5103	4455.91	1414.71	6.79465	0.393836	0.20986	3455.46	32.1282
PI601170	LH82	Yes	1.88675	27.2109	1.78566	20.5044	3878.98	1198.65	6.11403	0.465438	0.0632771	3102.21	27.3603
PI601171	LH93	Yes	1.90667	39.3495	2.87503	22.9577	4259.31	1308.95	7.35381	0.531642	0.286869	3239.44	25.0589
PI601172	HBA1	Yes	1.85228	31.1221	1.79552	23.4148	4135.37	1192.96	5.85107	0.451287	0.205421	2680	24.3907
PI601190	Q381	Yes	2.60477	39.5864	1.62246	28.2018	4751.3	1408.74	5.72795	0.456601	0.634888	3433.1	30.1861
PI601191	DJ7	Yes	2.1156	27.6328	1.71103	22.6109	4250.4	1191.88	3.8865	0.433986	0.0426988	2968.74	29.8459
PI601208	IB014	Yes	2.49615	31.64	1.56788	21.159	4413.83	1241.85	5.52564	0.461964	0.193519	2986.23	26.7108
PI601209	MBNA	Yes	2.02613	40.4392	3.2754	29.2275	4865.76	1309.05	7.3835	0.535398	0.193231	3618.93	33.2228
PI601210	78004	Yes	2.17076	25.8055	1.4014	22.216	3717.03	1134.67	3.831	0.483824	0.206406	2817.62	28.1895
PI601211	78010	Yes	2.05603	22.84	1.55836	19.615	4385.98	1174.77	4.91075	0.446747	0.0898964	2964.1	24.2822
PI601229	PHG83	Yes	2.14583	31.2639	2.16074	25.5125	4341.92	1263.94	5.12185	0.630908	0.0556792	2970.33	27.0115
PI601230	LH150	Yes	2.09952	44.5307	1.69503	22.0918	4337.92	1068.62	4.84019	0.374429	0.13063	3001.88	26.0435
PI601269	5707	Yes	2.13984	68.8561	2.09022	20.455	4023.8	1103.06	4.43828	0.442744	0.483431	2682.77	22.5949
PI601270	PHG29	Yes	2.65879	25.432	1.70952	23.0295	4377.87	1190.53	4.57586	0.468613	0.294582	3152.32	24.8721
PI601272		No	2.27431	68.3073	3.20767	29.9455	5046.01	1556.18	12.4004	0.436343	0.425625	3666.05	39.7698
PI601273		No	2.44787	35.1889	2.00639	33.0968	5169.33	1554.49	6.79147	0.50566	0.25557	3794.32	40.1379
PI601274		No	2.16441	46.9394	2.84124	31.4491	4667.44	1415.59	7.3743	0.494421	0.361495	3326.49	37.6701
PI601275		No	2.24874	27.8258	2.47984	25.6858	5458.35	1333.85	7.33329	0.473534	0.355541	3467.93	35.2364
PI601276		No	2.2321	29.8049	4.09375	26.4242	5024.37	1403.82	8.5396	0.502179	0.360413	3280.12	31.9644
PI601300	4676A	Yes	2.25186	34.0968	2.17051	18.9845	4164.99	1288.08	5.55784	0.45159	0.0459583	3095.96	27.2019
PI601301	78002A	Yes	2.22813	34.5732	1.6741	23.7851	4517.03	1233.79	4.8096	0.492372	0.0949422	3172.33	29.3566
PI601316	LH54	Yes	2.30562	48.7615	2.18615	24.8864	4559.45	1271.57	5.61392	0.570032	0.276248	3250.58	29.1167
PI601317	LH57	Yes	2.63122	48.5967	2.37891	25.362	4970.84	1371.06	6.64289	0.478553	0.128352	3533.02	37.1647
PI601318	PHG47	Yes	2.38736	38.3418	1.60574	32.8956	5121.85	1543.72	10.7911	0.475167	0.612686	3954.22	40.2868
PI601319	PHG72	Yes	2.18689	33.0816	1.86289	23.6233	4898.79	1341.76	5.87712	0.341657	0.384024	3673.9	29.7343
PI601320	PHG84	Yes	1.99917	30.0574	2.1833	21.943	4783.94	1301.14	5.37662	0.432891	0.130218	3286.42	26.0358
PI601321	PHJ40	Yes	2.24658	30.9678	1.28898	21.5332	5097.62	1432.55	6.27406	0.683445	0.148908	3444.24	24.5242
PI601322	PHZ51	Yes	2.06601	27.505	1.3447	19.0514	4286.14	1117.22	4.36194	0.49569	0.0499141	2812.54	27.0824
PI601323	SX-4-21Tetraploid	Yes	2.2838	48.8113	3.39004	32.941	5506.56	1537.79	9.32078	0.508094	0.371013	3614.7	45.15
PI601324	SX-4-4Tetraploid	No	2.3277	49.8226	2.35451	37.7138	4783.07	1588.96	8.516	0.511311	0.424621	3677.17	44.002
PI601329	SX-6-10Tetraploid	No	2.35522	35.2532	2.62194	32.1673	4745.6	1427.08	7.15339	0.45852	0.444885	3582.32	39.2035
PI601331	SX-6-3Tetraploid	Yes	2.15831	36.6852	2.54222	26.0079	4504.04	1317.8	5.34584	0.543143	0.319269	3025.49	32.0008
PI601332	SX-6-7Tetraploid	Yes	2.25681	30.1801	3.92332	27.0827	4852.12	1451.74	6.7511	0.469872	0.236132	3583.65	31.1102
PI601360	LH52	Yes	2.27191	37.539	1.6573	23.3425	4473.7	1356.26	8.10872	0.631202	0.129905	3370.44	30.9624
PI601361	PHR36	Yes	1.94222	23.2714	1.45799	29.9313	4832.51	1337.6	7.9289	0.414919	0.0300705	3308.54	38.4734
PI601362	PHW17	Yes	2.15334	25.8288	1.58696	24.369	4866.55	1339.39	5.69491	0.458806	0.0973951	3338.68	31.7236
PI601374	764	Yes	2.15901	40.7759	1.79449	22.6497	4659.81	1284.16	6.3747	0.400645	0.215373	3244.29	31.0084
PI601375	778	Yes	2.11463	39.6162	2.67653	22.2796	4365.24	1409.54	6.21223	0.382591	0.566095	3316.65	35.977
PI601376	779	No	2.15428	19.1634	2.2535	27.3593	4658.55	1463.63	6.26821	0.566515	0.097531	3278.02	31.3053
PI601377	794	Yes	2.22636	25.7103	1.85955	27.1477	4128.1	1297.35	3.20436	0.372263	0.0647532	3150.97	29.5058
PI601378	LP5	Yes	2.25228	30.1403	2.12812	22.0556	4432.32	1202.59	4.06587	0.406781	0.196101	3028.16	29.7769
PI601402	LH146Ht	Yes	2.08079	29.4105	1.50237	19.0581	4218.76	1351.61	5.64992	0.381951	0.154029	3206.49	23.4979
PI601403	LH156	Yes	2.16371	33.9309	1.78336	26.7744	4266.76	1417.4	6.82549	0.44908	0.337104	3248.48	38.8087
PI601404	LH60	Yes	2.16797	26.5775	2.43947	21.6629	4405.46	1256.77	4.88002	0.54574	0.131531	3373.28	29.5697
PI601405	LH85	Yes	2.14681	32.276	2.84561	21.1485	4092.85	1337.47	5.08215	0.418993	0.157558	3276.77	30.7743
PI601416	LH61	Yes	2.56245	27.0829	2.32698	24.458	4071.49	1251.49	5.13111	0.584573	0.139881	3186.67	28.5382
PI601417	NS701	Yes	1.85785	33.2814	1.55219	21.1167	3920.79	1161.48	4.21701	0.391505	0.0869044	2923.93	27.9806
PI601430	807	Yes	2.04734	29.0628	2.57381	21.3421	4015.18	1279.76	6.57129	0.533535	0.233251	3100.32	32.0341
PI601438	78371A	Yes	2.56512	27.3285	2.42158	26.6592	5073.17	1372.39	4.72403	0.696962	0.0816238	3383.92	33.6146
PI601439	FBHJ	Yes	2.22222	29.3347	1.51165	18.9955	4517.03	1315.13	4.35629	0.466055	0.214514	3222.92	30.9325
PI601440	MBPM	Yes	2.54662	55.2595	1.57909	27.4958	4624.55	1319.99	5.51268	0.57847	0.0698945	3281.99	33.776
PI601441	PB80	Yes	1.92422	33.6091	1.96285	21.9334	4735.86	1131.05	4.50365	0.40511	0.171502	2953.57	29.0166
PI601442	PHG86	Yes	2.02204	24.2096	2.22794	20.4148	4544.84	1337.26	5.16036	0.420025	0.0820255	3039.38	29.099
PI601458	IBB15	Yes	3.03506	43.1285	1.66392	26.5874	5096.41	1230.25	6.75706	0.443881	0.444225	3309.26	28.1178
PI601459	IBC2	Yes	2.22182	32.1166	1.2013	24.8747	4299.99	1359.05	5.98746	0.510192	0.555218	3292.18	26.527
PI601466	LH59	Yes	1.92252	45.4278	2.3384	22.415	4518.24	1224.3	6.85674	0.630152	0.0472732	3148.25	29.2528
PI601467	PHK05	Yes	2.50476	29.3289	3.51436	24.5448	5005.47	1446.89	7.52871	0.607987	0.1159	3469.34	32.1751
PI601468	PHK29	Yes	2.161	42.8371	1.51072	23.6859	3934.03	1199.44	5.44568	0.485881	0.211793	2935.77	30.2354
PI601469	PHR25	Yes	2.25302	31.5387	1.89028	26.195	5162.12	1347.71	5.83721	0.441862	0.196054	3271.4	29.735
PI601470	PHV78	Yes	2.31124	24.6143	2.28572	21.8243	4750.86	1236.28	4.84465	0.490548	0.0663441	3125.25	25.2726
PI601489	740	Yes	2.40017	32.9618	2.26496	24.7569	4770.37	1268.34	4.85172	0.506441	0.0880293	3332.27	26.0867
PI601490	787	Yes	2.87494	50.7621	2.27919	20.9357	4258.65	1535.97	5.77989	0.402823	0.355142	3792.56	30.9598
PI601491	790	Yes	1.88839	43.5073	1.47623	23.3569	4433.77	1246.81	2.93813	0.414252	0.195201	2911.19	27.5726
PI601492	793	Yes	1.68147	30.3903	1.75046	20.2425	4342.44	1214.7	2.7921	0.456652	0.0207851	2788.23	28.5369
PI601493	LH149	Yes	1.8398	24.9267	1.89481	27.4393	4265.28	1226.99	3.83174	0.503718	0.120177	3038.61	24.9976
PI601494	LH65	Yes	2.229	27.5712	3.72746	27.546	4936.19	1201.03	5.73867	0.605727	0.0691288	3354.15	31.1063
PI601495	PHK42	Yes	2.34184	36.5319	1.21994	25.9902	4560.82	1376.69	5.70859	0.501736	0.630495	3395.81	27.5515
PI601496	PHK76	Yes	2.38319	34.9647	1.93865	18.6554	3531.44	1162.65	5.19969	0.502116	0.172726	2956.53	24.1164
PI601497	PHN11	Yes	2.61368	32.9889	1.34549	24.4459	4307.25	1243.42	5.92702	0.459654	0.3554	3117.38	27.9782
PI601498	PHT55	Yes	2.39618	36.7942	1.69056	20.0626	3997.52	1571.93	7.67402	0.409316	0.221885	3722.67	26.676
PI601499	PHT77	Yes	2.18438	38.382	3.32053	23.7192	4937.77	1311.5	7.72233	0.481393	0.24612	3405.67	32.0938
PI601500	PHV63	Yes	2.00101	38.6926	1.75296	24.144	4978.85	1227.26	5.38317	0.550709	0.127901	3350.49	26.0158
PI601501	PHW65	Yes	2.48435	23.9975	1.32049	24.7275	4551.4	1394.68	5.30565	0.457675	0.15725	3148	27.397
PI601502	W8304	Yes	2.04401	34.3272	1.62287	26.1229	4116.83	1161.54	3.9836	0.43117	0.143866	2986.28	28.8059
PI601558	11430	Yes	2.49087	40.9009	1.55385	23.1286	4519.49	1304.37	6.01919	0.645636	0.417931	3227.89	30.0396
PI601559	2369	Yes	1.95528	33.5604	2.09245	19.1657	4158.09	1206.29	5.14003	0.494002	0.102966	2877.42	26.3181
PI601560	2MA22	Yes	1.90846	33.1911	1.91126	21.744	3949.43	1275.05	6.58516	0.500249	0.222688	3145.2	27.7596
PI601561	6M502	Yes	2.20803	35.6213	2.2022	25.1949	4333.87	1333.85	8.64238	0.4898	0.151242	3318.88	30.8715
PI601562	78551S	Yes	2.10255	20.9504	1.33583	19.5023	4750.68	1389.97	8.2673	0.513482	0.125059	3072.04	32.6869
PI601563	87916W	Yes	2.13032	34.9872	1.78639	20.4583	4229.38	1207.89	5.27703	0.401657	0.135833	3010.26	31.8064
PI601564	HB8229	Yes	2.25315	45.1398	2.05917	21.9227	4765.63	1282.89	5.68554	0.546542	0.40002	3121.21	25.6586
PI601565	IBB14	Yes	2.59566	25.4463	1.15448	25.8956	4168.38	1215.92	5.8233	0.477921	0.456479	3264.13	32.4992
PI601566	MBST	Yes	2.11304	42.0022	2.12836	26.6644	4246.4	1377.03	6.94805	0.474865	0.287108	3353.34	37.8345
PI601567	PHH93	Yes	2.47212	33.5985	1.78787	22.9207	4650.87	1216.41	7.01202	0.422095	0.303199	3055.69	26.8487
PI601568	PHM49	Yes	2.4043	26.6755	1.53339	20.1991	4299.89	1212.53	4.79525	0.393154	0.157966	2937.43	26.5875
PI601569	PHN47	Yes	2.15349	26.5199	1.80461	21.6068	4604.19	1243.21	4.39516	0.402044	0.134693	3022.96	25.175
PI601570	PHP02	Yes	2.47625	29.1437	1.42751	20.4903	4333.82	1132.9	4.79864	0.474231	0.35451	3050.8	25.0574
PI601571	PHR32	Yes	2.16204	41.9324	2.09014	24.4365	4296.14	1403.07	8.83496	0.441221	0.262862	3470.04	29.2299
PI601572	PHR47	Yes	2.12313	37.0791	1.75617	25.5272	4617.68	1517.12	8.75614	0.561505	0.461102	3744.5	30.7679
PI601573	PHT10	Yes	1.93449	38.2102	2.42875	20.9815	4051.19	1376.67	6.01562	0.448505	0.191445	3625.15	30.1984
PI601574	PHT60	Yes	2.14408	30.3358	1.44759	21.6262	4371.32	1249.5	4.68035	0.485347	0.235644	2934.98	26.4883
PI601575	PHW52	Yes	2.83687	28.9043	2.06929	20.0741	4334.6	1396.35	6.17902	0.508561	0.31961	3444.39	27.4603
PI601576	PHW79	Yes	2.14845	30.4637	1.46511	20.7385	4276.67	1233.16	4.35623	0.41233	0.0613128	2966.68	21.0822
PI601583	NS501	Yes	2.25833	24.2721	1.31216	21.0995	4596.48	1302.11	5.42591	0.369587	0.237867	3378.26	27.2238
PI601584	OQ603	No	2.64403	39.8959	1.59613	28.2628	4444.84	1329.55	5.11517	0.456264	0.481896	3423.68	26.8235
PI601610	H8431	Yes	1.91734	40.7296	2.0624	16.6129	4217.19	1077.52	3.88658	0.42795	0.380701	2958.95	24.6209
PI601611	S8324	Yes	1.88958	28.9112	1.71251	20.543	4337.32	1264.2	4.40837	0.338924	0.209025	3216.44	29.6185
PI601612	S8326	Yes	1.94954	34.254	2.71819	23.7437	4281.35	1218.32	5.42494	0.479362	0.0538596	3172.6	27.2773
PI601658	1538	Yes	2.29928	35.6501	2.01524	24.4109	4898.35	1421.84	6.99166	0.436618	0.261447	3955.19	30.1152
PI601683	CR14	Yes	2.48727	38.9479	1.68759	18.7003	4126.64	1167.08	5.44195	0.48598	0.11639	2922.83	29.3287
PI601684	WIL900	Yes	2.57008	30.9095	2.08111	22.1091	4482.4	1217.18	5.92673	0.521275	0.0647039	3083.84	29.1163
PI601685	WIL901	Yes	2.71773	29.1483	2.44409	24.0069	4701.11	1332.47	6.29349	0.58352	0.132389	3410.51	33.5675
PI601686	WIL903	Yes	2.1104	39.1075	1.69451	22.9313	3838.14	1277.11	5.77374	0.531487	0.1032	3015.87	23.902
PI601689	WIL500	Yes	2.62423	23.9066	2.69985	28.5311	5797.36	1421.67	7.72453	0.533979	0.104644	3918.2	31.8444
PI601724	E8501	Yes	2.28854	43.4202	2.02842	22.2788	4020.78	1257.53	4.18265	0.584296	0.349496	2967.9	35.4475
PI601725	J8606	Yes	2.78619	42.2406	1.82095	27.0955	4223.35	1379.4	6.22241	0.534663	0.307609	3065.67	32.1811
PI601726	L127	Yes	2.41762	47.289	1.3136	27.8911	4828.14	1390.43	6.52095	0.474305	0.30539	3502.16	27.4658
PI601727	L135	Yes	2.51773	36.3046	1.23268	29.6394	4703.74	1463.86	6.52497	0.385157	0.297065	3534.27	29.7332
PI601728	L139	Yes	1.91092	45.9575	1.268	20.6855	3774.05	1356.64	8.07399	0.44855	0.394613	2725.24	23.818
PI601729	W8555	Yes	2.16518	35.0412	1.14617	24.5259	4577.86	1282.1	5.67769	0.526182	0.214679	2922.92	26.6634
PI601745	4N506	Yes	2.52856	32.3395	2.14874	22.4976	4341.12	1255.33	3.94665	0.393628	0.0937219	2885.68	27.5901
PI601773	PHJ31	Yes	1.94518	27.6164	1.78469	25.8283	4835.47	1507.85	5.16303	0.442923	0.206242	3545.57	29.4669
PI601774	PHJ33	Yes	2.3614	34.4194	2.64748	22.7565	4873.08	1389.22	6.37314	0.606234	0.0701809	3475.39	27.5932
PI601775	PHJ70	Yes	1.92812	34.7141	1.43564	19.6126	3545.67	1318.56	6.51297	0.477028	0.277675	3167.11	22.3383
PI601776	PHJ75	Yes	2.77819	33.4567	2.28399	26.7639	4456.8	1373.6	6.94121	0.567043	0.4031	3106.92	29.4863
PI601777	PHK35	Yes	2.27273	35.0235	2.59241	23.3702	4437.67	1388.04	5.45083	0.382745	0.401011	3346.77	28.7975
PI601778	PHM10	Yes	2.202	17.5312	1.51529	20.1096	4527.67	1279.48	5.7845	0.465456	0.344198	3230.96	21.688
PI601779	PHM57	Yes	2.02401	27.1861	2.51575	21.2969	4231.66	1362.49	5.98791	0.587437	0.206688	3158.24	28.1902
PI601780	PHN29	Yes	2.05392	29.0656	1.70317	20.4409	3880.57	1260.69	3.82427	0.34746	0.255449	2769.99	19.9192
PI601781	PHN37	Yes	1.92638	31.3227	1.41452	21.2127	5309.77	1280.32	5.33137	0.453741	0.216869	3692.97	21.7562
PI601782	PHN73	Yes	2.2351	43.8781	1.59524	29.9775	4802.64	1396.31	7.53091	0.473817	0.214827	3155.79	37.4061
PI601783	PHN82	Yes	2.55312	35.6836	1.78969	22.8575	4365.75	1259.52	5.53195	0.473735	0.0696753	3177.17	27.3692
PI601784	PHP55	Yes	2.54854	24.0707	1.26153	20.8221	4539.34	1217.16	6.468	0.485872	0.145071	3047.8	27.2022
PI601785	PHP60	No	2.79793	59.6681	2.64649	21.0862	3990.03	1406.31	8.75598	0.394935	0.224139	3023.86	39.5175
PI601786	PHR62	Yes	2.1244	33.5302	3.18453	25.8551	4890	1436.41	7.29179	0.476579	0.298027	3799.57	27.3214
PI601788	PHT22	Yes	2.31383	22.2122	1.78162	22.9714	4546.93	1353.6	5.12714	0.443409	0.150066	3233.56	23.4502
PI601789	PHV37	Yes	2.54324	19.4611	2.3723	19.5175	4804.99	1291.19	4.43124	0.536034	0.0297188	3345.18	25.3458
PI601790	PHW03	Yes	2.36529	68.6591	2.06746	20.8605	3923.32	1460.91	7	0.301732	0.211153	3123.49	28.5148
PI601791	PHW20	Yes	2.33883	30.5901	2.39854	24.0514	4603.7	1347.66	5.41629	0.463481	0.118029	3364.5	34.7561
PI601792	PHW43	Yes	2.10804	38.7428	1.86807	21.1377	4534.91	1235.58	5.95438	0.564888	0.143771	2987.68	26.1723
PI601808	2FACC	Yes	2.24916	38.7354	1.83295	19.7617	4399.86	1215.98	5.98178	0.396525	0.0704312	3012.3	28.3575
PI603939	B42	Yes	1.96586	65.8232	2.00982	25.5878	3513.83	1419.15	7.01055	0.387472	0.0414599	2840.72	27.7527
PI604605	N522	Yes	2.10945	35.1206	1.86139	22.0834	4119.96	1408.88	5.9473	0.385214	0.767423	3207.47	29.9482
PI604606	N527	Yes	2.10269	38.3067	1.76002	24.0604	4024.77	1438.25	5.94234	0.412632	0.748762	3247.75	30.7572
PI606329	DE1	Yes	2.50229	27.3338	1.34873	24.1708	5231.25	1223.18	4.4036	0.494742	0.206686	2855.08	29.1974
PI606330	DE2	Yes	2.02004	37.9898	1.74944	18.9642	4497.77	1047.13	4.01362	0.430044	0.0877981	2716.83	24.0411
PI606768	SD40	Yes	2.5267	32.7475	1.338	26.1046	4365.23	1292.31	5.44914	0.482884	0.324437	3257.77	28.8875
PI606769	SD41	Yes	2.42419	31.5026	1.86039	29.1754	3825.37	1388.19	8.33961	0.367285	0.285472	3302.74	26.4219
PI607512	N7A	Yes	2.04202	25.1286	2.2764	20.0191	4496.56	1240.09	2.81392	0.515865	0.514768	2978.19	26.7294
PI607519	ND240	Yes	2.17465	37.7653	2.28965	21.3156	4742.39	1320.17	5.586	0.466029	0.224513	3293.27	30.6152
PI607521	A661	Yes	2.01674	23.7678	2.62342	20.8041	4781.37	1444.98	5.12101	0.501263	0.292877	3439.98	30.1893
PI607522	A662	Yes	2.13563	59.0147	2.1075	28.7105	3893.92	1495.36	6.24692	0.520507	0.16302	3488.04	31.6714
PI607523	A663	Yes	2.07054	38.2911	3.47969	27.3185	4857.14	1426.11	4.99909	0.545626	0.638609	3628.95	23.0173
PI607524	A664	Yes	2.02928	22.8909	2.57072	22.9195	4227.76	1455.92	7.02817	0.44034	0.373583	3533.89	22.7323
PI607525	A665	Yes	2.00128	22.4397	2.27687	19.4777	4455.44	1337.08	5.5611	0.387215	0.0607252	3418.4	31.6075
PI607527	ND300	Yes	2.05985	38.9558	1.41689	23.838	4209.13	1257.02	5.1385	0.393458	0.35667	3271.87	22.5707
PI608764	B55	Yes	2.46998	28.6214	1.46642	24.2781	4032.93	1504.16	5.86237	0.510383	0.15089	3548.41	37.4704
PI608765	B77	Yes	2.3643	37.9296	2.41294	19.9889	4925.48	1083.55	4.22714	0.676032	0.199974	3016.84	26.4993
PI608766	B79	Yes	2.38449	45.4768	2.05129	22.7386	4562.15	1257.51	5.17102	0.569068	0.125773	3119.96	29.2379
[truncated: 168 more rows]
