# Supplementary material
Source: publisher figshare collection journal article supplement (https://gsajournals.figshare.com/articles/dataset/_/13644098)
Supplement: Supplementary file 4 [file 1]

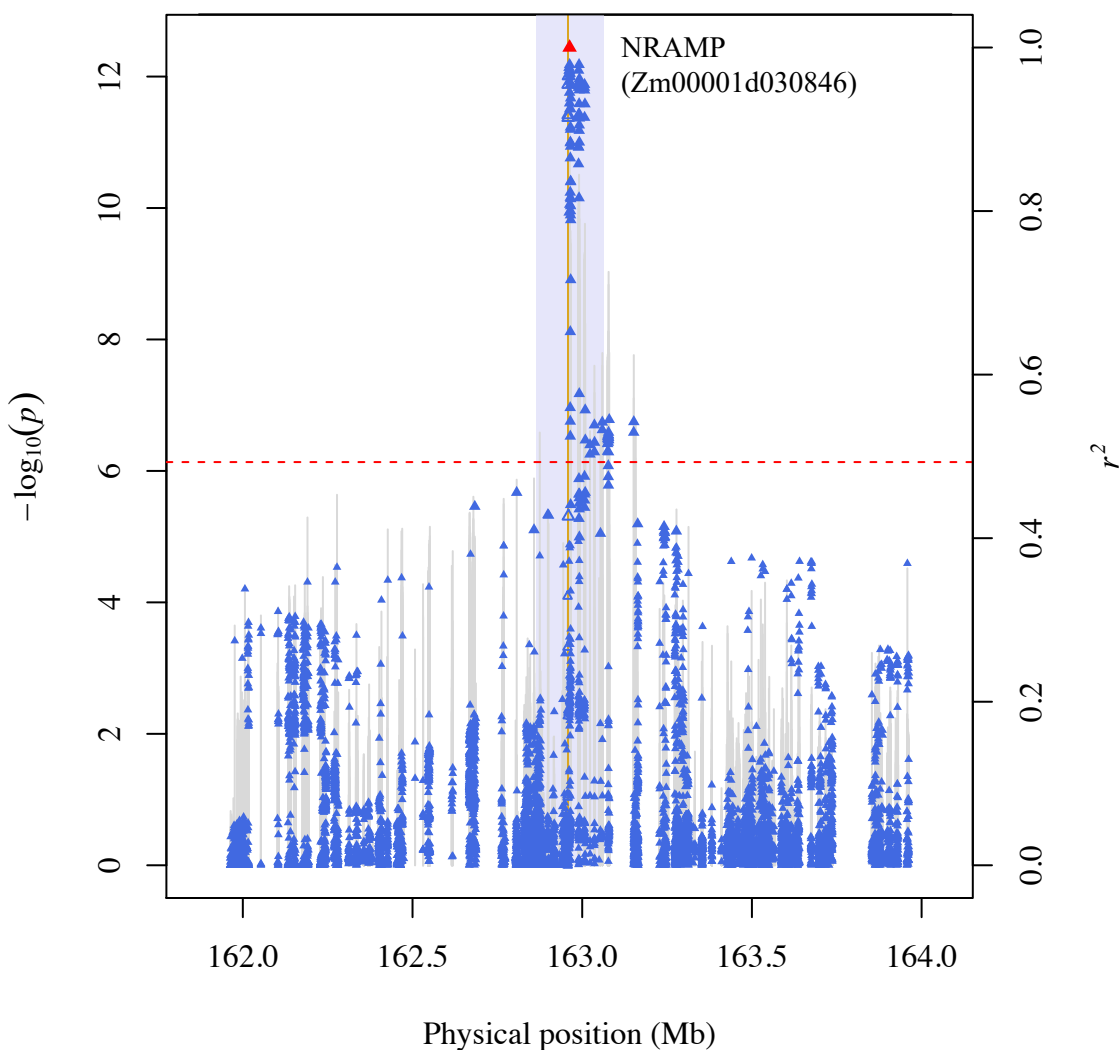

**Figure S5.** A regional Manhattan plot of locus 10. Scatter plot of association results from a mixed model analysis of Mn grain concentration and linkage disequilibrium (LD) estimates ( $r^2$ ) for a genomic region that contains the peak SNP (1-162962818) at locus 10. Each vertical line represents the  $-\log_{10} P$ -value of a SNP. Triangles are the  $r^2$  values of each SNP relative to the peak SNP (indicated in red) at 162,962,818 bp (B73 RefGen\_v4) on chromosome 1. The red horizontal dashed line indicates the  $-\log_{10} P$ -value of the least statistically significant SNP at a genome-wide false discovery rate of 5%. The yellow vertical line indicates the genomic position of the gene Zm00001d030846 that encodes a protein sharing amino acid sequence similarity with NATURAL RESISTANCE-ASSOCIATED MACROPHAGE PROTEINS (NRAMPs) in rice and Arabidopsis (Table S5). The open triangles indicate SNPs that are within the candidate gene. The light blue rectangle demarcates the  $\pm 100$  kb candidate gene search space surrounding the peak SNP.
