# Supplementary material
Source: publisher figshare collection journal article supplement (https://gsajournals.figshare.com/articles/dataset/_/13644098)
Supplement: Supplementary file 9 [file 1]

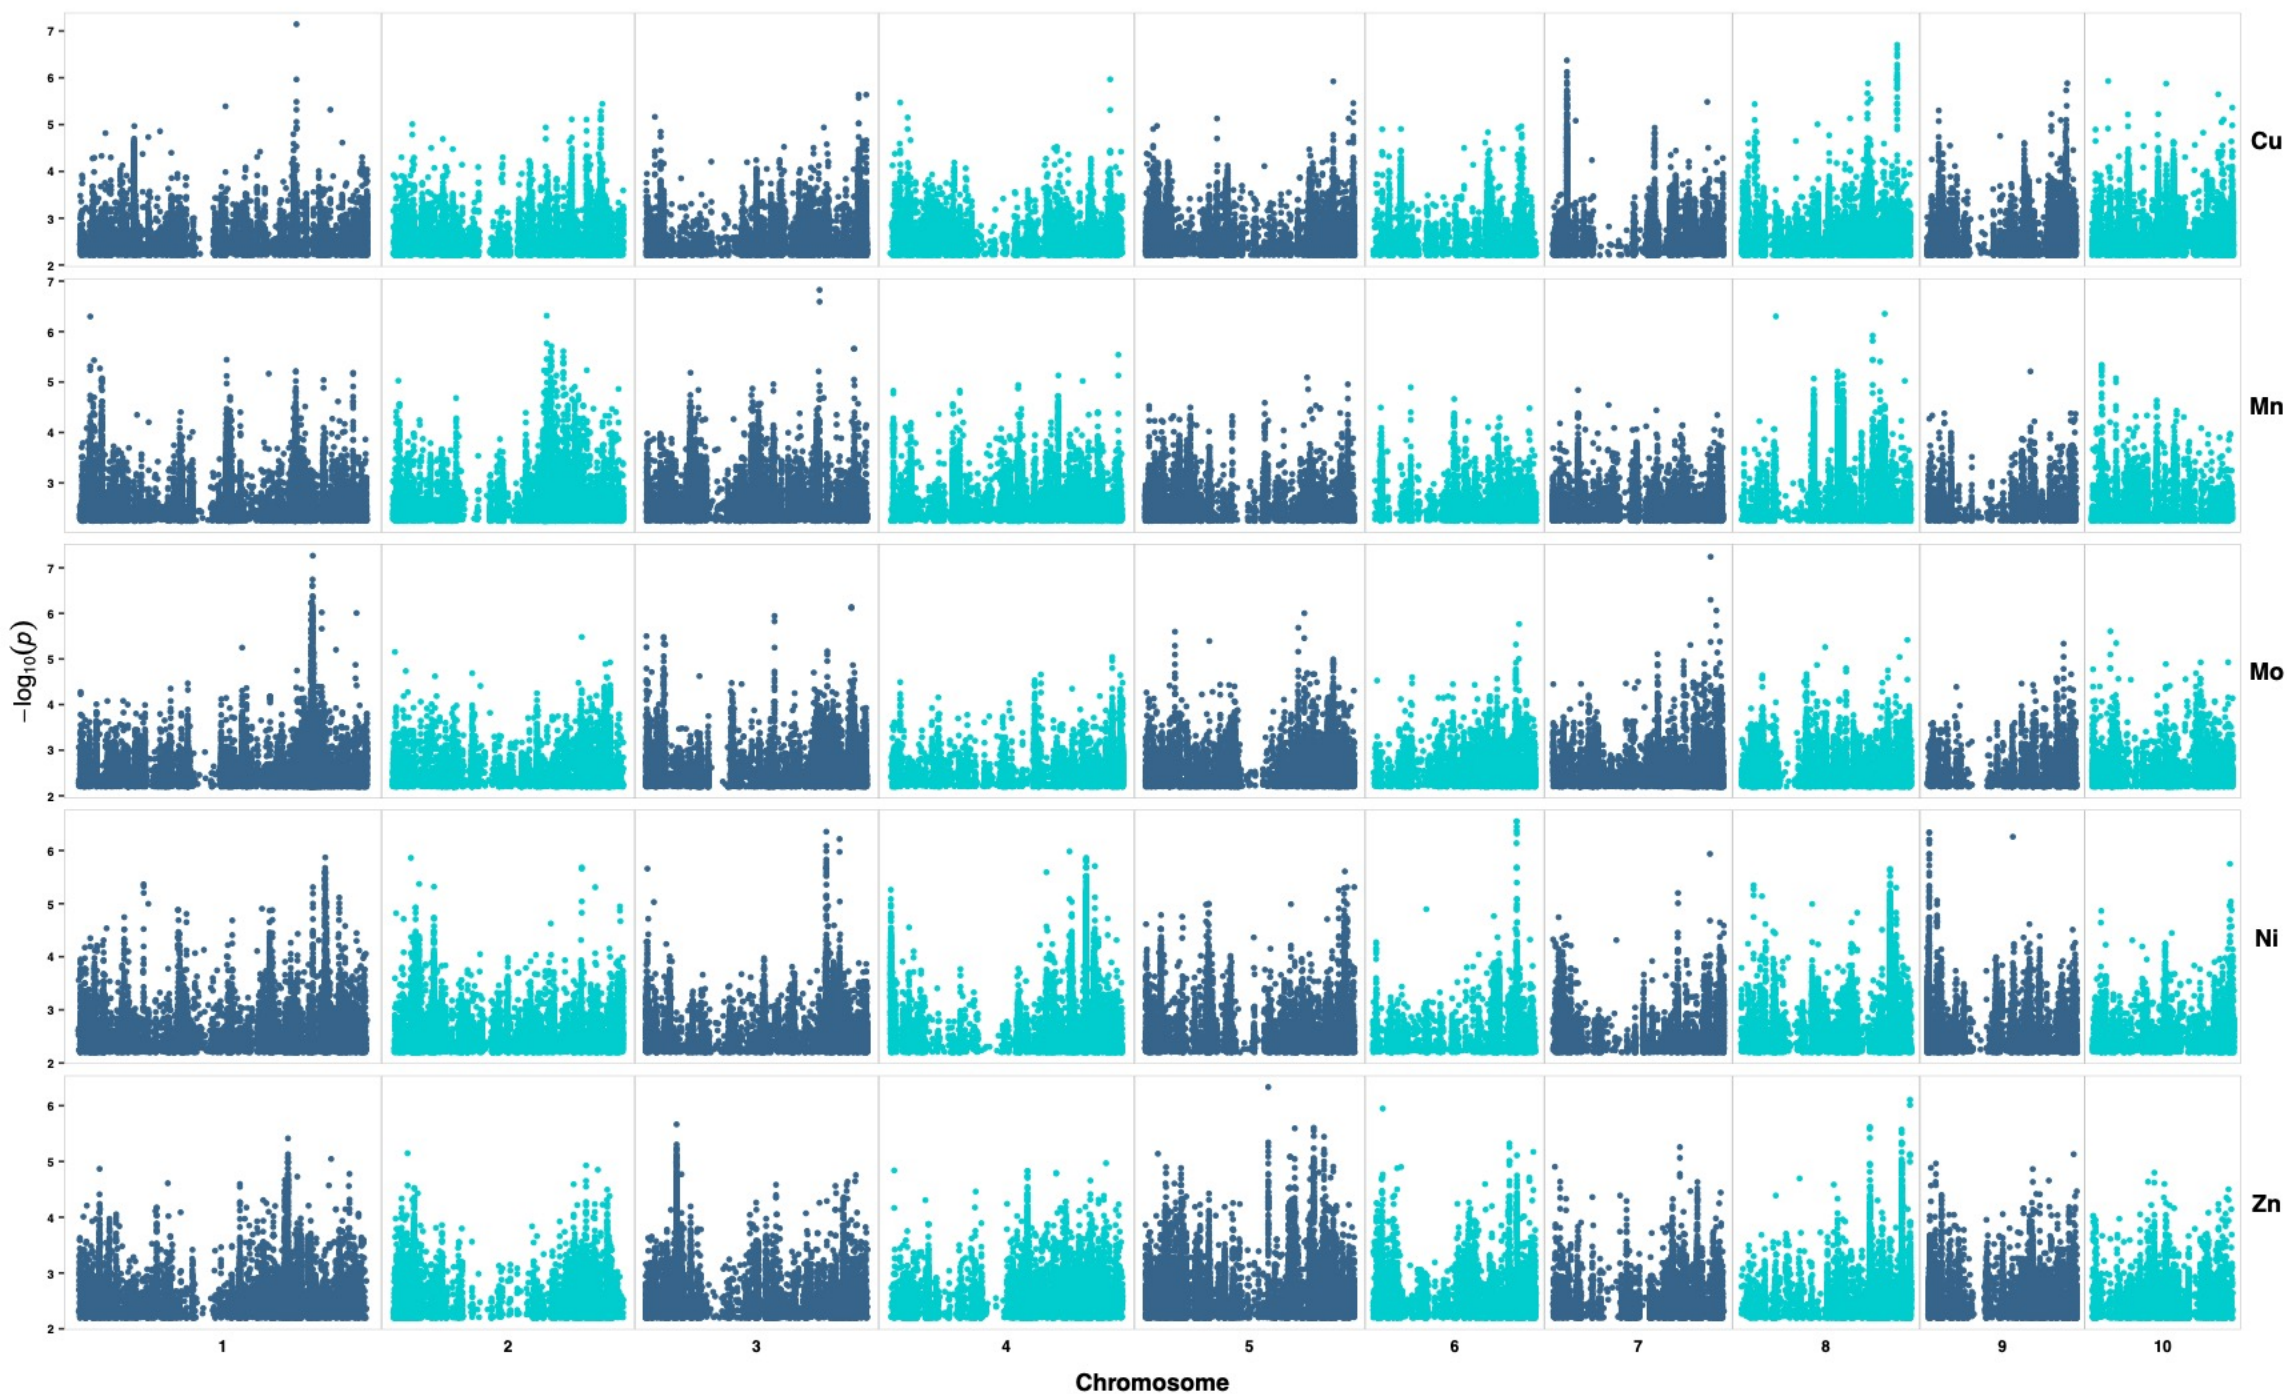

**Figure S10.** Manhattan plot of results from a conditional genome-wide association study (GWAS) of five elemental grain phenotypes in the Ames panel. For each phenotype, the SNPs selected by the optimal multi-locus mixed model were included as covariates in the mixed linear model to control for large-effect loci. Each point represents a SNP with its  $-\log_{10} P$ -value (y-axis) from a mixed linear model analysis plotted as a function of physical position (B73 RefGen\_v4) across the 10 chromosomes of maize (x-axis). None of the tested SNPs in the conditional GWAS were significant at a genome-wide false-discovery rate of 5%.
